# Supplementary material
Source: PubMed Central journal article supplement (PMC3605743)

***BOROX Catalysis: Self-assembled AMINO-BOROX and IMINO-BOROX***  
**Chiral Brønsted Acids in a Five Component Catalyst Assembly/Catalytic**  
**Asymmetric Aziridination**

Anil K. Gupta, Munmun Mukherjee, Gang Hu and William D. Wulff\*

Department of Chemistry, Michigan State University, East Lansing, MI 48824

**Supporting Information**

**Table of Contents**

|                                                                                                                                           |     |
|-------------------------------------------------------------------------------------------------------------------------------------------|-----|
| A. General Information.....                                                                                                               | S2  |
| B. NMR analysis of a mixture of VAPOL, and B(OPh) <sub>3</sub> and different bases: .....                                                 | S3  |
| C. NMR analysis of a mixture of PhCHO <b>7a</b> and EDA <b>2</b> in different reaction conditions.....                                    | S6  |
| (a) with B(OPh) <sub>3</sub> .....                                                                                                        | S6  |
| (b) with ( <i>S</i> )-VAPOL .....                                                                                                         | S7  |
| (c) with 4Å Molecular Sieves .....                                                                                                        | S7  |
| (b) without any catalyst.....                                                                                                             | S8  |
| D. Different protocols for MCAZ: Procedures (I, IIA-B, IIIA-C).....                                                                       | S8  |
| E. Different order of addition of reagents in MCAZ: Procedures (IV-VII).....                                                              | S16 |
| F. Mechanistic study of multi-component aziridination reaction. ....                                                                      | S23 |
| (a) MCAZ with 0.9 equivalents of benzaldehyde <b>7a</b> and amine <b>6'</b> .....                                                         | S23 |
| (b) Aziridination with preformed imine <b>1a'</b> with added bases illustrated by utilizing amine <b>6'</b><br>as the base. ....          | S24 |
| G. DFT calculations of IMINO-BOROX <b>9a</b> and AMINO-BOROX <b>9d</b> . ....                                                             | S25 |
| H. References .....                                                                                                                       | S54 |
| I. A copy of <sup>1</sup> H NMR and <sup>13</sup> C NMR of <b>1a</b> , <b>1a'</b> , <b>5a</b> , <b>5a'</b> , <b>6</b> and <b>12</b> ..... | S56 |

## A. General Information

All reactions were carried out in flame-dried glassware under an atmosphere of nitrogen unless otherwise indicated. Toluene was distilled from sodium under nitrogen.  $\text{CHCl}_3$  was treated with potassium hydroxide and then distilled from calcium hydride under nitrogen. Hexanes and ethyl acetate were ACS grade and used as purchased.

IR spectra were recorded in KBr matrix (for solids) and on NaCl disc (for liquids).  $^1\text{H}$  NMR and  $^{13}\text{C}$  NMR were recorded using  $\text{CDCl}_3$  as solvent (unless otherwise noted) with the residual solvent peak as the internal standard ( $^1\text{H}$  NMR : 7.24 ppm,  $^{13}\text{C}$  NMR : 77 ppm). Chemical shifts were reported in parts per million. Low-resolution Mass Spectrometry and High Resolution Mass Spectrometry were performed. Analytical thin-layer chromatography (TLC) was performed on Silicycle silica gel plates with F-254 indicator. Visualization was by short wave (254 nm) and long wave (365 nm) ultraviolet light, or by staining with phosphomolybdic acid in ethanol or with potassium permanganate. Column chromatography was performed with silica gel 60 (230 – 450 mesh). Chiral HPLC data for the aziridines were obtained using a CHIRALCEL OD-H column.

Optical rotations were obtained at a wavelength of 589 nm (sodium D line) using a 1.0 decimeter cell with a total volume of 1.0 mL. Specific rotations are reported in degrees per decimeter at 20 °C and the concentrations are given in gram per 100 mL in ethyl acetate unless otherwise noted.

All reagents were purified by simple distillation or crystallization with simple solvents unless otherwise indicated. Ethyl diazoacetate **2** and triphenylborate **8** obtained from Aldrich Chemical Co., Inc. and used as received. VAPOL and VANOL were made according to published procedure.<sup>1</sup> Imine **1a** and bis-(3,5-di-methyl-4-methoxyphenyl)methanamine **6** (MEDAM amine) was made according to the published procedure.<sup>2</sup> Imine **1a'** was made according to the published procedure.<sup>4</sup>

## B. NMR analysis of a mixture of VAPOL, and B(OPh)<sub>3</sub> and different bases:

As shown in Table 1 of the manuscript, a mixture of (*S*)-VAPOL and B(OPh)<sub>3</sub> gives different yields of unreacted VAPOL **3**, mesoborate B1 **10** and pyroborate B2 **11** employing different bases. Also, it was evident from the <sup>1</sup>H NMR and <sup>11</sup>B NMR that no boroxinate B3 **9** was formed unless a base was added (characteristic peaks i.e δ 10.2-10.4 and δ 5.5-5.7 were missing in <sup>1</sup>H NMR and <sup>11</sup>B NMR respectively). The amount of B3 **9** differs with respect to different bases depending upon the strength of the bases. The analysis was carried out by mixing (*S*)-VAPOL (0.1 mmol) with B(OPh)<sub>3</sub> (0.3 mmol, 3 equiv) and base (0.2 mmol, 50 mol % catalyst loading) at room temperature in CDCl<sub>3</sub>. The yields of boroxinate B3 **9** were determined by integration against an internal standard (Ph<sub>3</sub>CH). In most of the cases, an additional peak at δ 1.2-2.4 in <sup>11</sup>B NMR was also observed (for example; see Figure 3). This peak is tentatively assigned to be of the tetraphenoxy borate salt of the base involved (unpublished results by Gupta, A. K. and Wulff, W. D.).

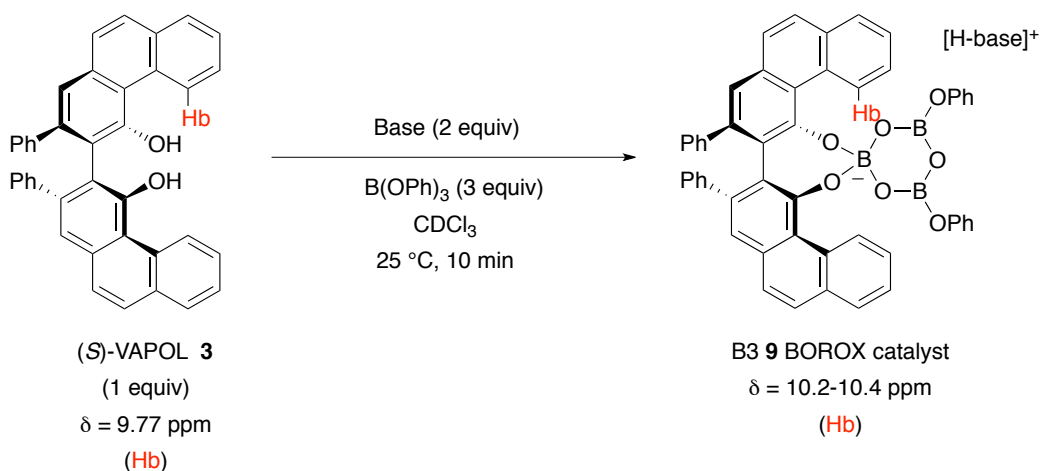

**Procedure:** To a 10 mL flame-dried single-necked round bottom flask, equipped with a stir bar and a rubber septum and filled with argon was added (*S*)-VAPOL **3** (54 mg, 0.10 mmol, 1.0 equiv), B(OPh)<sub>3</sub> (87 mg, 0.30 mmol, 3.0 equiv), base (0.20 mmol, 2.0 equiv), Ph<sub>3</sub>CH (12.2 mg, 0.500 mmol) and CDCl<sub>3</sub> (1 mL). The resultant mixture was stirred for 10 min at room temperature. The resulting solution was then directly transferred to a quartz NMR tube (freshly flame-dried) and was subjected to NMR analysis.

$^1\text{H}$  and  $^{11}\text{B}$  NMR spectra for AMINO-BOROX catalyst **9d** is shown as an example:

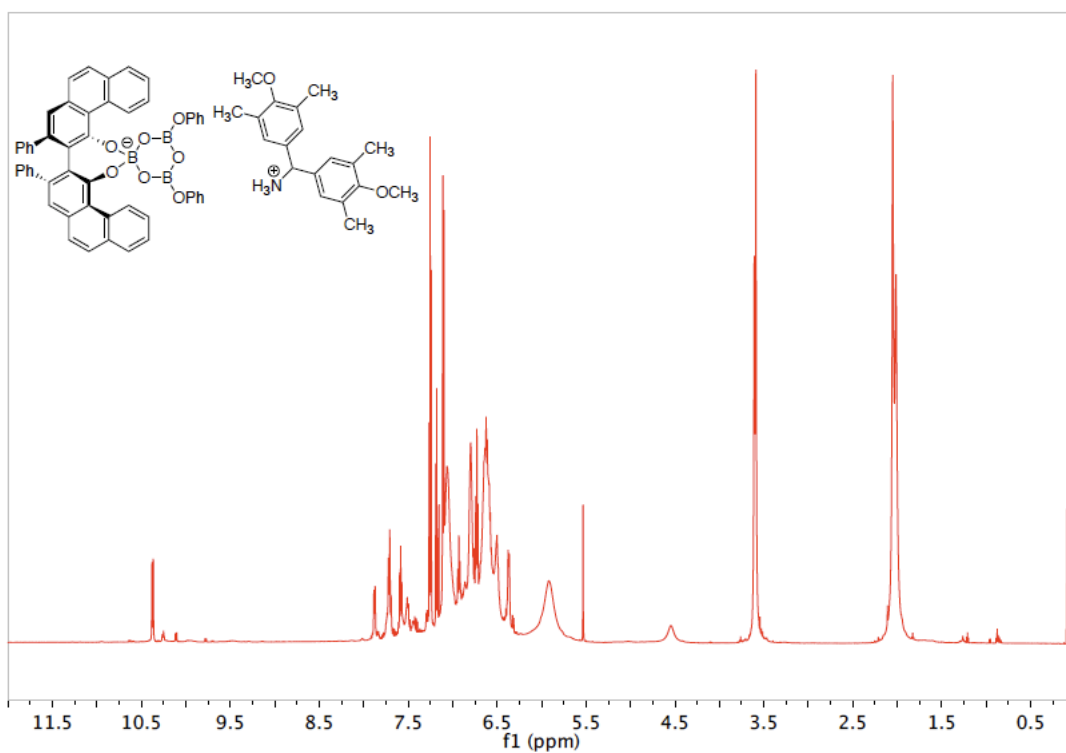

**Figure 1:**  $^1\text{H}$  NMR of AMINO-BOROX catalyst **9d**.

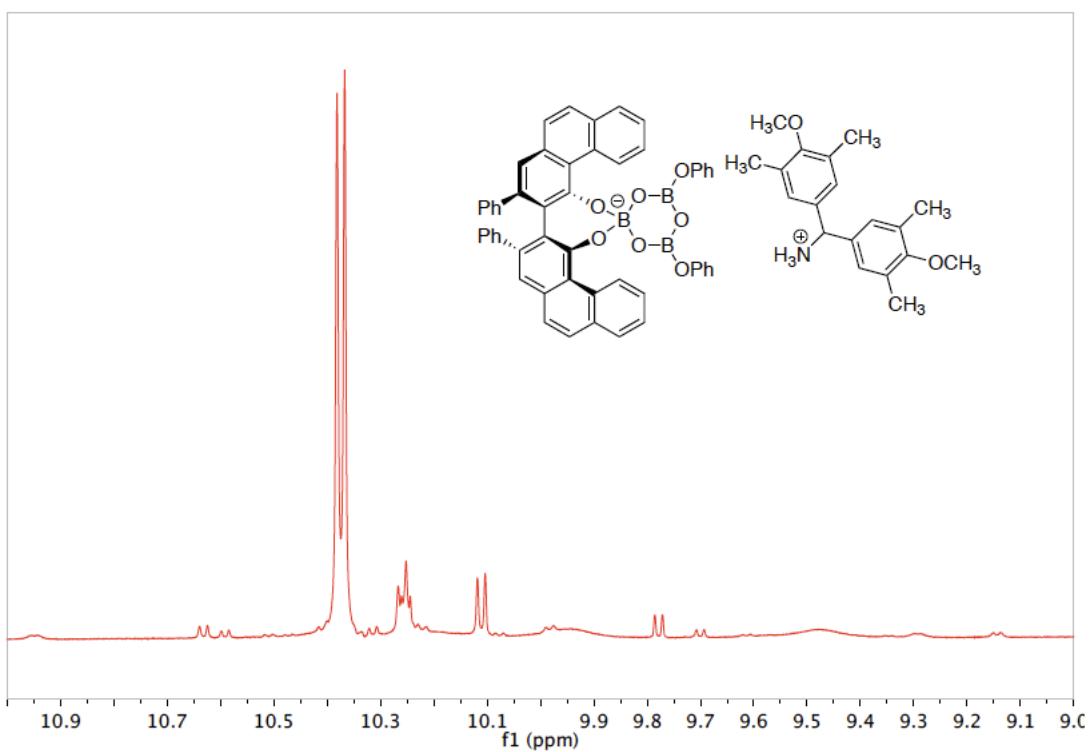

**Figure 2:**  $^1\text{H}$  NMR of the bay region of AMINO-BOROX catalyst **9d**.

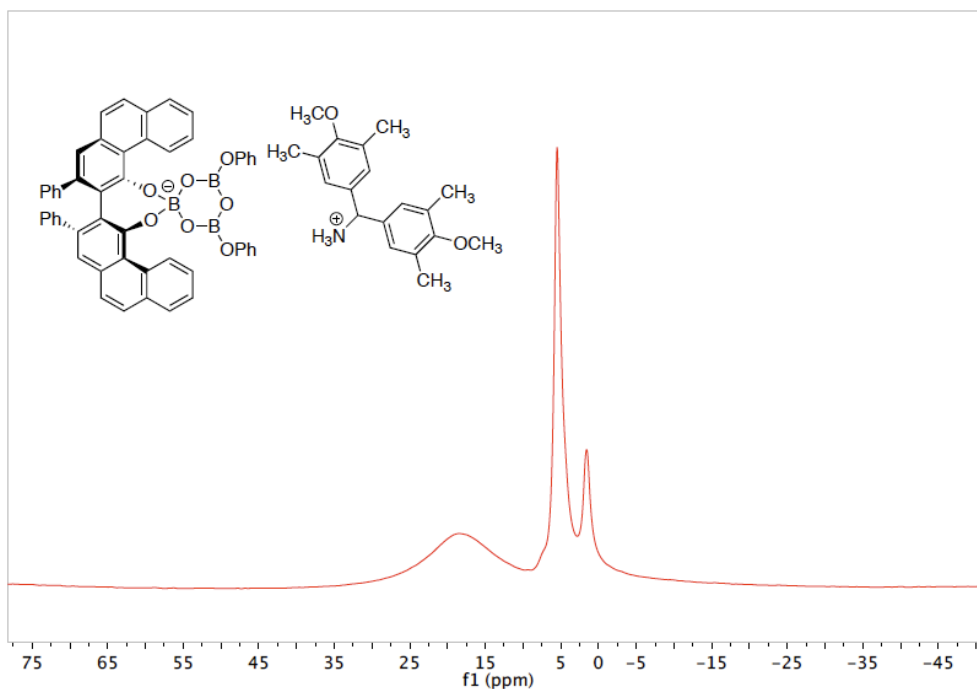

**Figure 3:**  $^{11}\text{B}$  NMR of AMINO-BOROX catalyst **9d**.

**Entry 6 of Table 1 in the manuscript:**

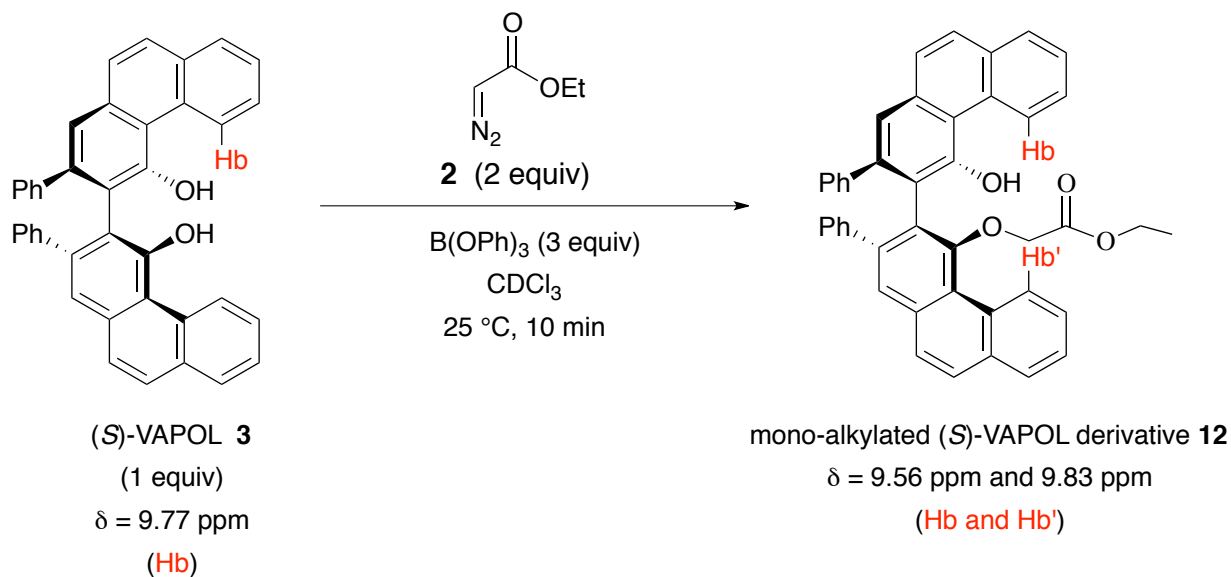

**Procedure:** To a 10 mL flame-dried round bottom flask, equipped with a stir bar and a rubber septum and filled with argon was added (S)-VAPOL **3** (54 mg, 0.10 mmol, 1.0 equiv),  $\text{B(OPh)}_3$

(87 mg, 0.30 mmol, 3.0 equiv), ethyl diazoacetate **2** (0.20 mmol, 2.0 equiv.), Ph<sub>3</sub>CH (12.2 mg, 0.500 mmol) and CDCl<sub>3</sub> (1 mL). The resultant mixture was stirred for 10 min at room temperature. The resulting solution was then directly transferred to a quartz NMR tube (freshly flame-dried) and was subjected to NMR analysis. The reaction furnished the mono-alkylated adduct **12** in 80 % yield as determined by integration against an internal standard (Ph<sub>3</sub>CH) and with the aid of the spectral data previously published for this compound.<sup>3,4</sup>

### C. NMR analysis of a mixture of PhCHO **7a** and EDA **2** in different reaction conditions:

As discussed in the manuscript, benzaldehyde and ethyl diazoacetate react with each other in presence of Lewis acids and Brønsted acids resulting in the formation of several products. It was thought to examine the possibility of these products under the reaction conditions of a possible multicomponent aziridination (MCAZ).

#### (a) with B(OPh)<sub>3</sub>:

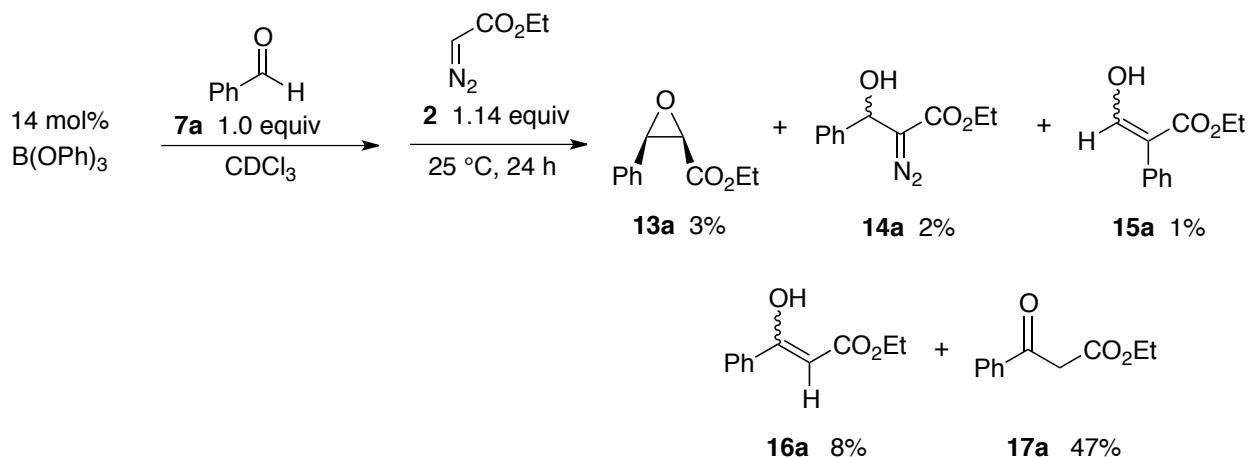

**Procedure:** To a 10 mL flame-dried single-necked round bottom flask, equipped with a stir bar and a rubber septum and filled with argon was added B(OPh)<sub>3</sub> (22 mg, 0.075 mmol, 0.14 equiv), benzaldehyde **7a** (52.0 μL, 0.525 mmol, 1.00 equiv), ethyl diazoacetate **2** (62.0 μL, 0.600 mmol, 1.14 equiv), Ph<sub>3</sub>CH (12.2 mg, 0.500 mmol) and CDCl<sub>3</sub> (1 mL). The resultant mixture was stirred for 24 h at room temperature. The resulting solution was then directly transferred to a NMR tube and was then subjected to NMR analysis. Several products were observed as shown in the reaction. The presence of each product was confirmed by characteristic peaks (δ 3.83 **13a**<sup>5</sup>, δ 5.91 **14a**<sup>6</sup>, δ 12.20 **15a**<sup>7</sup>, δ 12.61 **16a**<sup>8</sup>, δ 3.98 **17a**<sup>7</sup>) in the <sup>1</sup>H NMR previously published for these

compounds and the amount of each was quantified by integration against an internal standard ( $\text{Ph}_3\text{CH}$ ). There was also 5 % of unreacted benzaldehyde **7a**.

**(b) with (S)-VAPOL:**

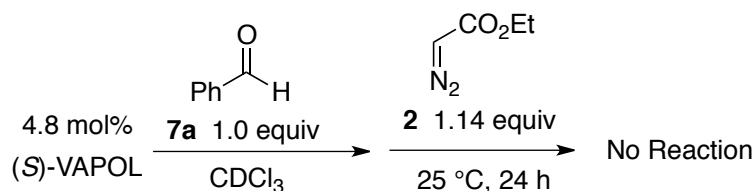

**Procedure:** To a 10 mL flame-dried single-necked round bottom flask, equipped with a stir bar and a rubber septum and filled with argon was added (S)-VAPOL **3** (14 mg, 0.025 mmol, 0.048 equiv), benzaldehyde **7a** (52.0  $\mu\text{L}$ , 0.525 mmol, 1.00 equiv), ethyl diazoacetate **2** (62.0  $\mu\text{L}$ , 0.600 mmol, 1.14 equiv),  $\text{Ph}_3\text{CH}$  (12.2 mg, 0.500 mmol) and  $\text{CDCl}_3$  (1 mL). The resultant mixture was stirred for 24 h at room temperature. The resulting solution was then directly transferred to a NMR tube and was then subjected to NMR analysis. The crude NMR revealed the presence of unreacted starting materials.

**(c) with 4 Å Molecular Sieves :**

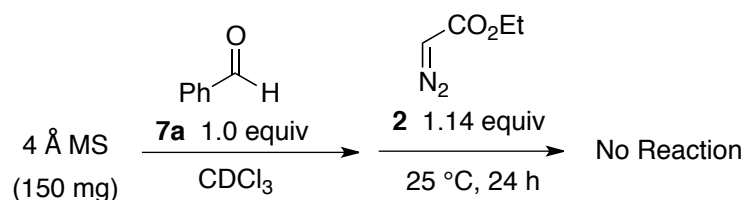

**Procedure:** To a 10 mL flame-dried single-necked round bottom flask, equipped with a stir bar and a rubber septum and filled with argon was added 4 Å Molecular Sieves (150 mg, freshly flame-dried), benzaldehyde **7a** (52.0  $\mu\text{L}$ , 0.525 mmol, 1.00 equiv.), ethyl diazoacetate **2** (62.0  $\mu\text{L}$ , 0.600 mmol, 1.14 equiv),  $\text{Ph}_3\text{CH}$  (12.2 mg, 0.500 mmol) and  $\text{CDCl}_3$  (1 mL). The resultant mixture was stirred for 24 h at room temperature. The resulting solution was then directly transferred to a NMR tube utilizing a filter syringe (Corning® syringe filters, Aldrich) to remove the 4 Å Molecular Sieves. It was then subjected to NMR analysis. The crude NMR revealed the presence of unreacted starting materials.

(d) without any catalyst/additive:

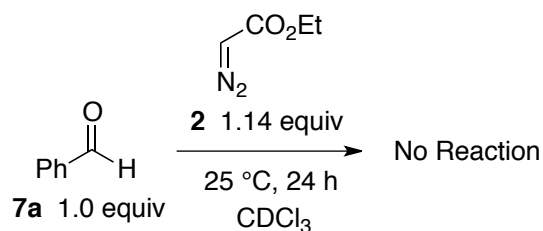

**Procedure:** To a 10 mL flame-dried single-necked round bottom flask, equipped with a stir bar and a rubber septum and filled with argon was added benzaldehyde **7a** (52.0  $\mu\text{L}$ , 0.525 mmol, 1.00 equiv.), ethyl diazoacetate **2** (62.0  $\mu\text{L}$ , 0.600 mmol, 1.14 equiv),  $\text{Ph}_3\text{CH}$  (12.2 mg, 0.500 mmol) and  $\text{CDCl}_3$  (1 mL). The resultant mixture was stirred for 24 h at room temperature. The resulting solution was then directly transferred to a NMR tube and was then subjected to NMR analysis. The crude NMR revealed the presence of unreacted starting materials.

#### D. Different protocols for MCAZ: Procedures (I, IIA-B, IIIA-C)

As shown in Table 2 of the manuscript, the present work represents a true multi-component aziridination reaction.

**Procedure I: Catalyst @  $80\text{ }^\circ\text{C}$ , 0.5 h and EDA **2** added after 2 h after the addition of aldehyde **7a**.**

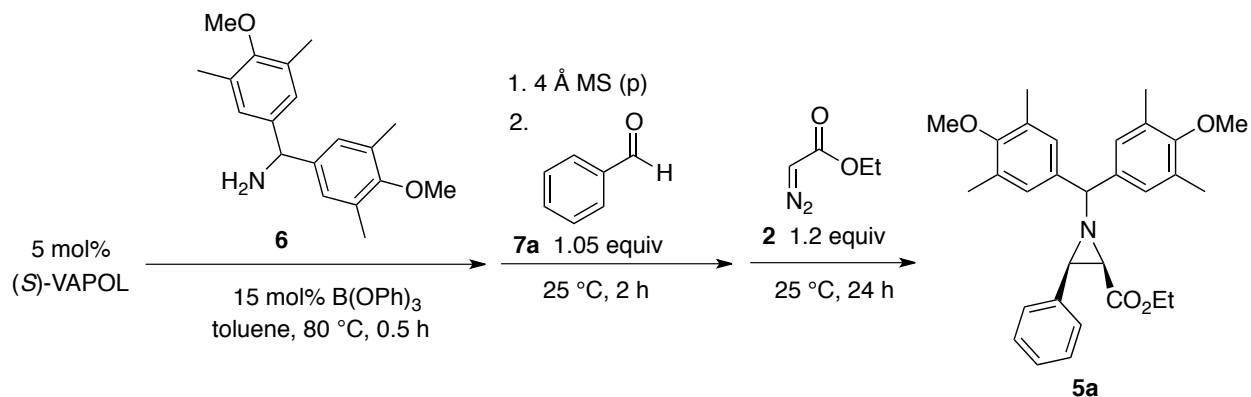

**(2R,3R)-ethyl-1-(bis(4-methoxy-3,5-dimethylphenyl)methyl)-3-phenylaziridine-2-**

**carboxylate 5a:** To a 10 mL flame-dried home-made Schlenk flask, prepared from a single-necked 25 mL pear-shaped flask that had its 14/20 glass joint replaced with a high vacuum threaded Teflon valve, equipped with a stir bar and filled with argon was added (*S*)-VAPOL (14



mg, 0.025 mmol), B(OPh)<sub>3</sub> (22 mg, 0.075 mmol) and amine **6** (149.7 mg, 0.5000 mmol). Under an argon flow through the side-arm of the Schlenk flask, dry toluene (2 mL) was added. The flask was sealed by closing the Teflon valve, and then placed in an oil bath (80 °C) for 0.5 h. The flask was then allowed to cool to room temperature and open to argon through side-arm of the Schlenk flask. To the flask containing the catalyst was added the 4Å Molecular Sieves (150 mg, freshly flame-dried) and aldehyde **7a** (52.0 µL, 0.525 mmol, 1.05 equiv). The resulting mixture was allowed to stir for 2 h at ambient temperature. Thereafter, ethyl diazoacetate (EDA) **2** (62 µL, 0.60 mmol, 1.2 equiv) was added. The resulting mixture was stirred for 24 h at room temperature. The reaction was diluted by addition of hexane (6 mL). The reaction mixture was then filtered through a Celite pad to a 100 mL round bottom flask. The reaction flask was rinsed with EtOAc (3 mL × 3) and the rinse was filtered through the same Celite pad. The resulting solution was then concentrated *in vacuo* followed by exposure to high vacuum (0.05 mm Hg) for 1 h to afford the crude aziridine as an off-white solid.

The *cis/trans* ratio was determined by comparing the <sup>1</sup>H NMR integration of the ring methine protons for each aziridine in the crude reaction mixture. The *cis* (*J* = 7-8 Hz) and the *trans* (*J* = 2-3 Hz) coupling constants were used to differentiate the two isomers. The yields of the acyclic enamine side products **18a** and **19a** were determined by <sup>1</sup>H NMR analysis of the crude reaction mixture by integration of the *N*-H proton relative to the that of the *cis*-aziridine methine protons with the aid of the isolated yield of the *cis*-aziridine. Purification of the crude aziridine by silica gel chromatography (30 mm × 300 mm column, 9:1 hexanes/EtOAc as eluent, gravity column) afforded pure *cis*-aziridine **5a** as a white solid (mp 107-108 °C on 99.8% ee material) in 92 % isolated yield (218 mg, 0.460 mmol); *cis/trans*: >50:1. Enamine side products: <1 % yield of **18a** and <1% yield of **19a**. The optical purity of **5a** was determined to be 95 % *ee* by HPLC analysis (CHIRALCEL OD-H column, 99:1 hexane/2-propanol at 226nm, flow-rate: 0.7 mL/min): retention times; *R*<sub>t</sub> = 9.26 min (major enantiomer, **5a**) and *R*<sub>t</sub> = 12.52 min (minor enantiomer, *ent*-**5a**).

**Procedure IIA: Catalyst @ 80 °C, 0.5 h and EDA 2 added immediately after the addition of the aldehyde 7a.**

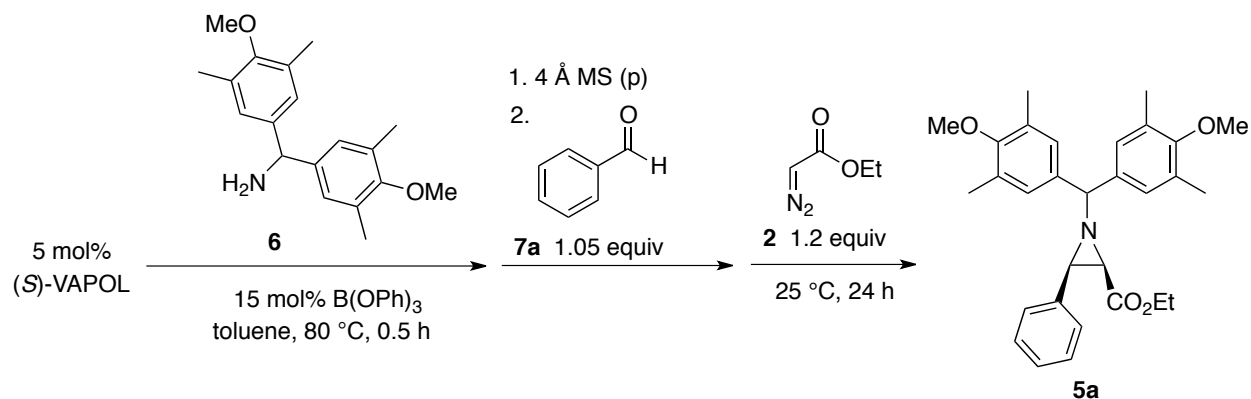

**(2R,3R)-ethyl-1-(bis(4-methoxy-3,5-dimethylphenyl)methyl)-3-phenylaziridine-2-**

**carboxylate 5a:** To a 10 mL flame-dried home-made Schlenk flask, prepared from a single-necked 25 mL pear-shaped flask that had its 14/20 glass joint replaced with a high vacuum threaded Teflon valve, equipped with a stir bar and filled with argon was added (S)-VAPOL (14 mg, 0.025 mmol), B(OPh)<sub>3</sub> (22 mg, 0.075 mmol) and amine **6** (149.7 mg, 0.5000 mmol). Under an argon flow through the side-arm of the Schlenk flask, dry toluene (2 mL) was added. The flask was sealed by closing the Teflon valve, and then placed in an oil bath (80 °C) for 0.5 h. The flask was then allowed to cool to room temperature and open to argon through side-arm of the Schlenk flask. To the flask containing the catalyst was added the 4Å Molecular Sieves (150 mg, freshly flame-dried) and aldehyde **7a** (52.0 µL, 0.525 mmol, 1.05 equiv). To this solution was rapidly added ethyl diazoacetate (EDA) **2** (62 µL, 0.60 mmol, 1.2 equiv). The resulting mixture was stirred for 24 h at room temperature. The reaction was diluted by addition of hexane (6 mL). The reaction mixture was then filtered through a Celite pad to a 100 mL round bottom flask. The reaction flask was rinsed with EtOAc (3 mL × 3) and the rinse was filtered through the same Celite pad. The resulting solution was then concentrated *in vacuo* followed by exposure to high vacuum (0.05 mm Hg) for 1 h to afford the crude aziridine as an off-white solid.

The *cis/trans* ratio was determined by comparing the <sup>1</sup>H NMR integration of the ring methine protons for each aziridine in the crude reaction mixture. The *cis* (*J* = 7-8 Hz) and the *trans* (*J* = 2-3 Hz) coupling constants were used to differentiate the two isomers. The yields of

the acyclic enamine side products **18a** and **19a** were determined by  $^1\text{H}$  NMR analysis of the crude reaction mixture by integration of the *N*-H proton relative to the that of the *cis*-aziridine methine protons with the aid of the isolated yield of the *cis*-aziridine. Purification of the crude aziridine by silica gel chromatography (30 mm  $\times$  300 mm column, 9:1 hexanes/EtOAc as eluent, gravity column) afforded pure *cis*-aziridine **5a** as a white solid (mp 107-108  $^\circ\text{C}$  on 99.8% *ee* material) in 97 % isolated yield (230 mg, 0.485 mmol); *cis/trans*: >50:1. Enamine side products: <1 % yield of **18a** and <1% yield of **19a**. The optical purity of **5a** was determined to be 98 % *ee* by HPLC analysis (CHIRALCEL OD-H column, 99:1 hexane/2-propanol at 226nm, flow-rate: 0.7 mL/min): retention times;  $R_t = 9.26$  min (major enantiomer, **5a**) and  $R_t = 12.52$  min (minor enantiomer, *ent*-**5a**).

**Procedure IIB: Pre-catalyst followed by the addition of amine 6 and stirring @ 80  $^\circ\text{C}$ , 0.5 h and then EDA 2 added immediately after the addition of the aldehyde 7a.**

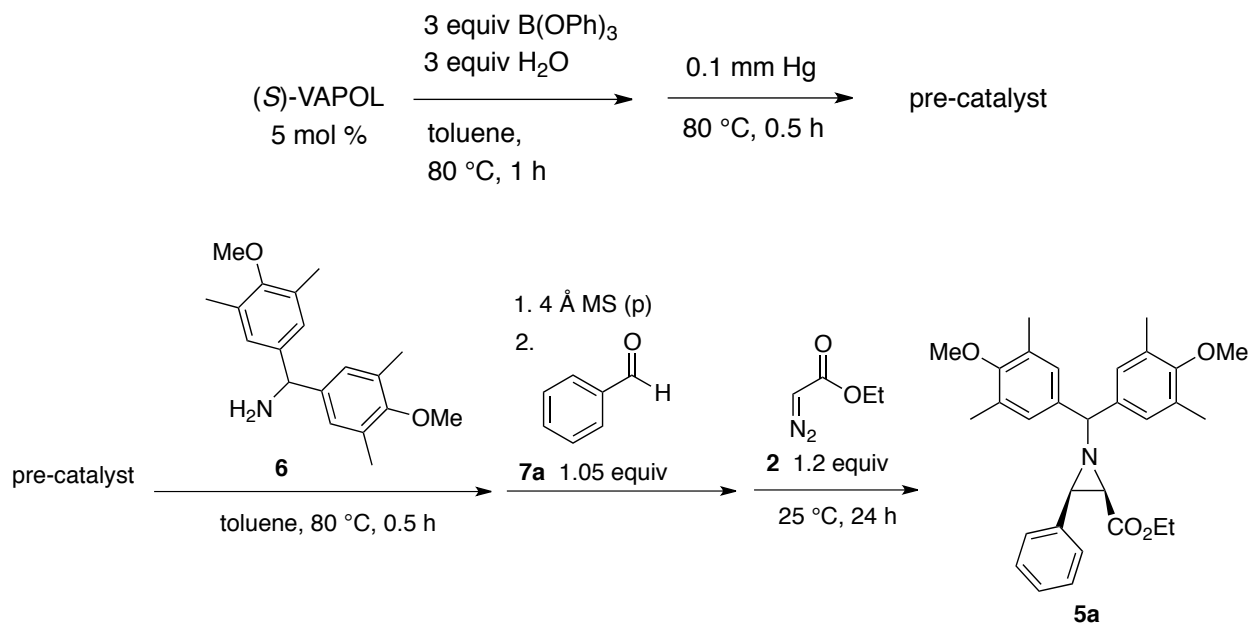

**(2*R*,3*R*)-ethyl-1-(bis(4-methoxy-3,5-dimethylphenyl)methyl)-3-phenylaziridine-2-**

**carboxylate 5a:** To a 10 mL flame-dried home-made Schlenk flask, prepared from a single-necked 25 mL pear-shaped flask that had its 14/20 glass joint replaced with a high vacuum threaded Teflon valve, equipped with a stir bar and filled with argon was added *(S)*-VAPOL (14 mg, 0.025 mmol),  $\text{B}(\text{OPh})_3$  (22 mg, 0.075 mmol). Under an argon flow through the side-arm of

the Schlenk flask, dry toluene (2 mL) was added through the top of the Teflon valve to dissolve the two reagents and this was followed by the addition of water (1.4  $\mu$ L, 0.075 mmol). The flask was sealed by closing the Teflon valve, and then placed in an 80 °C (oil bath) for 1 h. After 1 h, a vacuum (0.5 mm Hg) was carefully applied by slightly opening the Teflon valve to remove the volatiles. After the volatiles are removed completely, a full vacuum is applied and is maintained for a period of 30 min at a temperature of 80 °C (oil bath). The flask was then allowed to cool to room temperature and opened to argon through the side-arm of the Schlenk flask. To the flask containing the pre-catalyst was added the amine **6** (149.7 mg, 0.5000 mmol) and then dry toluene (1 mL) under an argon flow through side-arm of the Schlenk flask. The flask was sealed by closing the Teflon valve, and then placed in an oil bath (80 °C) for 0.5 h. The flask was then allowed to cool to room temperature and open to argon through side-arm of the Schlenk flask. To the flask containing the precatalyst was added the 4Å Molecular Sieves (150 mg, freshly flame-dried) and aldehyde **7a** (52.0  $\mu$ L, 0.525 mmol, 1.05 equiv). To this solution was rapidly added ethyl diazoacetate (EDA) **2** (62  $\mu$ L, 0.60 mmol, 1.2 equiv). The resulting mixture was stirred for 24 h at room temperature. The reaction was diluted by addition of hexane (6 mL). The reaction mixture was then filtered through a Celite pad to a 100 mL round bottom flask. The reaction flask was rinsed with EtOAc (3 mL  $\times$  3) and the rinse was filtered through the same Celite pad. The resulting solution was then concentrated *in vacuo* followed by exposure to high vacuum (0.05 mm Hg) for 1 h to afford the crude aziridine as an off-white solid.

The *cis/trans* ratio was determined by comparing the <sup>1</sup>H NMR integration of the ring methine protons for each aziridine in the crude reaction mixture. The *cis* ( $J = 7-8$  Hz) and the *trans* ( $J = 2-3$  Hz) coupling constants were used to differentiate the two isomers. The yields of the acyclic enamine side products **18a** and **19a** were determined by <sup>1</sup>H NMR analysis of the crude reaction mixture by integration of the *N*-H proton relative to the that of the *cis*-aziridine methine protons with the aid of the isolated yield of the *cis*-aziridine. Purification of the crude aziridine by silica gel chromatography (30 mm  $\times$  300 mm column, 9:1 hexanes/EtOAc as eluent, gravity column) afforded pure *cis*-aziridine **5a** as a white solid (mp 107-108 °C on 99.8% *ee* material) in 98 % isolated yield (232 mg, 0.490 mmol); *cis/trans*: >50:1. Enamine side products: <1 % yield of **18a** and <1% yield of **19a**. The optical purity of **5a** was determined to be 98 % *ee* by HPLC analysis (CHIRALCEL OD-H column, 99:1 hexane/2-propanol at 226nm, flow-rate:

0.7 mL/min): retention times;  $R_t = 9.26$  min (major enantiomer, **5a**) and  $R_t = 12.52$  min (minor enantiomer, *ent*-**5a**).

**Procedure IIIA: Catalyst @ 25 °C, 1 h and EDA 2 added immediately after the addition of the aldehyde 7a.**

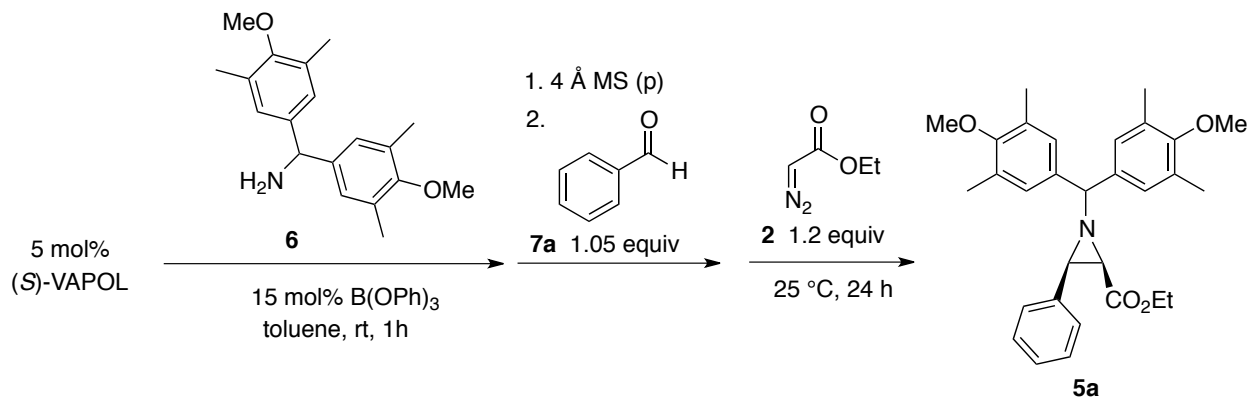

**(2*R*,3*R*)-ethyl-1-(bis(4-methoxy-3,5-dimethylphenyl)methyl)-3-phenylaziridine-2-**

**carboxylate 5a:** To a 10 mL flame-dried single-necked round bottom flask equipped with a stir bar and filled with argon was added (*S*)-VAPOL (14 mg, 0.025 mmol),  $B(OPh)_3$  (22 mg, 0.075 mmol) and amine **6** (149.7 mg, 0.5000 mmol). Dry toluene (1 mL) was added under an argon atmosphere to dissolve the reagents. The flask was fitted with a rubber septum and a nitrogen balloon. The reaction mixture was stirred at room temperature for 1 h. Thereafter, 4 Å Molecular Sieves (150 mg, freshly flame-dried) was added followed by the addition of the aldehyde **7a** (52.0  $\mu$ L, 0.525 mmol, 1.05 equiv). To this solution was rapidly added ethyl diazoacetate (EDA) **2** (62  $\mu$ L, 0.60 mmol, 1.2 equiv). The resulting mixture was stirred for 24 h at room temperature. The reaction was diluted by addition of hexane (6 mL). The reaction mixture was then filtered through a Celite pad to a 100 mL round bottom flask. The reaction flask was rinsed with EtOAc (3 mL  $\times$  3) and the rinse was filtered through the same Celite pad. The resulting solution was then concentrated *in vacuo* followed by exposure to high vacuum (0.05 mm Hg) for 1 h to afford the crude aziridine as an off-white solid.

The *cis/trans* ratio was determined by comparing the  $^1H$  NMR integration of the ring methine protons for each aziridine in the crude reaction mixture. The *cis* ( $J = 7-8$  Hz) and the *trans* ( $J = 2-3$  Hz) coupling constants were used to differentiate the two isomers. The yields of the acyclic enamine side products **18a** and **19a** were determined by  $^1H$  NMR analysis of the

crude reaction mixture by integration of the *N*-H proton relative to the that of the *cis*-aziridine methine protons with the aid of the isolated yield of the *cis*-aziridine. Purification of the crude aziridine by silica gel chromatography (30 mm × 300 mm column, 9:1 hexanes/EtOAc as eluent, gravity column) afforded pure *cis*-aziridine **5a** as a white solid (mp 107-108 °C on 99.8% ee material) in 97 % isolated yield (230 mg, 0.490 mmol); *cis/trans*: >50:1. Enamine side products: <1 % yield of **18a** and <1 % yield of **19a**. The optical purity of **5a** was determined to be 98 % ee by HPLC analysis (CHIRALCEL OD-H column, 99:1 hexane/2-propanol at 226nm, flow-rate: 0.7 mL/min): retention times;  $R_t = 9.26$  min (major enantiomer, **5a**) and  $R_t = 12.52$  min (minor enantiomer, *ent*-**5a**).

**Procedure IIIB: Pre-catalyst followed by the addition of amine 6 and stirring @ 25 °C, 1 h and then EDA 2 added immediately after the addition of the aldehyde 7a.**

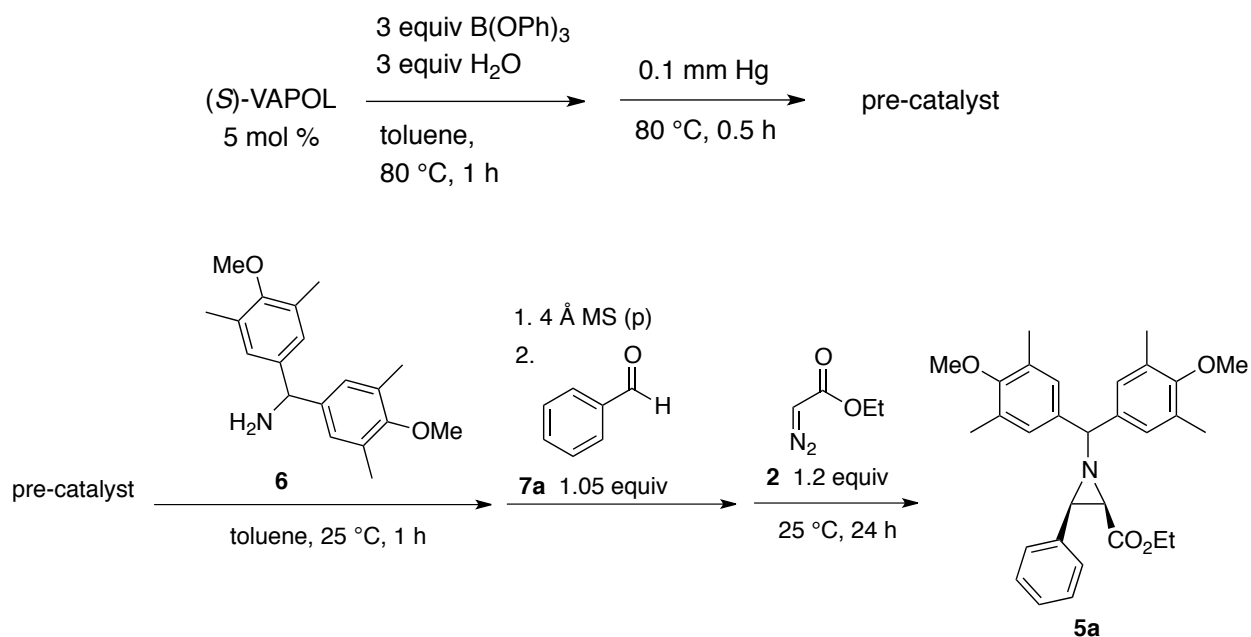

**(2*R*,3*R*)-ethyl-1-(bis(4-methoxy-3,5-dimethylphenyl)methyl)-3-phenylaziridine-2-**

**carboxylate 5a:** To a 10 mL flame-dried home-made Schlenk flask, prepared from a single-necked 25 mL pear-shaped flask that had its 14/20 glass joint replaced with a high vacuum threaded Teflon valve, equipped with a stir bar and filled with argon was added (S)-VAPOL (14 mg, 0.025 mmol), B(OPh)<sub>3</sub> (22 mg, 0.075 mmol). Under an argon flow through the side-arm of the Schlenk flask, dry toluene (2 mL) was added through the top of the Teflon valve to dissolve the two reagents and this was followed by the addition of water (1.4 μL, 0.075 mmol). The flask

was sealed by closing the Teflon valve, and then placed in an 80 °C (oil bath) for 1 h. After 1 h, a vacuum (0.5 mm Hg) was carefully applied by slightly opening the Teflon valve to remove the volatiles. After the volatiles are removed completely, a full vacuum is applied and is maintained for a period of 30 min at a temperature of 80 °C (oil bath). The flask was then allowed to cool to room temperature and opened to argon through the side-arm of the Schlenk flask. To the flask containing the pre-catalyst was added the amine **6** (149.7 mg, 0.5000 mmol) and then dry toluene (1 mL) under an argon flow through side-arm of the Schlenk flask. The flask was sealed by closing the Teflon valve, and then the resulting mixture was allowed to stir at room temperature for 1 h. The flask was then open to argon through side-arm of the Schlenk flask. To the flask containing the catalyst was added the 4Å Molecular Sieves (150 mg, freshly flame-dried) and aldehyde **7a** (52.0 µL, 0.525 mmol, 1.05 equiv). To this solution was rapidly added ethyl diazoacetate (EDA) **2** (62 µL, 0.60 mmol, 1.2 equiv). The resulting mixture was stirred for 24 h at room temperature. The reaction was diluted by addition of hexane (6 mL). The reaction mixture was then filtered through a Celite pad to a 100 mL round bottom flask. The reaction flask was rinsed with EtOAc (3 mL × 3) and the rinse was filtered through the same Celite pad. The resulting solution was then concentrated *in vacuo* followed by exposure to high vacuum (0.05 mm Hg) for 1 h to afford the crude aziridine as an off-white solid.

The *cis/trans* ratio was determined by comparing the <sup>1</sup>H NMR integration of the ring methine protons for each aziridine in the crude reaction mixture. The *cis* ( $J = 7-8$  Hz) and the *trans* ( $J = 2-3$  Hz) coupling constants were used to differentiate the two isomers. The yields of the acyclic enamine side products **18a** and **19a** were determined by <sup>1</sup>H NMR analysis of the crude reaction mixture by integration of the *N*-H proton relative to the that of the *cis*-aziridine methine protons with the aid of the isolated yield of the *cis*-aziridine. Purification of the crude aziridine by silica gel chromatography (30 mm × 300 mm column, 9:1 hexanes/EtOAc as eluent, gravity column) afforded pure *cis*-aziridine **5a** as a white solid (mp 107-108 °C on 99.8% ee material) in 94 % isolated yield (223 mg, 0.470 mmol); *cis/trans*: >50:1. Enamine side products: <1 % yield of **18a** and <1% yield of **19a**. The optical purity of **5a** was determined to be 98 % ee by HPLC analysis (CHIRALCEL OD-H column, 99:1 hexane/2-propanol at 226nm, flow-rate: 0.7 mL/min): retention times;  $R_t = 9.26$  min (major enantiomer, **5a**) and  $R_t = 12.52$  min (minor enantiomer, *ent-5a*).

**Procedure IIIC: Catalyst @ 25 °C, 1 h and EDA 2 added immediately after the addition of the aldehyde 7a (0.6 equiv with respect to amine 6).**

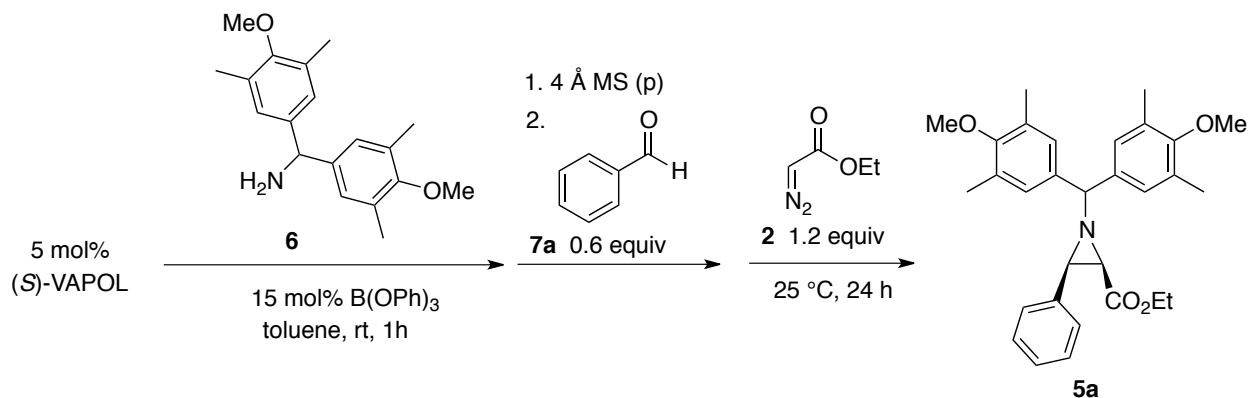

**(2R,3R)-ethyl-1-(bis(4-methoxy-3,5-dimethylphenyl)methyl)-3-phenylaziridine-2-carboxylate 5a:** The procedure is exactly similar to procedure IIIA except that 0.6 equiv of benzaldehyde 7a was added. No aziridine 5a was observed from crude NMR analysis.

#### E. Different order of addition of reagents in MCAZ: Procedures (IV-VII)

**Procedure IV: Catalyst + EDA 2 @ 25 °C, 1 h and then addition of the aldehyde 7a.**

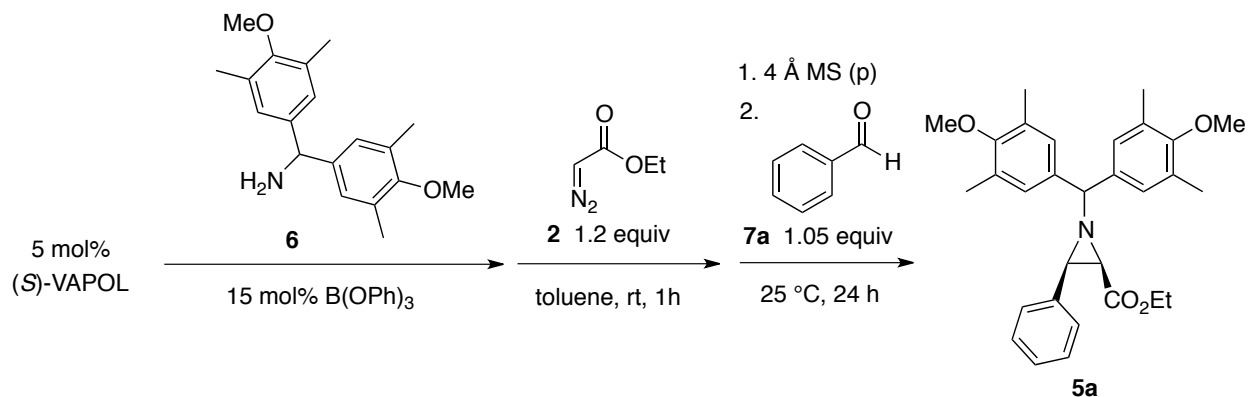

**(2R,3R)-ethyl-1-(bis(4-methoxy-3,5-dimethylphenyl)methyl)-3-phenylaziridine-2-carboxylate 5a:** To a 10 mL flame-dried single-necked round bottom flask equipped with a stir bar and filled with argon was added in the following order (S)-VAPOL (14 mg, 0.025 mmol),



B(OPh)<sub>3</sub> (22 mg, 0.075 mmol), amine **6** (149.7 mg, 0.5000 mmol) and ethyl diazoacetate (EDA) **2** (62  $\mu$ L, 0.60 mmol, 1.2 equiv). Dry toluene (1 mL) was added under an argon atmosphere to dissolve the reagents. The flask was fitted with a rubber septum and a nitrogen balloon. The reaction mixture was stirred at room temperature for 1 h. Thereafter, 4Å Molecular Sieves (150 mg, freshly flame-dried) was added followed by the addition of the aldehyde **7a** (52.0  $\mu$ L, 0.525 mmol, 1.05 equiv). The resulting mixture was stirred for 24 h at room temperature. The reaction was diluted by addition of hexane (6 mL). The reaction mixture was then filtered through a Celite pad to a 100 mL round bottom flask. The reaction flask was rinsed with EtOAc (3 mL  $\times$  3) and the rinse was filtered through the same Celite pad. The resulting solution was then concentrated *in vacuo* followed by exposure to high vacuum (0.05 mm Hg) for 1 h to afford the crude aziridine as an off-white solid.

The *cis/trans* ratio was determined by comparing the <sup>1</sup>H NMR integration of the ring methine protons for each aziridine in the crude reaction mixture. The *cis* ( $J = 7-8$  Hz) and the *trans* ( $J = 2-3$  Hz) coupling constants were used to differentiate the two isomers. The yields of the acyclic enamine side products **18a** and **19a** were determined by <sup>1</sup>H NMR analysis of the crude reaction mixture by integration of the *N*-H proton relative to the that of the *cis*-aziridine methine protons with the aid of the isolated yield of the *cis*-aziridine. Purification of the crude aziridine by silica gel chromatography (30 mm  $\times$  300 mm column, 9:1 hexanes/EtOAc as eluent, gravity column) afforded pure *cis*-aziridine **5a** as a white solid (mp 107-108 °C on 99.8% ee material) in 94 % isolated yield (223 mg, 0.47 mmol); *cis/trans*: >50:1. Enamine side products: <1 % yield of **18a** and <1 % yield of **19a**. The optical purity of **5a** was determined to be 98 % *ee* by HPLC analysis (CHIRALCEL OD-H column, 99:1 hexane/2-propanol at 226nm, flow-rate: 0.7 mL/min): retention times;  $R_t = 9.26$  min (major enantiomer, **5a**) and  $R_t = 12.52$  min (minor enantiomer, *ent-5a*).

**Procedure V: Amine 6 added at the end prior to the addition of toluene.**

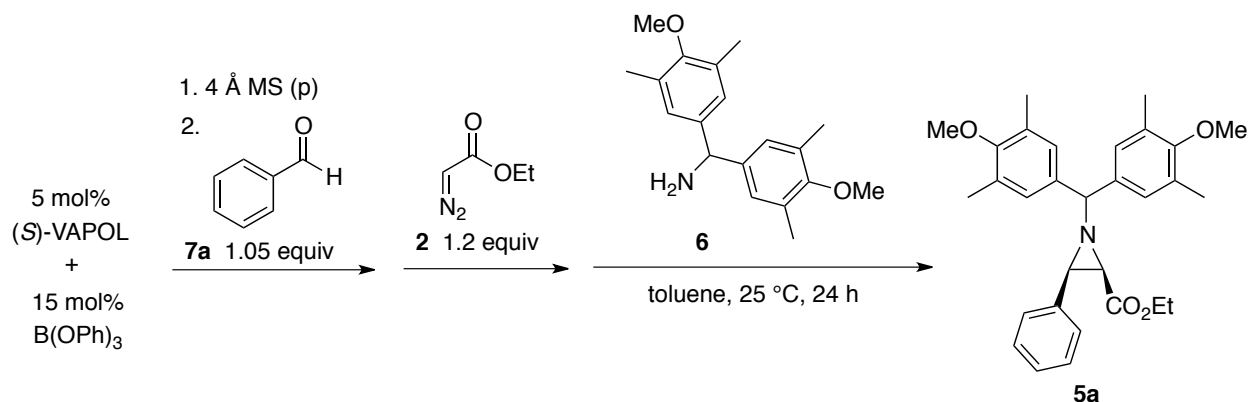

**(2R,3R)-ethyl-1-(bis(4-methoxy-3,5-dimethylphenyl)methyl)-3-phenylaziridine-2-**

**carboxylate 5a:** To a 10 mL flame-dried single-necked round bottom flask equipped with a stir bar and filled with argon was added in following order (S)-VAPOL (14 mg, 0.025 mmol), B(OPh)<sub>3</sub> (22 mg, 0.075 mmol), 4Å Molecular Sieves (150 mg, freshly flame-dried), aldehyde **7a** (52.0 μL, 0.525 mmol, 1.05 equiv), ethyl diazoacetate (EDA) **2** (62 μL, 0.60 mmol, 1.2 equiv) and amine **6** (149.7 mg, 0.5000 mmol). Dry toluene (1 mL) was added under an argon atmosphere to dissolve the reagents. The flask was fitted with a rubber septum and a nitrogen balloon. The reaction mixture was stirred for 24 h at room temperature. The reaction was diluted by addition of hexane (6 mL). The reaction mixture was then filtered through a Celite pad to a 100 mL round bottom flask. The reaction flask was rinsed with EtOAc (3 mL × 3) and the rinse was filtered through the same Celite pad. The resulting solution was then concentrated *in vacuo* followed by exposure to high vacuum (0.05 mm Hg) for 1 h to afford the crude aziridine as an off-white solid. Purification of the crude aziridine by silica gel chromatography (30 mm × 300 mm column, 9:1 hexanes/EtOAc as eluent, gravity column) afforded pure *cis*-aziridine **5a** as a white solid (mp 107-108 °C on 99.8% ee material) in 85 % isolated yield (201 mg, 0.430 mmol); *cis/trans*: >50:1. Enamine side products: 2 % yield of **18a** and 1 % yield of **19a**. The optical purity of **5a** was determined to be 98 % ee by HPLC analysis (CHIRALCEL OD-H column, 99:1 hexane/2-propanol at 226nm, flow-rate: 0.7 mL/min): retention times; R<sub>t</sub> = 9.26 min (major enantiomer, **5a**) and R<sub>t</sub> = 12.52 min (minor enantiomer, *ent-5a*). A repeat of this reaction also gave **5a** in 85 % yield. This is the <sup>1</sup>H NMR yield determined by integration against an internal standard (Ph<sub>3</sub>CH).

**Procedure VI: Amine 6 added at the end after 2 min stirring of a mixture of VAPOL 3, B(OPh)<sub>3</sub>, aldehyde 7a and EDA 2 in toluene.**

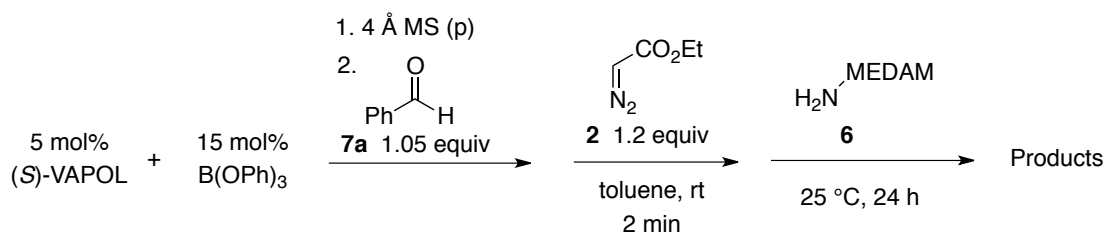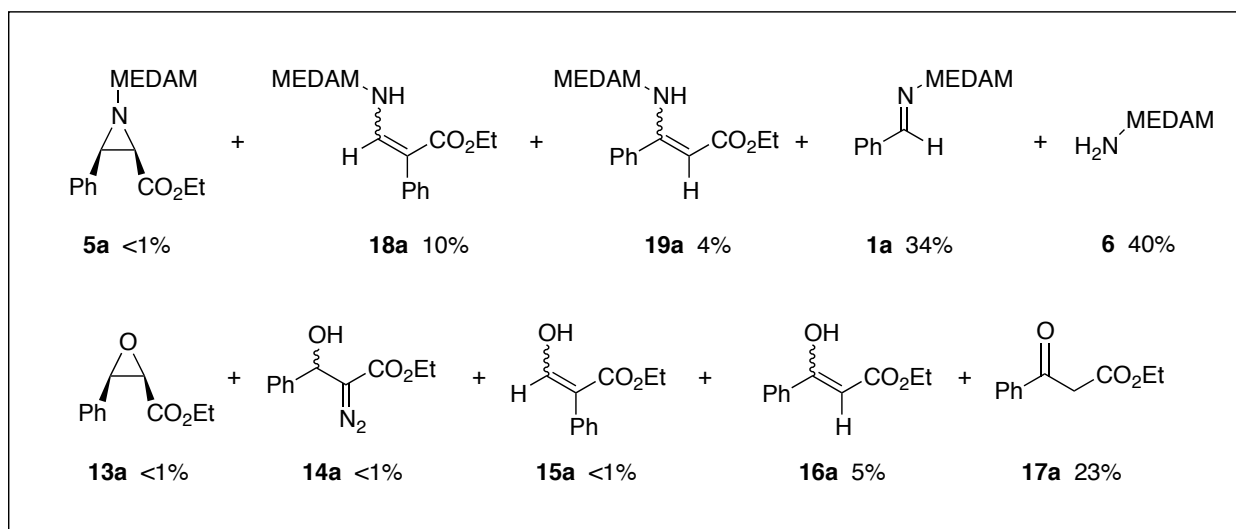

To a 10 mL flame-dried single-necked round bottom flask equipped with a stir bar and filled with argon was added in the following order (S)-VAPOL (14 mg, 0.025 mmol), B(OPh)<sub>3</sub> (22 mg, 0.075 mmol), 4Å Molecular Sieves (150 mg, freshly flame-dried), aldehyde **7a** (52.0 µL, 0.525 mmol, 1.05 equiv), ethyl diazoacetate (EDA) **2** (62 µL, 0.60 mmol, 1.2 equiv). Dry toluene (1 mL) was added under an argon atmosphere to dissolve the reagents. The flask was fitted with a rubber septum and a nitrogen balloon. The mixture was stirred for 2 min followed by the addition of amine **6** (149.7 mg, 0.5000 mmol). The reaction mixture was stirred for 24 h at room temperature. The reaction was diluted by addition of hexane (6 mL). The reaction mixture was then filtered through a Celite pad to a 100 mL round bottom flask. The reaction flask was rinsed with EtOAc (3 mL × 3) and the rinse was filtered through the same Celite pad. The resulting solution was then concentrated *in vacuo* followed by exposure to high vacuum (0.05 mm Hg) for 1 h to afford the crude mixture. An internal standard Ph<sub>3</sub>CH (12.2 mg, 0.500 mmol) was added and subjected to NMR analysis. The crude NMR revealed the presence of several products as

shown in the reaction scheme. The presence of each product was confirmed by characteristic peaks (as discussed in section C) in the  $^1\text{H}$  NMR previously published for these compounds and the amount of each was quantified by integration against an internal standard ( $\text{Ph}_3\text{CH}$ ).

**Procedure VII: Same as Procedure VI except that amine 6 is not added.**

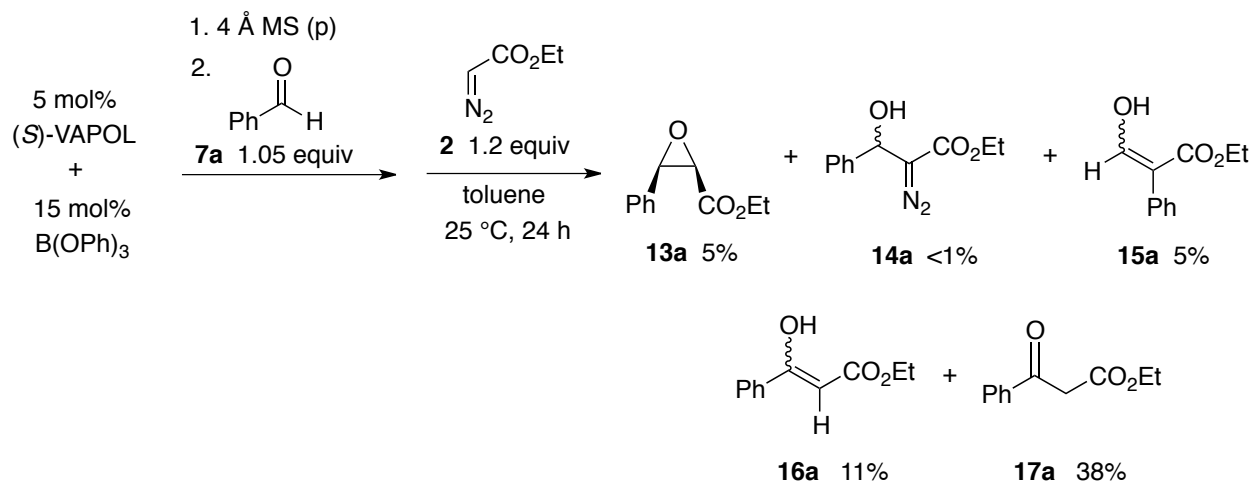

To a 10 mL flame-dried single-necked round bottom flask equipped with a stir bar and filled with argon was added in the following order (S)-VAPOL (14 mg, 0.025 mmol),  $\text{B(OPh)}_3$  (22 mg, 0.075 mmol), 4Å Molecular Sieves (150 mg, freshly flame-dried), aldehyde **7a** (52.0  $\mu\text{L}$ , 0.525 mmol, 1.05 equiv), ethyl diazoacetate (EDA) **2** (62  $\mu\text{L}$ , 0.60 mmol, 1.2 equiv). Dry toluene (1 mL) was added under an argon atmosphere to dissolve the reagents. The flask was fitted with a rubber septum and a nitrogen balloon. The resulting mixture was stirred for 24 h at room temperature. The reaction was diluted by addition of hexane (6 mL). The reaction mixture was then filtered through a Celite pad to a 100 mL round bottom flask. The reaction flask was rinsed with EtOAc (3 mL  $\times$  3) and the rinse was filtered through the same Celite pad. The resulting solution was then concentrated *in vacuo* followed by exposure to high vacuum (0.05 mm Hg) for 1 h to afford the crude mixture. An internal standard  $\text{Ph}_3\text{CH}$  (12.2 mg, 0.500 mmol) was added and subjected to NMR analysis. The crude NMR revealed the presence of several products as shown in the reaction scheme. The crude NMR revealed the presence of several products as shown in the reaction scheme. The presence of each product was confirmed by characteristic peaks (as discussed in section C) in the  $^1\text{H}$  NMR previously published for these compounds.

There was also mono-alkylated (*S*)-VAPOL derivative **12** in 37% yield (with respect to (*S*)-VAPOL).

**Procedure VI in CDCl<sub>3</sub> : Amine 6 added at the end after 2 min stirring of a mixture of VAPOL 3, B(OPh)<sub>3</sub>, aldehyde 7a and EDA 2 in CDCl<sub>3</sub>.**

This reaction was run in CDCl<sub>3</sub> because the crude reaction mixture in toluene was stripped of volatiles before the <sup>1</sup>H NMR was taken and some of the products many have been lost.

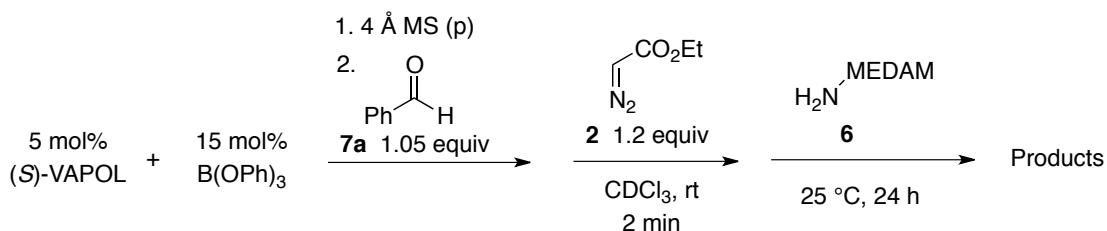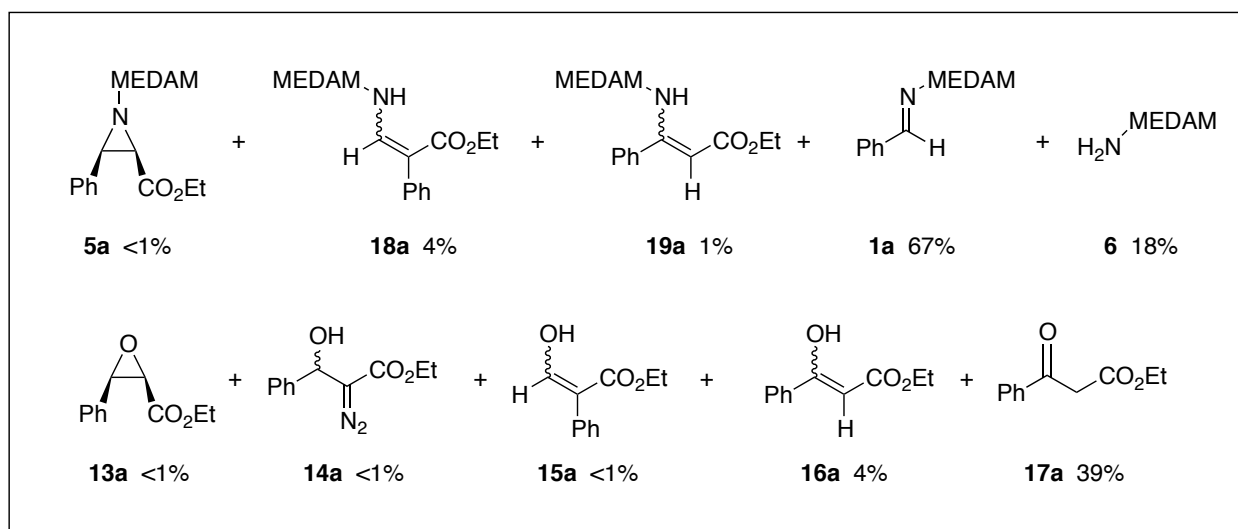

To a 10 mL flame-dried single-necked round bottom flask equipped with a stir bar and filled with argon was added (*S*)-VAPOL in the following order (14 mg, 0.025 mmol), B(OPh)<sub>3</sub> (22 mg, 0.075 mmol), 4Å Molecular Sieves (150 mg, freshly flame-dried), aldehyde **7a** (52.0 μL, 0.525 mmol, 1.05 equiv), ethyl diazoacetate (EDA) **2** (62 μL, 0.60 mmol, 1.2 equiv). Dry toluene (1 mL) was added under an argon atmosphere to dissolve the reagents. The flask was fitted with a rubber septum and a nitrogen balloon. The mixture was stirred for 2 min followed by the addition of amine **6** (149.7 mg, 0.5000 mmol). The reaction mixture was stirred for 24 h at room temperature. After 24 h, an internal standard Ph<sub>3</sub>CH (12.2 mg, 0.500 mmol) was added. The resulting solution was then directly transferred to a NMR tube utilizing a filter syringe

(Corning® syringe filters, Aldrich) to remove the 4Å Molecular Sieves. It was then subjected to NMR analysis. The crude NMR revealed the presence of several products as shown in the reaction scheme. The presence of each product was confirmed by characteristic peaks (as discussed in section C) in the <sup>1</sup>H NMR previously published for these compounds. There was also mono-alkylated (*S*)-VAPOL derivative **12** in 28% yield (with respect to (*S*)-VAPOL).

**Procedure VII in CDCl<sub>3</sub>: Same as Procedure VI except that amine 6 is not added (in CDCl<sub>3</sub>).**

This reaction was run in CDCl<sub>3</sub> because the crude reaction mixture in toluene was stripped of volatiles before the <sup>1</sup>H NMR was taken and some of the products many have been lost.

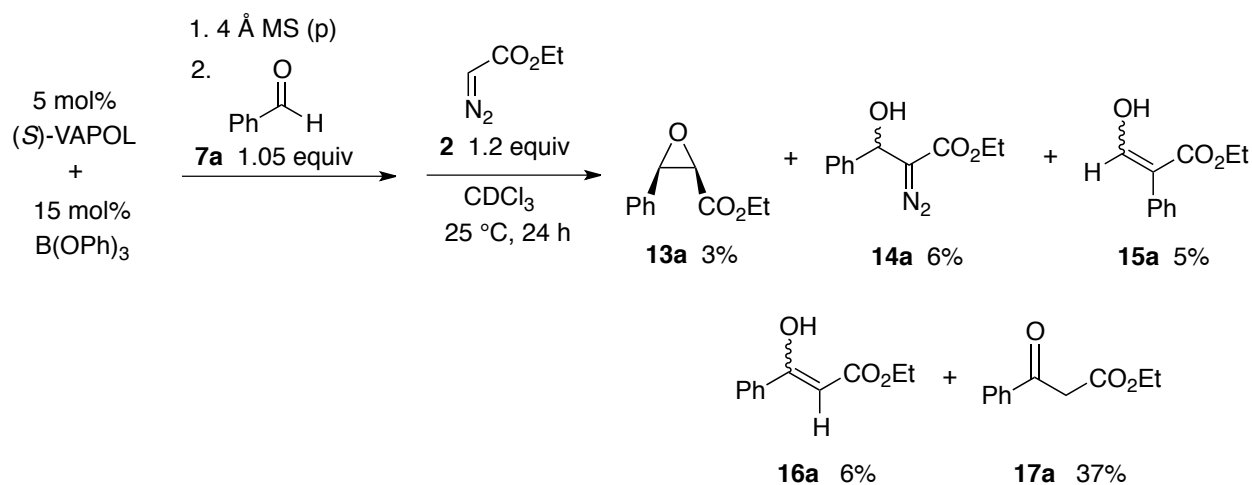

To a 10 mL flame-dried single-necked round bottom flask equipped with a stir bar and filled with argon was added in the following order (*S*)-VAPOL (14 mg, 0.025 mmol), B(OPh)<sub>3</sub> (22 mg, 0.075 mmol), 4Å Molecular Sieves (150 mg, freshly flame-dried), aldehyde **7a** (52.0 μL, 0.525 mmol, 1.05 equiv), ethyl diazoacetate (EDA) **2** (62 μL, 0.60 mmol, 1.2 equiv). Dry toluene (1 mL) was added under an argon atmosphere to dissolve the reagents. The flask was fitted with a rubber septum and a nitrogen balloon. The resulting mixture was stirred for 24 h at room temperature. After 24 h, an internal standard Ph<sub>3</sub>CH (12.2 mg, 0.5000 mmol) was added. The resulting solution was then directly transferred to a NMR tube utilizing a filter syringe (Corning® syringe filters, Aldrich) to remove the 4Å Molecular Sieves. It was then subjected to NMR analysis. The crude NMR revealed the presence of several products as shown in the reaction scheme. The presence of each product was confirmed by characteristic peaks (as

discussed in section C) in the  $^1\text{H}$  NMR previously published for these compounds. There was also 26% of unreacted benzaldehyde **7a**. There was also mono-alkylated (*S*)-VAPOL derivative **12** in 11% yield (with respect to (*S*)-VAPOL).

## F. Mechanistic Study of multi-component aziridination reaction

### a) MCAZ with 0.9 equivalents of benzaldehyde **7a** and amine **6'**:

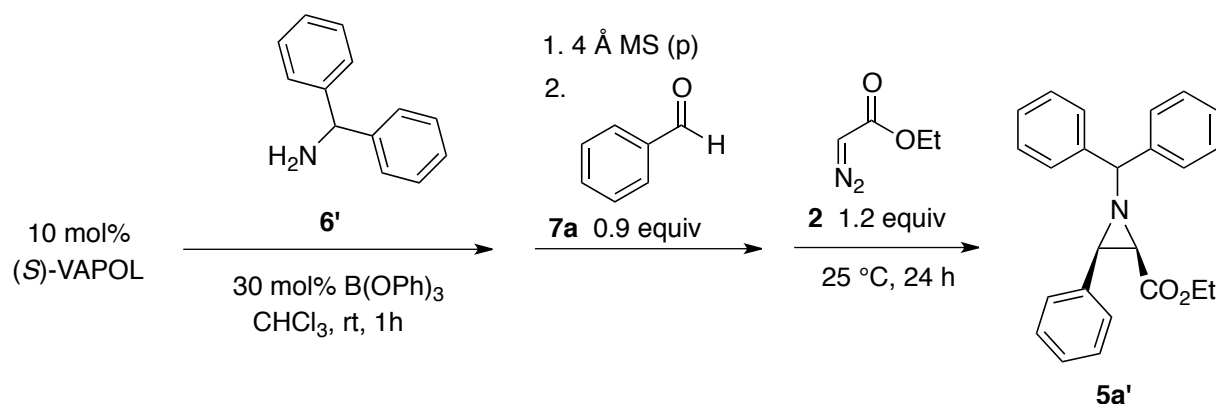

**(2*R*,3*R*)-ethyl 1-benzhydryl-3-phenylaziridine-2-carboxylate **5a'****: Aldehyde **7a** (46.0  $\mu\text{L}$ , 0.450 mmol, 0.900 equiv) was reacted according to the general Procedure IIIA described above with (*S*)-VAPOL as ligand. Purification of the crude aziridine by silica gel chromatography (30 mm  $\times$  300 mm column, 19:1 hexanes/EtOAc as eluent, gravity column) afforded pure cis-aziridine **5a'** as a white solid (mp. 127.5-128.5 °C) in 73 % isolated yield (117 mg, 0.323 mmol); *cis/trans*: 25:1. Enamine side products: 8 % yield of enamines. The optical purity of **5a'** was determined to be 89% *ee* by HPLC analysis (CHIRALCEL OD-H column, 90:10 hexane/2-propanol at 226 nm, flow-rate: 0.7 mL/min): retention times;  $R_t = 9.01$  min (major enantiomer, **5a'**) and  $R_t = 4.67$  min (minor enantiomer, *ent-5a'*). There was 8% of unreacted imine **1a'** was also observed. Same procedure was followed to do MCAZ for 0.6-1.0 equivalents of benzaldehyde **7a** and the results are presented in Table 5 of the manuscript.

Spectral data for **5a'**:  $R_f = 0.3$  (1:9 EtOAc/hexanes);  $^1\text{H}$  NMR ( $\text{CDCl}_3$ , 500 MHz)  $\delta$  0.95 (t, 3H,  $J = 7.3$  Hz), 2.64 (d, 1H,  $J = 6.8$  Hz), 3.19 (d, 1H,  $J = 6.8$  Hz), 3.91 (q, 2H,  $J = 7.1$  Hz), 3.93 (s, 1H), 7.16-7.38 (m, 11H), 7.47 (d, 2H,  $J = 7.1$  Hz), 7.58 (d, 2H,  $J = 7.6$  Hz);  $^{13}\text{C}$  NMR ( $\text{CDCl}_3$ ,

125 MHz)  $\delta$  13.93, 46.36, 48.01, 60.57, 77.68, 127.18, 127.31, 127.39, 127.52, 127.76, 127.78, 128.48, 135.00, 142.37, 142.49, 167.75 (one  $sp^2$  carbon not located);  $[\alpha]_D^{20} = +33.4$  ( $c$  1.0,  $\text{CH}_2\text{Cl}_2$ ) on 91% *ee* material (HPLC). These spectral data match those previously reported for this compound.<sup>4</sup>

**b) Aziridination with preformed imine **1a'** with added bases illustrated by utilizing amine **6'** as the base:** Imine **1a'** was prepared according to the published procedure.<sup>4</sup>

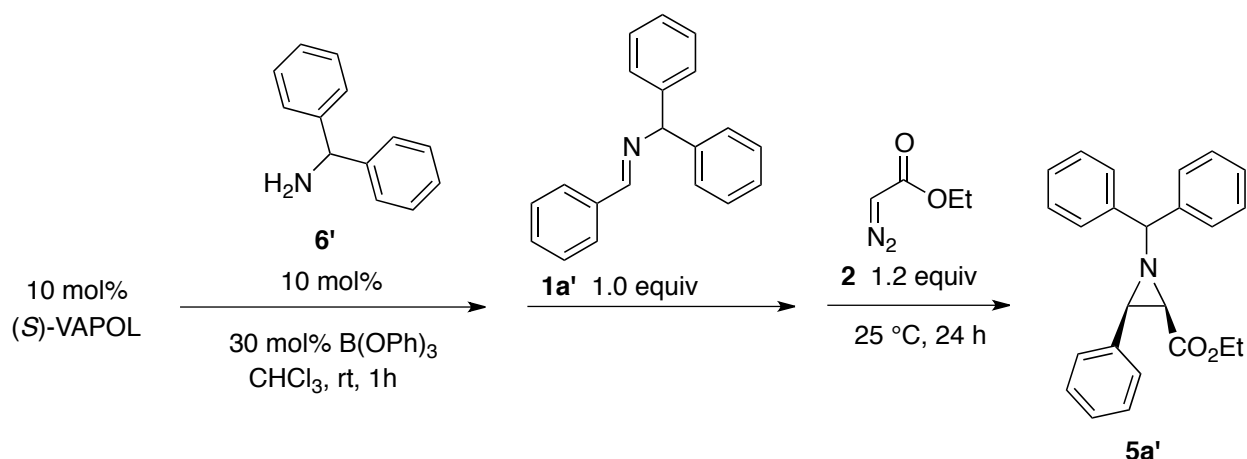

**(2R,3R)-ethyl 1-benzhydryl-3-phenylaziridine-2-carboxylate **5a'**:** To a 10 mL flame-dried single-necked round bottom flask equipped with a stir bar and filled with argon was added (S)-VAPOL (54 mg, 0.10 mmol),  $\text{B(OPh)}_3$  (87 mg, 0.30 mmol) and amine **6'** (17.2  $\mu\text{L}$ , 0.10 mmol). Dry toluene (2 mL) was added under an argon atmosphere to dissolve the reagents. The flask was fitted with a rubber septum and a nitrogen balloon. The reaction mixture was stirred at room temperature for 1 h. Thereafter, imine **1a'** (271 mg, 1.00 mmol) was added to the catalyst solution and stirred for 5 min. To this solution was rapidly added ethyl diazoacetate (EDA) **2** (124  $\mu\text{L}$ , 1.20 mmol, 1.2 equiv). The resulting mixture was stirred for 24 h at room temperature. The reaction was diluted by addition of hexane (6 mL). The resulting solution was then concentrated *in vacuo* followed by exposure to high vacuum (0.05 mm Hg) for 1 h to afford the crude aziridine as an off-white solid. Purification of the crude aziridine by silica gel chromatography (30 mm  $\times$  300 mm column, 19:1 hexanes/EtOAc as eluent, gravity column) afforded pure cis-aziridine **5a'** as a white solid (mp. 127.5-128.5 °C) in 80 % isolated yield (286 mg, 0.800 mmol); *cis/trans*: 27:1. Enamine side products: 10 % yield of enamines. The optical purity of **5a'** was determined to be 89% *ee* by HPLC analysis (CHIRALCEL OD-H column,



90:10 hexane/2-propanol at 226 nm, flow-rate: 0.7 mL/min): retention times;  $R_t = 9.01$  min (major enantiomer, **5a'**) and  $R_t = 4.67$  min (minor enantiomer, *ent*-**5a'**). Same procedure was followed to do MCAZ for other bases.

### G. DFT calculations of IMINO-BOROX **9a** and AMINO-BOROX **9d**:

All quantum mechanical calculations were performed using the GAUSSIAN 03.<sup>9</sup> The B3LYP<sup>10,11</sup> and BHandHLYP<sup>12-14</sup> density functional were used along with 3-21G\* and 6-31G\* basis sets. The calculated distances ( $d_1$ - $d_5$  and  $d_1'$ - $d_4'$ ) for both IMINO-BOROX **9a** and AMINO-BOROX **9d** are presented in Table 1.

**Table 1:** Calculated distances in Angstrom

#### A) IMINO-BOROX **9a**

| Methods          | $d_1$ (Å) | $d_2$ (Å) | $d_3$ (Å) | $d_4$ (Å) | $d_5$ (Å) |
|------------------|-----------|-----------|-----------|-----------|-----------|
| X-ray Crystals   | 2.02      | 4.42      | 3.49      | 5.52      | 4.78      |
| B3LYP/3-21g*     | 1.53      | 3.89      | 3.52      | 4.42      | 4.19      |
| B3LYP/6-31g*     | 1.73      | 3.92      | 5.56      | 4.66      | 4.02      |
| BHandHLYP/6-31g* | 1.73      | 3.84      | 3.52      | 4.55      | 3.88      |

#### B) AMINO-BOROX **9d**

| Methods          | $d_1'$ (Å) | $d_2'$ (Å) | $d_3'$ (Å) | $d_4'$ (Å) |
|------------------|------------|------------|------------|------------|
| X-ray Crystals   | -          | -          | -          | -          |
| B3LYP/3-21g*     | 1.60       | 1.86       | 3.15       | 4.05       |
| B3LYP/6-31g*     | 1.75       | 1.96       | 3.21       | 4.18       |
| BHandHLYP/6-31g* | 1.74       | 1.99       | 3.16       | 4.13       |

a) **NBO analysis on (S)-VAPOL-BOROX anion:** NBO analysis was performed at the B3LYP/6-31G\* level of theory as shown in Figure 4.

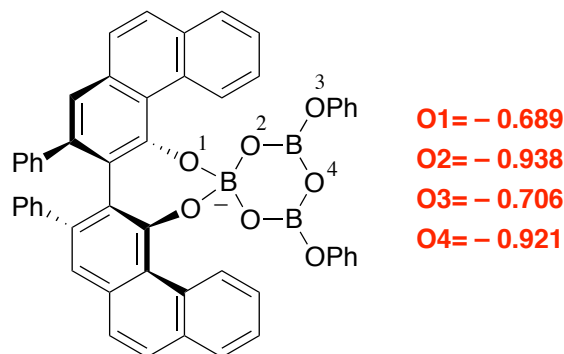

B3 9 BOROX anion

**Figure 4:** Natural charges on the oxygen atoms of the boroxinate anion

**b) Coordinates of IMINO-BOROX 9a:**

**B3LYP/3-21G\***

Energy = -3796.83103601 hartrees  
 Number of Imaginary frequencies = none

Zero-point correction= 1.249090 (Hartree/Particle)  
 Thermal correction to Energy= 1.326418  
 Thermal correction to Enthalpy= 1.327362  
 Thermal correction to Gibbs Free Energy= 1.125838  
 Sum of electronic and zero-point Energies= -3795.581946  
 Sum of electronic and thermal Energies= -3795.504618  
 Sum of electronic and thermal Enthalpies= -3795.503674  
 Sum of electronic and thermal Free Energies= -3795.705198

|       | E (Thermal) | CV             | S              |
|-------|-------------|----------------|----------------|
|       | KCal/Mol    | Cal/Mol-Kelvin | Cal/Mol-Kelvin |
| Total | 832.340     | 302.009        | 424.143        |

Standard orientation:

| -----  |        |        |                         |          |           |
|--------|--------|--------|-------------------------|----------|-----------|
| Center | Atomic | Atomic | Coordinates (Angstroms) |          |           |
| No.    | No.    | Type   | X                       | Y        | Z         |
| -----  |        |        |                         |          |           |
| 1      | 8      | 0      | -0.309357               | 1.003946 | -0.477093 |

|    |   |   |           |           |           |
|----|---|---|-----------|-----------|-----------|
| 2  | 6 | 0 | -1.440386 | 1.706267  | -0.913874 |
| 3  | 6 | 0 | -2.636115 | 1.421926  | -0.251971 |
| 4  | 6 | 0 | -2.667754 | 0.297649  | 0.731746  |
| 5  | 6 | 0 | -1.835606 | 0.365934  | 1.859922  |
| 6  | 8 | 0 | -0.858421 | 1.335012  | 1.900117  |
| 7  | 5 | 0 | 0.200342  | 1.436692  | 0.863026  |
| 8  | 8 | 0 | 1.344403  | 0.473067  | 1.169940  |
| 9  | 5 | 0 | 2.647966  | 0.894871  | 1.438071  |
| 10 | 8 | 0 | 2.977588  | 2.246052  | 1.435037  |
| 11 | 5 | 0 | 1.986605  | 3.223585  | 1.119119  |
| 12 | 8 | 0 | 0.705606  | 2.811167  | 0.856186  |
| 13 | 8 | 0 | 3.567952  | -0.118925 | 1.709242  |
| 14 | 6 | 0 | 4.924642  | -0.043202 | 2.058128  |
| 15 | 6 | 0 | 5.661116  | 1.144476  | 2.056397  |
| 16 | 1 | 0 | 5.174451  | 2.070898  | 1.791487  |
| 17 | 6 | 0 | 7.011663  | 1.107318  | 2.408218  |
| 18 | 1 | 0 | 7.582425  | 2.028799  | 2.406209  |
| 19 | 6 | 0 | 7.627515  | -0.095717 | 2.760106  |
| 20 | 1 | 0 | 8.676171  | -0.113930 | 3.031672  |
| 21 | 6 | 0 | 6.879296  | -1.276245 | 2.762178  |
| 22 | 1 | 0 | 7.344304  | -2.215509 | 3.038524  |
| 23 | 6 | 0 | 5.530094  | -1.252275 | 2.413035  |
| 24 | 1 | 0 | 4.926546  | -2.150328 | 2.419568  |
| 25 | 8 | 0 | 2.418951  | 4.536789  | 1.112818  |
| 26 | 6 | 0 | 1.729635  | 5.705011  | 0.761090  |
| 27 | 6 | 0 | 2.399736  | 6.905454  | 1.006378  |
| 28 | 1 | 0 | 3.384875  | 6.864224  | 1.451882  |
| 29 | 6 | 0 | 1.797065  | 8.116898  | 0.673089  |
| 30 | 1 | 0 | 2.320296  | 9.046575  | 0.865636  |
| 31 | 6 | 0 | 0.526217  | 8.132861  | 0.091173  |
| 32 | 1 | 0 | 0.058148  | 9.074461  | -0.170883 |
| 33 | 6 | 0 | -0.134277 | 6.926263  | -0.150706 |
| 34 | 1 | 0 | -1.117352 | 6.923991  | -0.607220 |
| 35 | 6 | 0 | 0.457696  | 5.707340  | 0.183773  |
| 36 | 1 | 0 | -0.050334 | 4.772073  | 0.005588  |
| 37 | 6 | 0 | -1.355550 | 2.685052  | -1.946315 |
| 38 | 6 | 0 | -0.151176 | 2.986620  | -2.724204 |
| 39 | 6 | 0 | 1.079548  | 2.294912  | -2.578151 |
| 40 | 1 | 0 | 1.131601  | 1.493104  | -1.863306 |
| 41 | 6 | 0 | 2.187580  | 2.619754  | -3.341986 |
| 42 | 1 | 0 | 3.106937  | 2.062661  | -3.206286 |
| 43 | 6 | 0 | 2.127736  | 3.655192  | -4.292587 |
| 44 | 1 | 0 | 3.003668  | 3.909197  | -4.878146 |
| 45 | 6 | 0 | 0.942957  | 4.340546  | -4.471708 |
| 46 | 1 | 0 | 0.872703  | 5.137954  | -5.204303 |
| 47 | 6 | 0 | -0.207132 | 4.024487  | -3.710869 |

|    |   |   |           |           |           |
|----|---|---|-----------|-----------|-----------|
| 48 | 6 | 0 | -1.431012 | 4.738571  | -3.939090 |
| 49 | 1 | 0 | -1.435002 | 5.521616  | -4.689942 |
| 50 | 6 | 0 | -2.554238 | 4.437975  | -3.241229 |
| 51 | 1 | 0 | -3.481180 | 4.972378  | -3.419161 |
| 52 | 6 | 0 | -2.555673 | 3.408008  | -2.239326 |
| 53 | 6 | 0 | -3.735526 | 3.158344  | -1.510469 |
| 54 | 1 | 0 | -4.605415 | 3.775166  | -1.705379 |
| 55 | 6 | 0 | -3.803121 | 2.185302  | -0.527663 |
| 56 | 6 | 0 | -5.062918 | 2.054340  | 0.259959  |
| 57 | 6 | 0 | -6.299488 | 1.943346  | -0.394761 |
| 58 | 1 | 0 | -6.318309 | 1.859044  | -1.474844 |
| 59 | 6 | 0 | -7.488688 | 1.906039  | 0.334724  |
| 60 | 1 | 0 | -8.436039 | 1.813896  | -0.184580 |
| 61 | 6 | 0 | -7.458525 | 1.977237  | 1.729333  |
| 62 | 1 | 0 | -8.381773 | 1.949503  | 2.297004  |
| 63 | 6 | 0 | -6.231390 | 2.085826  | 2.389712  |
| 64 | 1 | 0 | -6.200260 | 2.147385  | 3.471535  |
| 65 | 6 | 0 | -5.042124 | 2.125497  | 1.662245  |
| 66 | 1 | 0 | -4.093209 | 2.222840  | 2.173785  |
| 67 | 6 | 0 | -3.583459 | -0.780747 | 0.586513  |
| 68 | 6 | 0 | -4.396480 | -1.001567 | -0.646285 |
| 69 | 6 | 0 | -5.732971 | -1.424026 | -0.537284 |
| 70 | 1 | 0 | -6.190330 | -1.476801 | 0.443214  |
| 71 | 6 | 0 | -6.480922 | -1.729335 | -1.674147 |
| 72 | 1 | 0 | -7.513010 | -2.044542 | -1.570021 |
| 73 | 6 | 0 | -5.908907 | -1.612626 | -2.943665 |
| 74 | 1 | 0 | -6.490583 | -1.845609 | -3.828358 |
| 75 | 6 | 0 | -4.585447 | -1.179085 | -3.065636 |
| 76 | 1 | 0 | -4.135382 | -1.076275 | -4.046480 |
| 77 | 6 | 0 | -3.836213 | -0.874068 | -1.928661 |
| 78 | 1 | 0 | -2.814743 | -0.533167 | -2.030836 |
| 79 | 6 | 0 | -3.678272 | -1.713425 | 1.610793  |
| 80 | 1 | 0 | -4.338922 | -2.565500 | 1.496819  |
| 81 | 6 | 0 | -2.948355 | -1.583821 | 2.808331  |
| 82 | 6 | 0 | -3.137338 | -2.545797 | 3.859335  |
| 83 | 1 | 0 | -3.842089 | -3.352286 | 3.687441  |
| 84 | 6 | 0 | -2.468061 | -2.446152 | 5.034714  |
| 85 | 1 | 0 | -2.622163 | -3.172367 | 5.825841  |
| 86 | 6 | 0 | -1.557153 | -1.362762 | 5.274860  |
| 87 | 6 | 0 | -0.919994 | -1.243493 | 6.532635  |
| 88 | 1 | 0 | -1.127752 | -1.994202 | 7.288353  |
| 89 | 6 | 0 | -0.067522 | -0.191054 | 6.805643  |
| 90 | 1 | 0 | 0.404797  | -0.103801 | 7.777649  |
| 91 | 6 | 0 | 0.163275  | 0.781942  | 5.814579  |
| 92 | 1 | 0 | 0.810129  | 1.625516  | 6.028325  |
| 93 | 6 | 0 | -0.442830 | 0.688340  | 4.572755  |

|     |   |   |           |           |           |
|-----|---|---|-----------|-----------|-----------|
| 94  | 1 | 0 | -0.287319 | 1.448143  | 3.825493  |
| 95  | 6 | 0 | -1.312992 | -0.388944 | 4.251878  |
| 96  | 6 | 0 | -2.004181 | -0.523510 | 2.967295  |
| 97  | 6 | 0 | 0.789518  | -1.886731 | -1.182388 |
| 98  | 1 | 0 | 0.107585  | -1.029060 | -1.228602 |
| 99  | 7 | 0 | 1.113998  | -1.972081 | 0.292021  |
| 100 | 1 | 0 | 1.205849  | -0.994002 | 0.749676  |
| 101 | 6 | 0 | 1.284812  | -3.089915 | 0.917487  |
| 102 | 1 | 0 | 1.170326  | -3.996792 | 0.328167  |
| 103 | 6 | 0 | 1.611078  | -3.258460 | 2.318815  |
| 104 | 6 | 0 | 1.918038  | -4.562621 | 2.759250  |
| 105 | 1 | 0 | 1.896913  | -5.384871 | 2.051942  |
| 106 | 6 | 0 | 2.247213  | -4.790571 | 4.090613  |
| 107 | 1 | 0 | 2.488643  | -5.791520 | 4.426544  |
| 108 | 6 | 0 | 2.251631  | -3.723830 | 4.995967  |
| 109 | 1 | 0 | 2.493349  | -3.902730 | 6.037138  |
| 110 | 6 | 0 | 1.930987  | -2.430089 | 4.570578  |
| 111 | 1 | 0 | 1.894391  | -1.613161 | 5.278606  |
| 112 | 6 | 0 | 1.619553  | -2.189351 | 3.236709  |
| 113 | 1 | 0 | 1.358127  | -1.191862 | 2.914022  |
| 114 | 6 | 0 | 0.098142  | -3.162268 | -1.646635 |
| 115 | 6 | 0 | 0.790231  | -4.170847 | -2.326941 |
| 116 | 1 | 0 | 1.834306  | -4.024645 | -2.577169 |
| 117 | 6 | 0 | 0.142939  | -5.350172 | -2.708191 |
| 118 | 6 | 0 | 0.872827  | -6.457670 | -3.440339 |
| 119 | 1 | 0 | 1.950340  | -6.400991 | -3.260231 |
| 120 | 1 | 0 | 0.709519  | -6.384030 | -4.523640 |
| 121 | 1 | 0 | 0.496724  | -7.430045 | -3.112559 |
| 122 | 6 | 0 | -1.214370 | -5.510951 | -2.392776 |
| 123 | 8 | 0 | -1.858099 | -6.712497 | -2.749803 |
| 124 | 6 | 0 | -2.553196 | -6.656003 | -4.054942 |
| 125 | 1 | 0 | -2.992798 | -7.645147 | -4.189444 |
| 126 | 1 | 0 | -1.850283 | -6.445141 | -4.868221 |
| 127 | 1 | 0 | -3.339771 | -5.894411 | -4.049503 |
| 128 | 6 | 0 | -1.921841 | -4.522316 | -1.692046 |
| 129 | 6 | 0 | -3.379591 | -4.732108 | -1.338794 |
| 130 | 1 | 0 | -3.597059 | -4.318220 | -0.349907 |
| 131 | 1 | 0 | -3.609665 | -5.799835 | -1.347511 |
| 132 | 1 | 0 | -4.031746 | -4.218456 | -2.056199 |
| 133 | 6 | 0 | -1.250173 | -3.353928 | -1.321728 |
| 134 | 1 | 0 | -1.785887 | -2.591252 | -0.766541 |
| 135 | 6 | 0 | 2.051926  | -1.544656 | -1.978363 |
| 136 | 6 | 0 | 3.334291  | -1.550270 | -1.420623 |
| 137 | 1 | 0 | 3.474530  | -1.738149 | -0.364201 |
| 138 | 6 | 0 | 4.457378  | -1.246655 | -2.200752 |
| 139 | 6 | 0 | 5.848470  | -1.221271 | -1.600170 |

|     |   |   |          |           |           |
|-----|---|---|----------|-----------|-----------|
| 140 | 1 | 0 | 6.449510 | -0.457187 | -2.099468 |
| 141 | 1 | 0 | 6.353319 | -2.187717 | -1.734769 |
| 142 | 1 | 0 | 5.808218 | -1.010554 | -0.528477 |
| 143 | 6 | 0 | 4.278412 | -0.926456 | -3.553142 |
| 144 | 8 | 0 | 5.400562 | -0.585359 | -4.338168 |
| 145 | 6 | 0 | 6.058498 | -1.746167 | -4.974274 |
| 146 | 1 | 0 | 6.900449 | -1.331444 | -5.530294 |
| 147 | 1 | 0 | 5.374765 | -2.260297 | -5.659105 |
| 148 | 1 | 0 | 6.421612 | -2.456671 | -4.223982 |
| 149 | 6 | 0 | 2.996470 | -0.878538 | -4.123741 |
| 150 | 6 | 0 | 2.815365 | -0.440044 | -5.563217 |
| 151 | 1 | 0 | 2.076042 | 0.366248  | -5.617838 |
| 152 | 1 | 0 | 2.468411 | -1.269386 | -6.191872 |
| 153 | 1 | 0 | 3.766261 | -0.071004 | -5.951409 |
| 154 | 6 | 0 | 1.895040 | -1.188739 | -3.323405 |
| 155 | 1 | 0 | 0.900389 | -1.145438 | -3.754264 |

-----

**B3LYP/6-31G\***

Energy = -3817.70063424 hartrees

Number of Imaginary frequencies = none

Zero-point correction= 1.242009 (Hartree/Particle)  
 Thermal correction to Energy= 1.320573  
 Thermal correction to Enthalpy= 1.321517  
 Thermal correction to Gibbs Free Energy= 1.115078  
 Sum of electronic and zero-point Energies= -3816.458625  
 Sum of electronic and thermal Energies= -3816.380061  
 Sum of electronic and thermal Enthalpies= -3816.379117  
 Sum of electronic and thermal Free Energies= -3816.585556

|       | E (Thermal) | CV             | S              |
|-------|-------------|----------------|----------------|
|       | KCal/Mol    | Cal/Mol-Kelvin | Cal/Mol-Kelvin |
| Total | 828.672     | 306.363        | 434.487        |

Standard orientation:

-----

| Center | Atomic | Atomic | Coordinates (Angstroms) |          |           |
|--------|--------|--------|-------------------------|----------|-----------|
| No.    | No.    | Type   | X                       | Y        | Z         |
| 1      | 8      | 0      | -0.471533               | 0.966556 | -0.650731 |

-----

|    |   |   |           |           |           |
|----|---|---|-----------|-----------|-----------|
| 2  | 6 | 0 | -1.640664 | 1.341962  | -1.248481 |
| 3  | 6 | 0 | -2.825135 | 0.896240  | -0.645352 |
| 4  | 6 | 0 | -2.734807 | -0.059523 | 0.501976  |
| 5  | 6 | 0 | -2.028419 | 0.334274  | 1.656014  |
| 6  | 8 | 0 | -1.283477 | 1.455927  | 1.603722  |
| 7  | 5 | 0 | -0.182450 | 1.618179  | 0.642063  |
| 8  | 8 | 0 | 1.057067  | 0.922399  | 1.140121  |
| 9  | 5 | 0 | 2.220389  | 1.602242  | 1.349959  |
| 10 | 8 | 0 | 2.331575  | 2.952492  | 1.180209  |
| 11 | 5 | 0 | 1.204150  | 3.668240  | 0.761162  |
| 12 | 8 | 0 | 0.042493  | 3.045807  | 0.507141  |
| 13 | 8 | 0 | 3.286258  | 0.822324  | 1.770386  |
| 14 | 6 | 0 | 4.588519  | 1.211557  | 1.985927  |
| 15 | 6 | 0 | 5.227498  | 2.202507  | 1.233318  |
| 16 | 1 | 0 | 4.676839  | 2.747619  | 0.476977  |
| 17 | 6 | 0 | 6.569955  | 2.490437  | 1.484996  |
| 18 | 1 | 0 | 7.061151  | 3.265385  | 0.902323  |
| 19 | 6 | 0 | 7.280527  | 1.799951  | 2.468801  |
| 20 | 1 | 0 | 8.325043  | 2.032541  | 2.655930  |
| 21 | 6 | 0 | 6.634271  | 0.809793  | 3.211364  |
| 22 | 1 | 0 | 7.173087  | 0.265314  | 3.982699  |
| 23 | 6 | 0 | 5.292489  | 0.513724  | 2.972812  |
| 24 | 1 | 0 | 4.772907  | -0.249147 | 3.544939  |
| 25 | 8 | 0 | 1.418017  | 5.020623  | 0.662579  |
| 26 | 6 | 0 | 0.535461  | 6.005333  | 0.285253  |
| 27 | 6 | 0 | 0.818949  | 7.292351  | 0.754036  |
| 28 | 1 | 0 | 1.682647  | 7.432634  | 1.396959  |
| 29 | 6 | 0 | 0.000873  | 8.360938  | 0.392146  |
| 30 | 1 | 0 | 0.227543  | 9.357692  | 0.762425  |
| 31 | 6 | 0 | -1.100945 | 8.153769  | -0.440759 |
| 32 | 1 | 0 | -1.739505 | 8.986348  | -0.723440 |
| 33 | 6 | 0 | -1.372542 | 6.866761  | -0.907621 |
| 34 | 1 | 0 | -2.224908 | 6.691935  | -1.559173 |
| 35 | 6 | 0 | -0.561969 | 5.786664  | -0.553696 |
| 36 | 1 | 0 | -0.779503 | 4.789575  | -0.913146 |
| 37 | 6 | 0 | -1.634640 | 2.125769  | -2.443564 |
| 38 | 6 | 0 | -0.438239 | 2.564682  | -3.167531 |
| 39 | 6 | 0 | 0.890571  | 2.231799  | -2.797426 |
| 40 | 1 | 0 | 1.047274  | 1.601572  | -1.936859 |
| 41 | 6 | 0 | 1.983816  | 2.687429  | -3.516068 |
| 42 | 1 | 0 | 2.983345  | 2.410438  | -3.191599 |
| 43 | 6 | 0 | 1.813504  | 3.498561  | -4.650779 |
| 44 | 1 | 0 | 2.675810  | 3.859752  | -5.204981 |
| 45 | 6 | 0 | 0.534528  | 3.828785  | -5.050896 |
| 46 | 1 | 0 | 0.375793  | 4.449412  | -5.930119 |
| 47 | 6 | 0 | -0.598997 | 3.377249  | -4.336967 |

|    |   |   |           |           |           |
|----|---|---|-----------|-----------|-----------|
| 48 | 6 | 0 | -1.909008 | 3.735272  | -4.794482 |
| 49 | 1 | 0 | -1.994417 | 4.353899  | -5.684882 |
| 50 | 6 | 0 | -3.016093 | 3.311404  | -4.134645 |
| 51 | 1 | 0 | -4.009411 | 3.583395  | -4.483439 |
| 52 | 6 | 0 | -2.915289 | 2.502353  | -2.954585 |
| 53 | 6 | 0 | -4.094155 | 2.128847  | -2.282220 |
| 54 | 1 | 0 | -5.041159 | 2.507224  | -2.657227 |
| 55 | 6 | 0 | -4.083244 | 1.348953  | -1.137390 |
| 56 | 6 | 0 | -5.379650 | 1.098460  | -0.445717 |
| 57 | 6 | 0 | -6.508619 | 0.689554  | -1.174283 |
| 58 | 1 | 0 | -6.404816 | 0.472809  | -2.233746 |
| 59 | 6 | 0 | -7.746545 | 0.531866  | -0.551384 |
| 60 | 1 | 0 | -8.604928 | 0.207766  | -1.134674 |
| 61 | 6 | 0 | -7.881214 | 0.781591  | 0.815240  |
| 62 | 1 | 0 | -8.845419 | 0.660131  | 1.302332  |
| 63 | 6 | 0 | -6.767477 | 1.191490  | 1.551515  |
| 64 | 1 | 0 | -6.862186 | 1.398716  | 2.614375  |
| 65 | 6 | 0 | -5.530294 | 1.348792  | 0.928465  |
| 66 | 1 | 0 | -4.675783 | 1.687866  | 1.504955  |
| 67 | 6 | 0 | -3.403288 | -1.318042 | 0.481203  |
| 68 | 6 | 0 | -4.039602 | -1.899043 | -0.737462 |
| 69 | 6 | 0 | -5.262321 | -2.586076 | -0.634083 |
| 70 | 1 | 0 | -5.779961 | -2.602664 | 0.320206  |
| 71 | 6 | 0 | -5.836041 | -3.209729 | -1.741107 |
| 72 | 1 | 0 | -6.786901 | -3.725645 | -1.634097 |
| 73 | 6 | 0 | -5.202604 | -3.157395 | -2.984235 |
| 74 | 1 | 0 | -5.651840 | -3.636967 | -3.850161 |
| 75 | 6 | 0 | -3.991981 | -2.471963 | -3.106586 |
| 76 | 1 | 0 | -3.489501 | -2.418941 | -4.069120 |
| 77 | 6 | 0 | -3.418118 | -1.850518 | -1.997586 |
| 78 | 1 | 0 | -2.476688 | -1.323724 | -2.109580 |
| 79 | 6 | 0 | -3.422446 | -2.073933 | 1.646372  |
| 80 | 1 | 0 | -3.894470 | -3.052625 | 1.641747  |
| 81 | 6 | 0 | -2.860683 | -1.613634 | 2.851622  |
| 82 | 6 | 0 | -2.990371 | -2.413248 | 4.035832  |
| 83 | 1 | 0 | -3.510859 | -3.364762 | 3.955384  |
| 84 | 6 | 0 | -2.497446 | -1.992300 | 5.228026  |
| 85 | 1 | 0 | -2.612509 | -2.599931 | 6.122805  |
| 86 | 6 | 0 | -1.839139 | -0.724104 | 5.345059  |
| 87 | 6 | 0 | -1.391319 | -0.284406 | 6.611867  |
| 88 | 1 | 0 | -1.553115 | -0.933962 | 7.469691  |
| 89 | 6 | 0 | -0.779235 | 0.943915  | 6.770837  |
| 90 | 1 | 0 | -0.450082 | 1.273637  | 7.753026  |
| 91 | 6 | 0 | -0.604462 | 1.768946  | 5.646028  |
| 92 | 1 | 0 | -0.142388 | 2.746631  | 5.756960  |
| 93 | 6 | 0 | -1.029235 | 1.361614  | 4.391141  |



|     |   |   |           |           |           |
|-----|---|---|-----------|-----------|-----------|
| 94  | 1 | 0 | -0.905955 | 2.021384  | 3.546377  |
| 95  | 6 | 0 | -1.653039 | 0.101615  | 4.188060  |
| 96  | 6 | 0 | -2.154601 | -0.373370 | 2.895610  |
| 97  | 6 | 0 | 1.321110  | -1.999160 | -0.806672 |
| 98  | 1 | 0 | 0.504749  | -1.328280 | -1.096707 |
| 99  | 7 | 0 | 1.420029  | -1.780568 | 0.667480  |
| 100 | 1 | 0 | 1.297431  | -0.776931 | 0.947088  |
| 101 | 6 | 0 | 1.674146  | -2.706439 | 1.533265  |
| 102 | 1 | 0 | 1.789031  | -3.708821 | 1.125271  |
| 103 | 6 | 0 | 1.830883  | -2.558271 | 2.963013  |
| 104 | 6 | 0 | 2.234425  | -3.706705 | 3.675995  |
| 105 | 1 | 0 | 2.393833  | -4.640316 | 3.142299  |
| 106 | 6 | 0 | 2.435043  | -3.645324 | 5.049614  |
| 107 | 1 | 0 | 2.750914  | -4.530390 | 5.593482  |
| 108 | 6 | 0 | 2.219742  | -2.440369 | 5.724601  |
| 109 | 1 | 0 | 2.366794  | -2.390886 | 6.799993  |
| 110 | 6 | 0 | 1.803525  | -1.299665 | 5.029217  |
| 111 | 1 | 0 | 1.608449  | -0.374493 | 5.560562  |
| 112 | 6 | 0 | 1.610327  | -1.349302 | 3.653984  |
| 113 | 1 | 0 | 1.277371  | -0.464588 | 3.125044  |
| 114 | 6 | 0 | 0.926993  | -3.435121 | -1.137648 |
| 115 | 6 | 0 | 1.860355  | -4.381662 | -1.574509 |
| 116 | 1 | 0 | 2.897867  | -4.090856 | -1.710955 |
| 117 | 6 | 0 | 1.481388  | -5.697490 | -1.859183 |
| 118 | 6 | 0 | 2.491060  | -6.721828 | -2.318393 |
| 119 | 1 | 0 | 3.507092  | -6.319702 | -2.261026 |
| 120 | 1 | 0 | 2.314724  | -7.029749 | -3.356537 |
| 121 | 1 | 0 | 2.439188  | -7.629979 | -1.708866 |
| 122 | 6 | 0 | 0.132266  | -6.052628 | -1.696791 |
| 123 | 8 | 0 | -0.228150 | -7.366517 | -1.936435 |
| 124 | 6 | 0 | -0.801985 | -7.610978 | -3.221071 |
| 125 | 1 | 0 | -0.991763 | -8.685518 | -3.273418 |
| 126 | 1 | 0 | -0.114224 | -7.323654 | -4.027067 |
| 127 | 1 | 0 | -1.747189 | -7.070112 | -3.351620 |
| 128 | 6 | 0 | -0.826704 | -5.133555 | -1.235868 |
| 129 | 6 | 0 | -2.265702 | -5.539953 | -1.030216 |
| 130 | 1 | 0 | -2.731627 | -4.933969 | -0.248193 |
| 131 | 1 | 0 | -2.338082 | -6.595432 | -0.753091 |
| 132 | 1 | 0 | -2.861167 | -5.388376 | -1.939464 |
| 133 | 6 | 0 | -0.405395 | -3.827978 | -0.964547 |
| 134 | 1 | 0 | -1.135664 | -3.108767 | -0.601003 |
| 135 | 6 | 0 | 2.593180  | -1.517909 | -1.501924 |
| 136 | 6 | 0 | 3.840102  | -1.478435 | -0.871345 |
| 137 | 1 | 0 | 3.931860  | -1.713685 | 0.184330  |
| 138 | 6 | 0 | 4.995480  | -1.100056 | -1.565050 |
| 139 | 6 | 0 | 6.332999  | -1.019547 | -0.869924 |

|     |   |   |          |           |           |
|-----|---|---|----------|-----------|-----------|
| 140 | 1 | 0 | 6.798916 | -0.042124 | -1.028458 |
| 141 | 1 | 0 | 7.035588 | -1.772903 | -1.248371 |
| 142 | 1 | 0 | 6.222847 | -1.170697 | 0.207495  |
| 143 | 6 | 0 | 4.876442 | -0.770003 | -2.923951 |
| 144 | 8 | 0 | 6.011207 | -0.356691 | -3.601257 |
| 145 | 6 | 0 | 6.667063 | -1.378490 | -4.349059 |
| 146 | 1 | 0 | 7.551617 | -0.916539 | -4.793917 |
| 147 | 1 | 0 | 6.024695 | -1.771444 | -5.147765 |
| 148 | 1 | 0 | 6.978866 | -2.210594 | -3.703825 |
| 149 | 6 | 0 | 3.633169 | -0.770887 | -3.580433 |
| 150 | 6 | 0 | 3.513591 | -0.360413 | -5.028384 |
| 151 | 1 | 0 | 2.554003 | 0.131161  | -5.212665 |
| 152 | 1 | 0 | 3.577339 | -1.227044 | -5.700318 |
| 153 | 1 | 0 | 4.314365 | 0.330692  | -5.303906 |
| 154 | 6 | 0 | 2.503643 | -1.143565 | -2.846479 |
| 155 | 1 | 0 | 1.533346 | -1.137141 | -3.337553 |

**BHandHLYP/6-31G\***

Energy = -3815.48426974 hartrees

Number of Imaginary frequencies = none

Zero-point correction= 1.289748 (Hartree/Particle)  
 Thermal correction to Energy= 1.365579  
 Thermal correction to Enthalpy= 1.366523  
 Thermal correction to Gibbs Free Energy= 1.167169  
 Sum of electronic and zero-point Energies= -3814.194522  
 Sum of electronic and thermal Energies= -3814.118690  
 Sum of electronic and thermal Enthalpies= -3814.117746  
 Sum of electronic and thermal Free Energies= -3814.317101

|       | E (Thermal) | CV             | S              |
|-------|-------------|----------------|----------------|
|       | KCal/Mol    | Cal/Mol-Kelvin | Cal/Mol-Kelvin |
| Total | 856.914     | 294.506        | 419.577        |

Standard orientation:

| -----  |        |        |                         |          |           |
|--------|--------|--------|-------------------------|----------|-----------|
| Center | Atomic | Atomic | Coordinates (Angstroms) |          |           |
| No.    | No.    | Type   | X                       | Y        | Z         |
| -----  |        |        |                         |          |           |
| 1      | 8      | 0      | -0.426816               | 0.996368 | -0.603016 |
| 2      | 6      | 0      | -1.575398               | 1.426778 | -1.170917 |
| 3      | 6      | 0      | -2.759192               | 1.018511 | -0.571327 |
| 4      | 6      | 0      | -2.688145               | 0.051512 | 0.559472  |

|    |   |   |           |           |           |
|----|---|---|-----------|-----------|-----------|
| 5  | 6 | 0 | -1.949865 | 0.406335  | 1.688948  |
| 6  | 8 | 0 | -1.188863 | 1.502464  | 1.631713  |
| 7  | 5 | 0 | -0.088760 | 1.614634  | 0.682185  |
| 8  | 8 | 0 | 1.099626  | 0.852299  | 1.160975  |
| 9  | 5 | 0 | 2.297623  | 1.446734  | 1.347587  |
| 10 | 8 | 0 | 2.485910  | 2.778885  | 1.191457  |
| 11 | 5 | 0 | 1.406686  | 3.559841  | 0.806532  |
| 12 | 8 | 0 | 0.218664  | 3.014475  | 0.559300  |
| 13 | 8 | 0 | 3.316710  | 0.604476  | 1.721194  |
| 14 | 6 | 0 | 4.633429  | 0.901198  | 1.908772  |
| 15 | 6 | 0 | 5.306129  | 1.868707  | 1.175305  |
| 16 | 1 | 0 | 4.773781  | 2.467842  | 0.459924  |
| 17 | 6 | 0 | 6.660801  | 2.063675  | 1.393598  |
| 18 | 1 | 0 | 7.178372  | 2.820523  | 0.826387  |
| 19 | 6 | 0 | 7.350032  | 1.303120  | 2.325011  |
| 20 | 1 | 0 | 8.403442  | 1.463338  | 2.486178  |
| 21 | 6 | 0 | 6.669158  | 0.337264  | 3.049442  |
| 22 | 1 | 0 | 7.190450  | -0.260370 | 3.780141  |
| 23 | 6 | 0 | 5.314866  | 0.134591  | 2.843801  |
| 24 | 1 | 0 | 4.768805  | -0.607762 | 3.402128  |
| 25 | 8 | 0 | 1.678957  | 4.891530  | 0.727195  |
| 26 | 6 | 0 | 0.803102  | 5.873946  | 0.371375  |
| 27 | 6 | 0 | 0.837186  | 7.048808  | 1.106774  |
| 28 | 1 | 0 | 1.516926  | 7.119648  | 1.939541  |
| 29 | 6 | 0 | 0.007626  | 8.102027  | 0.760808  |
| 30 | 1 | 0 | 0.037180  | 9.012869  | 1.337498  |
| 31 | 6 | 0 | -0.854839 | 7.988212  | -0.318443 |
| 32 | 1 | 0 | -1.501781 | 8.807729  | -0.586522 |
| 33 | 6 | 0 | -0.876461 | 6.811307  | -1.050580 |
| 34 | 1 | 0 | -1.540907 | 6.708454  | -1.893561 |
| 35 | 6 | 0 | -0.049343 | 5.752002  | -0.715331 |
| 36 | 1 | 0 | -0.068010 | 4.839422  | -1.282426 |
| 37 | 6 | 0 | -1.552720 | 2.239399  | -2.333461 |
| 38 | 6 | 0 | -0.350406 | 2.649725  | -3.051876 |
| 39 | 6 | 0 | 0.957631  | 2.244489  | -2.713150 |
| 40 | 1 | 0 | 1.095642  | 1.577230  | -1.889116 |
| 41 | 6 | 0 | 2.053853  | 2.679453  | -3.418283 |
| 42 | 1 | 0 | 3.035370  | 2.345784  | -3.122198 |
| 43 | 6 | 0 | 1.908952  | 3.540386  | -4.508246 |
| 44 | 1 | 0 | 2.774063  | 3.884399  | -5.051763 |
| 45 | 6 | 0 | 0.651868  | 3.938488  | -4.876313 |
| 46 | 1 | 0 | 0.512909  | 4.597090  | -5.719684 |
| 47 | 6 | 0 | -0.484902 | 3.507462  | -4.172836 |
| 48 | 6 | 0 | -1.778130 | 3.939157  | -4.600169 |
| 49 | 1 | 0 | -1.843305 | 4.591119  | -5.457190 |
| 50 | 6 | 0 | -2.885430 | 3.538418  | -3.953672 |

|    |   |   |           |           |           |
|----|---|---|-----------|-----------|-----------|
| 51 | 1 | 0 | -3.861864 | 3.862285  | -4.277569 |
| 52 | 6 | 0 | -2.807132 | 2.682336  | -2.811295 |
| 53 | 6 | 0 | -3.987465 | 2.334868  | -2.146458 |
| 54 | 1 | 0 | -4.915588 | 2.754943  | -2.498507 |
| 55 | 6 | 0 | -3.993948 | 1.526448  | -1.036286 |
| 56 | 6 | 0 | -5.288196 | 1.296105  | -0.347050 |
| 57 | 6 | 0 | -6.417861 | 0.928466  | -1.074486 |
| 58 | 1 | 0 | -6.322544 | 0.733163  | -2.130195 |
| 59 | 6 | 0 | -7.647599 | 0.782862  | -0.454361 |
| 60 | 1 | 0 | -8.507762 | 0.490696  | -1.035622 |
| 61 | 6 | 0 | -7.770301 | 1.003993  | 0.907895  |
| 62 | 1 | 0 | -8.726933 | 0.892058  | 1.392866  |
| 63 | 6 | 0 | -6.654017 | 1.373558  | 1.642743  |
| 64 | 1 | 0 | -6.739869 | 1.557666  | 2.701692  |
| 65 | 6 | 0 | -5.425313 | 1.519046  | 1.021804  |
| 66 | 1 | 0 | -4.567655 | 1.823768  | 1.597129  |
| 67 | 6 | 0 | -3.392312 | -1.174645 | 0.540774  |
| 68 | 6 | 0 | -4.085234 | -1.709852 | -0.660083 |
| 69 | 6 | 0 | -5.326596 | -2.331920 | -0.527738 |
| 70 | 1 | 0 | -5.812566 | -2.334815 | 0.433633  |
| 71 | 6 | 0 | -5.958892 | -2.906745 | -1.616720 |
| 72 | 1 | 0 | -6.923101 | -3.372289 | -1.488998 |
| 73 | 6 | 0 | -5.364330 | -2.868613 | -2.868191 |
| 74 | 1 | 0 | -5.858133 | -3.309531 | -3.719397 |
| 75 | 6 | 0 | -4.133771 | -2.247428 | -3.017552 |
| 76 | 1 | 0 | -3.661876 | -2.206432 | -3.986277 |
| 77 | 6 | 0 | -3.502034 | -1.674523 | -1.926161 |
| 78 | 1 | 0 | -2.547877 | -1.194615 | -2.058727 |
| 79 | 6 | 0 | -3.402134 | -1.942405 | 1.684012  |
| 80 | 1 | 0 | -3.908191 | -2.894177 | 1.681405  |
| 81 | 6 | 0 | -2.787882 | -1.523509 | 2.868018  |
| 82 | 6 | 0 | -2.904789 | -2.337348 | 4.038162  |
| 83 | 1 | 0 | -3.453298 | -3.262859 | 3.959455  |
| 84 | 6 | 0 | -2.365524 | -1.955528 | 5.207708  |
| 85 | 1 | 0 | -2.469316 | -2.568073 | 6.089743  |
| 86 | 6 | 0 | -1.663013 | -0.716168 | 5.320889  |
| 87 | 6 | 0 | -1.162875 | -0.319503 | 6.571840  |
| 88 | 1 | 0 | -1.320108 | -0.971996 | 7.417049  |
| 89 | 6 | 0 | -0.503618 | 0.871460  | 6.728592  |
| 90 | 1 | 0 | -0.133400 | 1.169992  | 7.696399  |
| 91 | 6 | 0 | -0.331804 | 1.701326  | 5.617876  |
| 92 | 1 | 0 | 0.169807  | 2.649516  | 5.727482  |
| 93 | 6 | 0 | -0.810117 | 1.335710  | 4.381875  |
| 94 | 1 | 0 | -0.688507 | 1.999666  | 3.551454  |
| 95 | 6 | 0 | -1.486888 | 0.112685  | 4.183816  |
| 96 | 6 | 0 | -2.049398 | -0.319674 | 2.907633  |

|     |   |   |           |           |           |
|-----|---|---|-----------|-----------|-----------|
| 97  | 6 | 0 | 1.168302  | -1.996489 | -0.846020 |
| 98  | 1 | 0 | 0.378941  | -1.290109 | -1.086221 |
| 99  | 7 | 0 | 1.322632  | -1.840355 | 0.617806  |
| 100 | 1 | 0 | 1.249609  | -0.858256 | 0.934366  |
| 101 | 6 | 0 | 1.564830  | -2.793408 | 1.434097  |
| 102 | 1 | 0 | 1.628080  | -3.778776 | 0.998238  |
| 103 | 6 | 0 | 1.773389  | -2.693280 | 2.857244  |
| 104 | 6 | 0 | 2.152237  | -3.864806 | 3.519937  |
| 105 | 1 | 0 | 2.255856  | -4.783032 | 2.963596  |
| 106 | 6 | 0 | 2.399197  | -3.846749 | 4.877715  |
| 107 | 1 | 0 | 2.695710  | -4.749127 | 5.385495  |
| 108 | 6 | 0 | 2.255578  | -2.659751 | 5.581980  |
| 109 | 1 | 0 | 2.440160  | -2.642927 | 6.643823  |
| 110 | 6 | 0 | 1.865105  | -1.494478 | 4.934638  |
| 111 | 1 | 0 | 1.728360  | -0.582890 | 5.489643  |
| 112 | 6 | 0 | 1.624785  | -1.503388 | 3.575557  |
| 113 | 1 | 0 | 1.314626  | -0.599706 | 3.083347  |
| 114 | 6 | 0 | 0.706399  | -3.394616 | -1.207968 |
| 115 | 6 | 0 | 1.570811  | -4.351344 | -1.723028 |
| 116 | 1 | 0 | 2.603070  | -4.098944 | -1.901221 |
| 117 | 6 | 0 | 1.125675  | -5.629954 | -2.031483 |
| 118 | 6 | 0 | 2.060328  | -6.671438 | -2.576393 |
| 119 | 1 | 0 | 3.086675  | -6.318104 | -2.552480 |
| 120 | 1 | 0 | 1.822564  | -6.924285 | -3.607863 |
| 121 | 1 | 0 | 1.996398  | -7.592321 | -2.003837 |
| 122 | 6 | 0 | -0.215758 | -5.935609 | -1.813858 |
| 123 | 8 | 0 | -0.641906 | -7.207324 | -2.088360 |
| 124 | 6 | 0 | -1.267563 | -7.371969 | -3.343312 |
| 125 | 1 | 0 | -1.513287 | -8.423580 | -3.431985 |
| 126 | 1 | 0 | -0.601392 | -7.088135 | -4.156046 |
| 127 | 1 | 0 | -2.179344 | -6.783354 | -3.413492 |
| 128 | 6 | 0 | -1.104162 | -5.005417 | -1.276060 |
| 129 | 6 | 0 | -2.540519 | -5.357960 | -1.016948 |
| 130 | 1 | 0 | -2.930715 | -4.782791 | -0.183551 |
| 131 | 1 | 0 | -2.646772 | -6.414900 | -0.795918 |
| 132 | 1 | 0 | -3.167376 | -5.126897 | -1.876441 |
| 133 | 6 | 0 | -0.620136 | -3.738537 | -0.981178 |
| 134 | 1 | 0 | -1.295149 | -3.011000 | -0.557901 |
| 135 | 6 | 0 | 2.428167  | -1.547399 | -1.562715 |
| 136 | 6 | 0 | 3.682653  | -1.552855 | -0.970491 |
| 137 | 1 | 0 | 3.797521  | -1.809164 | 0.069122  |
| 138 | 6 | 0 | 4.819221  | -1.192690 | -1.684696 |
| 139 | 6 | 0 | 6.171786  | -1.164503 | -1.033001 |
| 140 | 1 | 0 | 6.654624  | -0.203958 | -1.183746 |
| 141 | 1 | 0 | 6.833164  | -1.923537 | -1.447290 |
| 142 | 1 | 0 | 6.090337  | -1.334906 | 0.035502  |

|     |   |   |          |           |           |
|-----|---|---|----------|-----------|-----------|
| 143 | 6 | 0 | 4.673087 | -0.832391 | -3.020957 |
| 144 | 8 | 0 | 5.787587 | -0.443636 | -3.717139 |
| 145 | 6 | 0 | 6.392425 | -1.457186 | -4.487920 |
| 146 | 1 | 0 | 7.270862 | -1.018353 | -4.946449 |
| 147 | 1 | 0 | 5.723964 | -1.817240 | -5.267742 |
| 148 | 1 | 0 | 6.694399 | -2.299309 | -3.867375 |
| 149 | 6 | 0 | 3.423400 | -0.790975 | -3.637903 |
| 150 | 6 | 0 | 3.276923 | -0.350801 | -5.066159 |
| 151 | 1 | 0 | 2.326502 | 0.151368  | -5.215459 |
| 152 | 1 | 0 | 3.315416 | -1.198270 | -5.749964 |
| 153 | 1 | 0 | 4.072294 | 0.332602  | -5.342991 |
| 154 | 6 | 0 | 2.313323 | -1.149182 | -2.887465 |
| 155 | 1 | 0 | 1.338166 | -1.109020 | -3.347681 |

---

**c) Coordinates of AMINO-BOROX 9d:**

**B3LYP/3-21G\***

Energy = -3529.17572942 hartrees  
 Number of Imaginary frequencies = none

|                                              |                             |
|----------------------------------------------|-----------------------------|
| Zero-point correction=                       | 1.163496 (Hartree/Particle) |
| Thermal correction to Energy=                | 1.235231                    |
| Thermal correction to Enthalpy=              | 1.236175                    |
| Thermal correction to Gibbs Free Energy=     | 1.046771                    |
| Sum of electronic and zero-point Energies=   | -3528.012234                |
| Sum of electronic and thermal Energies=      | -3527.940499                |
| Sum of electronic and thermal Enthalpies=    | -3527.939554                |
| Sum of electronic and thermal Free Energies= | -3528.128958                |

|       | E (Thermal) | CV             | S              |
|-------|-------------|----------------|----------------|
|       | KCal/Mol    | Cal/Mol-Kelvin | Cal/Mol-Kelvin |
| Total | 775.119     | 280.763        | 398.634        |

Standard orientation:

---

| Center Atomic Atomic |     |      | Coordinates (Angstroms) |           |           |
|----------------------|-----|------|-------------------------|-----------|-----------|
| No.                  | No. | Type | X                       | Y         | Z         |
| 1                    | 8   | 0    | -1.270858               | -0.275466 | 0.413774  |
| 2                    | 6   | 0    | -2.606721               | 0.172147  | 0.410310  |
| 3                    | 6   | 0    | -2.822061               | 1.446874  | -0.118308 |
| 4                    | 6   | 0    | -1.623326               | 2.275141  | -0.451275 |
| 5                    | 6   | 0    | -0.746386               | 1.785901  | -1.429146 |
| 6                    | 8   | 0    | -0.980249               | 0.508842  | -1.902561 |
| 7                    | 5   | 0    | -0.726922               | -0.623134 | -0.957108 |
| 8                    | 8   | 0    | 0.769295                | -0.784038 | -0.747067 |
| 9                    | 5   | 0    | 1.489959                | -1.807247 | -1.348231 |
| 10                   | 8   | 0    | 0.837664                | -2.787609 | -2.098503 |
| 11                   | 5   | 0    | -0.584866               | -2.837771 | -2.133237 |
| 12                   | 8   | 0    | -1.301426               | -1.837054 | -1.516638 |
| 13                   | 8   | 0    | 2.870651                | -1.827749 | -1.124481 |
| 14                   | 6   | 0    | 3.864683                | -2.651153 | -1.682583 |
| 15                   | 6   | 0    | 3.635691                | -3.521437 | -2.750906 |
| 16                   | 1   | 0    | 2.641343                | -3.611775 | -3.160659 |
| 17                   | 6   | 0    | 4.696783                | -4.279293 | -3.249683 |
| 18                   | 1   | 0    | 4.518570                | -4.954508 | -4.078698 |
| 19                   | 6   | 0    | 5.972878                | -4.180022 | -2.690929 |
| 20                   | 1   | 0    | 6.789839                | -4.772089 | -3.085516 |
| 21                   | 6   | 0    | 6.186166                | -3.315790 | -1.613955 |
| 22                   | 1   | 0    | 7.169412                | -3.234656 | -1.165463 |
| 23                   | 6   | 0    | 5.134568                | -2.553672 | -1.106950 |
| 24                   | 1   | 0    | 5.277393                | -1.884393 | -0.268623 |
| 25                   | 8   | 0    | -1.142339               | -3.918391 | -2.790546 |
| 26                   | 6   | 0    | -2.488419               | -4.282623 | -2.937252 |
| 27                   | 6   | 0    | -2.737010               | -5.366823 | -3.781527 |
| 28                   | 1   | 0    | -1.897164               | -5.844916 | -4.268069 |

|    |   |   |           |           |           |
|----|---|---|-----------|-----------|-----------|
| 29 | 6 | 0 | -4.044340 | -5.808558 | -3.975664 |
| 30 | 1 | 0 | -4.233704 | -6.650096 | -4.632189 |
| 31 | 6 | 0 | -5.105381 | -5.171364 | -3.325811 |
| 32 | 1 | 0 | -6.121858 | -5.516128 | -3.474933 |
| 33 | 6 | 0 | -4.844950 | -4.088816 | -2.482729 |
| 34 | 1 | 0 | -5.657608 | -3.588490 | -1.968684 |
| 35 | 6 | 0 | -3.539871 | -3.635429 | -2.283926 |
| 36 | 1 | 0 | -3.332320 | -2.795765 | -1.638577 |
| 37 | 6 | 0 | -3.669367 | -0.648877 | 0.879859  |
| 38 | 6 | 0 | -3.508410 | -1.947240 | 1.543414  |
| 39 | 6 | 0 | -2.253478 | -2.504427 | 1.907903  |
| 40 | 1 | 0 | -1.360098 | -1.950501 | 1.674860  |
| 41 | 6 | 0 | -2.165659 | -3.723222 | 2.563024  |
| 42 | 1 | 0 | -1.199421 | -4.116234 | 2.857360  |
| 43 | 6 | 0 | -3.328070 | -4.453527 | 2.873637  |
| 44 | 1 | 0 | -3.248565 | -5.411550 | 3.374486  |
| 45 | 6 | 0 | -4.564842 | -3.938544 | 2.544234  |
| 46 | 1 | 0 | -5.472316 | -4.481299 | 2.787975  |
| 47 | 6 | 0 | -4.683969 | -2.686509 | 1.897300  |
| 48 | 6 | 0 | -5.987276 | -2.147873 | 1.628391  |
| 49 | 1 | 0 | -6.852900 | -2.742017 | 1.901768  |
| 50 | 6 | 0 | -6.134391 | -0.919536 | 1.073701  |
| 51 | 1 | 0 | -7.119325 | -0.503287 | 0.892406  |
| 52 | 6 | 0 | -4.993256 | -0.130911 | 0.699277  |
| 53 | 6 | 0 | -5.195742 | 1.129633  | 0.101859  |
| 54 | 1 | 0 | -6.212241 | 1.462369  | -0.074871 |
| 55 | 6 | 0 | -4.141469 | 1.932566  | -0.299879 |
| 56 | 6 | 0 | -4.430672 | 3.215946  | -1.000685 |
| 57 | 6 | 0 | -5.297090 | 4.161041  | -0.430915 |
| 58 | 1 | 0 | -5.687646 | 3.987013  | 0.564722  |
| 59 | 6 | 0 | -5.626791 | 5.327453  | -1.123373 |



|    |   |   |           |          |           |
|----|---|---|-----------|----------|-----------|
| 60 | 1 | 0 | -6.292753 | 6.052824 | -0.669715 |
| 61 | 6 | 0 | -5.094580 | 5.563818 | -2.392902 |
| 62 | 1 | 0 | -5.351972 | 6.468656 | -2.931722 |
| 63 | 6 | 0 | -4.229897 | 4.627476 | -2.966952 |
| 64 | 1 | 0 | -3.819414 | 4.801430 | -3.955039 |
| 65 | 6 | 0 | -3.899954 | 3.460894 | -2.277443 |
| 66 | 1 | 0 | -3.243400 | 2.726319 | -2.726758 |
| 67 | 6 | 0 | -1.343957 | 3.499494 | 0.212497  |
| 68 | 6 | 0 | -2.168210 | 4.025999 | 1.340469  |
| 69 | 6 | 0 | -2.512187 | 5.387587 | 1.376168  |
| 70 | 1 | 0 | -2.252514 | 6.019328 | 0.535247  |
| 71 | 6 | 0 | -3.214161 | 5.916497 | 2.459500  |
| 72 | 1 | 0 | -3.479730 | 6.967467 | 2.466626  |
| 73 | 6 | 0 | -3.586860 | 5.092895 | 3.524304  |
| 74 | 1 | 0 | -4.134204 | 5.502662 | 4.365385  |
| 75 | 6 | 0 | -3.256823 | 3.735384 | 3.495232  |
| 76 | 1 | 0 | -3.547159 | 3.087975 | 4.314770  |
| 77 | 6 | 0 | -2.553995 | 3.205326 | 2.413086  |
| 78 | 1 | 0 | -2.312806 | 2.150557 | 2.392186  |
| 79 | 6 | 0 | -0.196984 | 4.198697 | -0.146638 |
| 80 | 1 | 0 | 0.057239  | 5.109391 | 0.383864  |
| 81 | 6 | 0 | 0.657343  | 3.760293 | -1.181303 |
| 82 | 6 | 0 | 1.828537  | 4.527406 | -1.511184 |
| 83 | 1 | 0 | 2.001056  | 5.450160 | -0.967951 |
| 84 | 6 | 0 | 2.691192  | 4.112617 | -2.472469 |
| 85 | 1 | 0 | 3.572390  | 4.697036 | -2.715878 |
| 86 | 6 | 0 | 2.453189  | 2.904463 | -3.212509 |
| 87 | 6 | 0 | 3.347739  | 2.513673 | -4.237670 |
| 88 | 1 | 0 | 4.216520  | 3.134941 | -4.430537 |
| 89 | 6 | 0 | 3.115211  | 1.380037 | -4.991371 |
| 90 | 1 | 0 | 3.806648  | 1.090086 | -5.773727 |

|     |   |   |          |           |           |
|-----|---|---|----------|-----------|-----------|
| 91  | 6 | 0 | 1.962042 | 0.612231  | -4.746034 |
| 92  | 1 | 0 | 1.760452 | -0.263696 | -5.351841 |
| 93  | 6 | 0 | 1.073861 | 0.965241  | -3.744940 |
| 94  | 1 | 0 | 0.180354 | 0.388345  | -3.572857 |
| 95  | 6 | 0 | 1.296688 | 2.108157  | -2.931489 |
| 96  | 6 | 0 | 0.393702 | 2.528799  | -1.859964 |
| 97  | 6 | 0 | 1.964793 | 0.876280  | 2.308508  |
| 98  | 1 | 0 | 1.596128 | 1.581678  | 3.059265  |
| 99  | 7 | 0 | 1.027627 | 1.015349  | 1.104862  |
| 100 | 1 | 0 | 0.043060 | 0.704266  | 1.298506  |
| 101 | 6 | 0 | 3.377836 | 1.278354  | 1.909307  |
| 102 | 6 | 0 | 4.177916 | 1.914804  | 2.865972  |
| 103 | 1 | 0 | 3.787075 | 2.090925  | 3.863482  |
| 104 | 6 | 0 | 5.475760 | 2.327224  | 2.562544  |
| 105 | 6 | 0 | 6.358236 | 3.000922  | 3.593456  |
| 106 | 1 | 0 | 6.074659 | 2.700258  | 4.606285  |
| 107 | 1 | 0 | 6.274242 | 4.093991  | 3.529993  |
| 108 | 1 | 0 | 7.402255 | 2.734110  | 3.412644  |
| 109 | 6 | 0 | 5.969728 | 2.103585  | 1.267787  |
| 110 | 8 | 0 | 7.284511 | 2.508888  | 0.958396  |
| 111 | 6 | 0 | 7.373888 | 3.883003  | 0.418098  |
| 112 | 1 | 0 | 8.436012 | 4.052538  | 0.236534  |
| 113 | 1 | 0 | 6.996177 | 4.617374  | 1.137884  |
| 114 | 1 | 0 | 6.814385 | 3.974026  | -0.518998 |
| 115 | 6 | 0 | 5.195260 | 1.453397  | 0.298570  |
| 116 | 6 | 0 | 5.753640 | 1.208362  | -1.088990 |
| 117 | 1 | 0 | 5.518456 | 0.195537  | -1.429734 |
| 118 | 1 | 0 | 6.837271 | 1.340973  | -1.075568 |
| 119 | 1 | 0 | 5.312767 | 1.906701  | -1.811268 |
| 120 | 6 | 0 | 3.900411 | 1.035805  | 0.634587  |
| 121 | 1 | 0 | 3.329606 | 0.505002  | -0.118738 |

|     |   |   |           |           |          |
|-----|---|---|-----------|-----------|----------|
| 122 | 6 | 0 | 1.800926  | -0.539036 | 2.843663 |
| 123 | 6 | 0 | 2.316691  | -1.635879 | 2.148443 |
| 124 | 1 | 0 | 2.911582  | -1.490378 | 1.256031 |
| 125 | 6 | 0 | 2.019680  | -2.940466 | 2.553012 |
| 126 | 6 | 0 | 2.511090  | -4.134488 | 1.761118 |
| 127 | 1 | 0 | 1.757670  | -4.926392 | 1.779015 |
| 128 | 1 | 0 | 3.439879  | -4.536367 | 2.186731 |
| 129 | 1 | 0 | 2.716011  | -3.848690 | 0.726935 |
| 130 | 6 | 0 | 1.199083  | -3.127468 | 3.673371 |
| 131 | 8 | 0 | 0.778928  | -4.426329 | 4.024430 |
| 132 | 6 | 0 | 1.716142  | -5.179025 | 4.886206 |
| 133 | 1 | 0 | 1.241416  | -6.147152 | 5.049357 |
| 134 | 1 | 0 | 1.864217  | -4.668270 | 5.843669 |
| 135 | 1 | 0 | 2.683785  | -5.316346 | 4.393879 |
| 136 | 6 | 0 | 0.689353  | -2.043676 | 4.399593 |
| 137 | 6 | 0 | -0.249331 | -2.297478 | 5.559467 |
| 138 | 1 | 0 | -0.514247 | -1.359228 | 6.054965 |
| 139 | 1 | 0 | 0.201302  | -2.965214 | 6.301036 |
| 140 | 1 | 0 | -1.166330 | -2.771649 | 5.193299 |
| 141 | 6 | 0 | 0.998026  | -0.750688 | 3.969855 |
| 142 | 1 | 0 | 0.582210  | 0.096747  | 4.506649 |
| 143 | 1 | 0 | 1.022149  | 1.977474  | 0.727411 |
| 144 | 1 | 0 | 1.245416  | 0.318081  | 0.313630 |

-----

**B3LYP/6-31G\***

Energy = -3548.55770299 hartrees  
 Number of Imaginary frequencies = none

Zero-point correction= 1.157089 (Hartree/Particle)  
 Thermal correction to Energy= 1.229949  
 Thermal correction to Enthalpy= 1.230893

Thermal correction to Gibbs Free Energy= 1.038082  
 Sum of electronic and zero-point Energies= -3547.400614  
 Sum of electronic and thermal Energies= -3547.327754  
 Sum of electronic and thermal Enthalpies= -3547.326810  
 Sum of electronic and thermal Free Energies= -3547.519621

|       | E (Thermal)<br>KCal/Mol | CV<br>Cal/Mol-Kelvin | S<br>Cal/Mol-Kelvin |
|-------|-------------------------|----------------------|---------------------|
| Total | 771.805                 | 284.757              | 405.806             |

Standard orientation:

| -----  |        |        |                         |           |           |
|--------|--------|--------|-------------------------|-----------|-----------|
| Center | Atomic | Atomic | Coordinates (Angstroms) |           |           |
| No.    | No.    | Type   | X                       | Y         | Z         |
| -----  |        |        |                         |           |           |
| 1      | 8      | 0      | -1.299161               | -0.375441 | 0.322761  |
| 2      | 6      | 0      | -2.583140               | 0.103558  | 0.404865  |
| 3      | 6      | 0      | -2.799481               | 1.399342  | -0.085137 |
| 4      | 6      | 0      | -1.604634               | 2.193214  | -0.511903 |
| 5      | 6      | 0      | -0.799535               | 1.668896  | -1.541545 |
| 6      | 8      | 0      | -1.088854               | 0.422630  | -1.976470 |
| 7      | 5      | 0      | -0.793379               | -0.691850 | -1.053078 |
| 8      | 8      | 0      | 0.686766                | -0.826822 | -0.876784 |
| 9      | 5      | 0      | 1.375413                | -1.825821 | -1.491178 |
| 10     | 8      | 0      | 0.742143                | -2.840153 | -2.158712 |
| 11     | 5      | 0      | -0.654716               | -2.871129 | -2.162499 |
| 12     | 8      | 0      | -1.380393               | -1.888213 | -1.597160 |
| 13     | 8      | 0      | 2.754782                | -1.773126 | -1.369063 |
| 14     | 6      | 0      | 3.689654                | -2.585339 | -1.971646 |
| 15     | 6      | 0      | 3.502757                | -3.168253 | -3.229405 |
| 16     | 1      | 0      | 2.567142                | -3.030250 | -3.756060 |
| 17     | 6      | 0      | 4.526226                | -3.937833 | -3.783671 |

|    |   |   |           |           |           |
|----|---|---|-----------|-----------|-----------|
| 18 | 1 | 0 | 4.374198  | -4.392980 | -4.758908 |
| 19 | 6 | 0 | 5.732268  | -4.126356 | -3.106090 |
| 20 | 1 | 0 | 6.521842  | -4.727285 | -3.548166 |
| 21 | 6 | 0 | 5.913432  | -3.532564 | -1.856133 |
| 22 | 1 | 0 | 6.847742  | -3.665118 | -1.316828 |
| 23 | 6 | 0 | 4.897833  | -2.762955 | -1.288651 |
| 24 | 1 | 0 | 5.029904  | -2.290490 | -0.319648 |
| 25 | 8 | 0 | -1.191711 | -3.967196 | -2.790463 |
| 26 | 6 | 0 | -2.531122 | -4.263620 | -2.910377 |
| 27 | 6 | 0 | -2.954441 | -4.796185 | -4.130858 |
| 28 | 1 | 0 | -2.229103 | -4.912554 | -4.930466 |
| 29 | 6 | 0 | -4.287911 | -5.167471 | -4.299261 |
| 30 | 1 | 0 | -4.612346 | -5.579232 | -5.251650 |
| 31 | 6 | 0 | -5.200419 | -5.012316 | -3.253622 |
| 32 | 1 | 0 | -6.239721 | -5.300458 | -3.386129 |
| 33 | 6 | 0 | -4.765202 | -4.485720 | -2.035935 |
| 34 | 1 | 0 | -5.464177 | -4.360516 | -1.213115 |
| 35 | 6 | 0 | -3.433140 | -4.112541 | -1.853714 |
| 36 | 1 | 0 | -3.097814 | -3.701961 | -0.908908 |
| 37 | 6 | 0 | -3.616613 | -0.673729 | 1.006674  |
| 38 | 6 | 0 | -3.437526 | -1.978782 | 1.649790  |
| 39 | 6 | 0 | -2.185166 | -2.624144 | 1.823459  |
| 40 | 1 | 0 | -1.294047 | -2.140901 | 1.455836  |
| 41 | 6 | 0 | -2.079424 | -3.850729 | 2.460293  |
| 42 | 1 | 0 | -1.100893 | -4.307362 | 2.581162  |
| 43 | 6 | 0 | -3.220296 | -4.505626 | 2.955024  |
| 44 | 1 | 0 | -3.130603 | -5.471256 | 3.445448  |
| 45 | 6 | 0 | -4.454419 | -3.904462 | 2.811079  |
| 46 | 1 | 0 | -5.350789 | -4.387764 | 3.193622  |
| 47 | 6 | 0 | -4.589828 | -2.648265 | 2.177021  |
| 48 | 6 | 0 | -5.885423 | -2.041890 | 2.083059  |

|    |   |   |           |           |           |
|----|---|---|-----------|-----------|-----------|
| 49 | 1 | 0 | -6.738741 | -2.581574 | 2.487212  |
| 50 | 6 | 0 | -6.042608 | -0.817807 | 1.519997  |
| 51 | 1 | 0 | -7.024447 | -0.354565 | 1.461324  |
| 52 | 6 | 0 | -4.924997 | -0.097943 | 0.981242  |
| 53 | 6 | 0 | -5.145068 | 1.164120  | 0.397119  |
| 54 | 1 | 0 | -6.165703 | 1.531879  | 0.336614  |
| 55 | 6 | 0 | -4.118867 | 1.927337  | -0.136036 |
| 56 | 6 | 0 | -4.456891 | 3.220449  | -0.793677 |
| 57 | 6 | 0 | -5.303662 | 4.142933  | -0.157899 |
| 58 | 1 | 0 | -5.646475 | 3.938050  | 0.852422  |
| 59 | 6 | 0 | -5.682671 | 5.324500  | -0.794517 |
| 60 | 1 | 0 | -6.333019 | 6.027956  | -0.280637 |
| 61 | 6 | 0 | -5.223834 | 5.606079  | -2.082377 |
| 62 | 1 | 0 | -5.519435 | 6.525997  | -2.580288 |
| 63 | 6 | 0 | -4.384371 | 4.695389  | -2.727732 |
| 64 | 1 | 0 | -4.029938 | 4.899209  | -3.734886 |
| 65 | 6 | 0 | -4.004697 | 3.514739  | -2.090750 |
| 66 | 1 | 0 | -3.370700 | 2.801663  | -2.608030 |
| 67 | 6 | 0 | -1.246241 | 3.424444  | 0.108256  |
| 68 | 6 | 0 | -1.945234 | 3.995892  | 1.296899  |
| 69 | 6 | 0 | -2.230895 | 5.370854  | 1.346388  |
| 70 | 1 | 0 | -2.019935 | 5.986144  | 0.476718  |
| 71 | 6 | 0 | -2.809434 | 5.945361  | 2.477332  |
| 72 | 1 | 0 | -3.029686 | 7.009696  | 2.486356  |
| 73 | 6 | 0 | -3.114819 | 5.156780  | 3.587673  |
| 74 | 1 | 0 | -3.567626 | 5.602540  | 4.469368  |
| 75 | 6 | 0 | -2.839420 | 3.788463  | 3.553435  |
| 76 | 1 | 0 | -3.074468 | 3.162936  | 4.410761  |
| 77 | 6 | 0 | -2.262065 | 3.214852  | 2.421172  |
| 78 | 1 | 0 | -2.061319 | 2.148065  | 2.409440  |
| 79 | 6 | 0 | -0.129680 | 4.101216  | -0.372582 |

|     |   |   |           |           |           |
|-----|---|---|-----------|-----------|-----------|
| 80  | 1 | 0 | 0.183990  | 5.020447  | 0.114823  |
| 81  | 6 | 0 | 0.623129  | 3.638515  | -1.472082 |
| 82  | 6 | 0 | 1.758307  | 4.396578  | -1.916748 |
| 83  | 1 | 0 | 1.987147  | 5.326363  | -1.401523 |
| 84  | 6 | 0 | 2.527504  | 3.966831  | -2.949150 |
| 85  | 1 | 0 | 3.386517  | 4.546840  | -3.279113 |
| 86  | 6 | 0 | 2.214085  | 2.756110  | -3.651168 |
| 87  | 6 | 0 | 3.007994  | 2.358958  | -4.751295 |
| 88  | 1 | 0 | 3.860961  | 2.976856  | -5.023510 |
| 89  | 6 | 0 | 2.706377  | 1.224954  | -5.478525 |
| 90  | 1 | 0 | 3.324352  | 0.931442  | -6.322750 |
| 91  | 6 | 0 | 1.580082  | 0.463684  | -5.122478 |
| 92  | 1 | 0 | 1.316108  | -0.416619 | -5.702741 |
| 93  | 6 | 0 | 0.790613  | 0.822985  | -4.042663 |
| 94  | 1 | 0 | -0.080836 | 0.234711  | -3.798219 |
| 95  | 6 | 0 | 1.086787  | 1.966666  | -3.256702 |
| 96  | 6 | 0 | 0.293168  | 2.400929  | -2.105644 |
| 97  | 6 | 0 | 1.943912  | 0.859495  | 2.293184  |
| 98  | 1 | 0 | 1.526625  | 1.560664  | 3.022259  |
| 99  | 7 | 0 | 1.036897  | 0.977930  | 1.086935  |
| 100 | 1 | 0 | 0.064879  | 0.662901  | 1.267243  |
| 101 | 6 | 0 | 3.347584  | 1.321451  | 1.937575  |
| 102 | 6 | 0 | 4.089669  | 1.993451  | 2.915787  |
| 103 | 1 | 0 | 3.648064  | 2.176214  | 3.893527  |
| 104 | 6 | 0 | 5.391389  | 2.431958  | 2.671672  |
| 105 | 6 | 0 | 6.198753  | 3.132530  | 3.737107  |
| 106 | 1 | 0 | 5.660600  | 3.144416  | 4.689639  |
| 107 | 1 | 0 | 6.419107  | 4.171908  | 3.464817  |
| 108 | 1 | 0 | 7.163095  | 2.636463  | 3.888884  |
| 109 | 6 | 0 | 5.944224  | 2.195861  | 1.400335  |
| 110 | 8 | 0 | 7.247713  | 2.599797  | 1.173390  |

|     |   |   |           |           |           |
|-----|---|---|-----------|-----------|-----------|
| 111 | 6 | 0 | 7.382310  | 3.847341  | 0.492569  |
| 112 | 1 | 0 | 8.454359  | 4.044973  | 0.421555  |
| 113 | 1 | 0 | 6.898916  | 4.660991  | 1.049178  |
| 114 | 1 | 0 | 6.954773  | 3.805572  | -0.516889 |
| 115 | 6 | 0 | 5.235249  | 1.510710  | 0.402036  |
| 116 | 6 | 0 | 5.851109  | 1.231290  | -0.947827 |
| 117 | 1 | 0 | 5.480335  | 0.287449  | -1.358911 |
| 118 | 1 | 0 | 6.940615  | 1.177993  | -0.876516 |
| 119 | 1 | 0 | 5.599389  | 2.016829  | -1.672589 |
| 120 | 6 | 0 | 3.933728  | 1.078675  | 0.691977  |
| 121 | 1 | 0 | 3.401850  | 0.534549  | -0.084914 |
| 122 | 6 | 0 | 1.814110  | -0.544123 | 2.866166  |
| 123 | 6 | 0 | 2.454880  | -1.639870 | 2.281509  |
| 124 | 1 | 0 | 3.093981  | -1.497403 | 1.415347  |
| 125 | 6 | 0 | 2.271710  | -2.935672 | 2.774476  |
| 126 | 6 | 0 | 2.940804  | -4.116317 | 2.112522  |
| 127 | 1 | 0 | 2.295869  | -4.999113 | 2.143424  |
| 128 | 1 | 0 | 3.881758  | -4.381627 | 2.612838  |
| 129 | 1 | 0 | 3.180611  | -3.894899 | 1.068617  |
| 130 | 6 | 0 | 1.426858  | -3.108475 | 3.884658  |
| 131 | 8 | 0 | 1.160388  | -4.382284 | 4.353846  |
| 132 | 6 | 0 | 2.121543  | -4.910029 | 5.268197  |
| 133 | 1 | 0 | 1.752890  | -5.893705 | 5.567452  |
| 134 | 1 | 0 | 2.218874  | -4.272379 | 6.156561  |
| 135 | 1 | 0 | 3.107867  | -5.020820 | 4.801137  |
| 136 | 6 | 0 | 0.761441  | -2.029750 | 4.489402  |
| 137 | 6 | 0 | -0.193040 | -2.261863 | 5.634425  |
| 138 | 1 | 0 | -0.590766 | -1.313236 | 6.007518  |
| 139 | 1 | 0 | 0.286341  | -2.780845 | 6.471889  |
| 140 | 1 | 0 | -1.036124 | -2.882960 | 5.311888  |
| 141 | 6 | 0 | 0.974745  | -0.752280 | 3.965390  |



|     |   |   |          |          |          |
|-----|---|---|----------|----------|----------|
| 142 | 1 | 0 | 0.460763 | 0.092930 | 4.420150 |
| 143 | 1 | 0 | 0.998836 | 1.938312 | 0.721936 |
| 144 | 1 | 0 | 1.282024 | 0.332998 | 0.297092 |

---

**BHandHLYP/6-31G\***

Energy = -3546.50524236 hartrees  
 Number of Imaginary frequencies = none

|                                              |                             |
|----------------------------------------------|-----------------------------|
| Zero-point correction=                       | 1.201484 (Hartree/Particle) |
| Thermal correction to Energy=                | 1.271915                    |
| Thermal correction to Enthalpy=              | 1.272859                    |
| Thermal correction to Gibbs Free Energy=     | 1.085723                    |
| Sum of electronic and zero-point Energies=   | -3545.303758                |
| Sum of electronic and thermal Energies=      | -3545.233327                |
| Sum of electronic and thermal Enthalpies=    | -3545.232383                |
| Sum of electronic and thermal Free Energies= | -3545.419519                |

|       | E (Thermal) | CV             | S              |
|-------|-------------|----------------|----------------|
|       | KCal/Mol    | Cal/Mol-Kelvin | Cal/Mol-Kelvin |
| Total | 798.139     | 273.863        | 393.861        |

Standard orientation:

---

| Center No. | Atomic No. | Atomic Type | Coordinates (Angstroms) |           |           |
|------------|------------|-------------|-------------------------|-----------|-----------|
|            |            |             | X                       | Y         | Z         |
| 1          | 8          | 0           | -1.312046               | -0.357533 | 0.320089  |
| 2          | 6          | 0           | -2.588411               | 0.103865  | 0.355173  |
| 3          | 6          | 0           | -2.799521               | 1.387441  | -0.132138 |
| 4          | 6          | 0           | -1.601125               | 2.181685  | -0.524377 |
| 5          | 6          | 0           | -0.768361               | 1.651930  | -1.509730 |
| 6          | 8          | 0           | -1.047239               | 0.418036  | -1.947022 |
| 7          | 5          | 0           | -0.764539               | -0.679992 | -1.019290 |

|    |   |   |           |           |           |
|----|---|---|-----------|-----------|-----------|
| 8  | 8 | 0 | 0.697647  | -0.792277 | -0.806044 |
| 9  | 5 | 0 | 1.416367  | -1.755001 | -1.418608 |
| 10 | 8 | 0 | 0.819712  | -2.767311 | -2.099805 |
| 11 | 5 | 0 | -0.563061 | -2.838914 | -2.117691 |
| 12 | 8 | 0 | -1.310898 | -1.881169 | -1.565580 |
| 13 | 8 | 0 | 2.780376  | -1.674395 | -1.282534 |
| 14 | 6 | 0 | 3.731017  | -2.457864 | -1.868211 |
| 15 | 6 | 0 | 3.578917  | -3.021249 | -3.127505 |
| 16 | 1 | 0 | 2.660401  | -2.887193 | -3.667873 |
| 17 | 6 | 0 | 4.614707  | -3.767419 | -3.665484 |
| 18 | 1 | 0 | 4.490008  | -4.208216 | -4.641490 |
| 19 | 6 | 0 | 5.799136  | -3.950816 | -2.969319 |
| 20 | 1 | 0 | 6.598050  | -4.533007 | -3.398279 |
| 21 | 6 | 0 | 5.945509  | -3.375414 | -1.717579 |
| 22 | 1 | 0 | 6.862148  | -3.503635 | -1.164596 |
| 23 | 6 | 0 | 4.916523  | -2.629774 | -1.166822 |
| 24 | 1 | 0 | 5.021331  | -2.170305 | -0.197639 |
| 25 | 8 | 0 | -1.066652 | -3.940864 | -2.737077 |
| 26 | 6 | 0 | -2.387346 | -4.257481 | -2.865593 |
| 27 | 6 | 0 | -2.801139 | -4.762827 | -4.088346 |
| 28 | 1 | 0 | -2.081331 | -4.846973 | -4.885402 |
| 29 | 6 | 0 | -4.119114 | -5.149579 | -4.262783 |
| 30 | 1 | 0 | -4.436065 | -5.540240 | -5.216663 |
| 31 | 6 | 0 | -5.025547 | -5.036030 | -3.220207 |
| 32 | 1 | 0 | -6.051989 | -5.335418 | -3.357032 |
| 33 | 6 | 0 | -4.599616 | -4.535377 | -1.999808 |
| 34 | 1 | 0 | -5.293078 | -4.441223 | -1.179640 |
| 35 | 6 | 0 | -3.282940 | -4.147967 | -1.812568 |
| 36 | 1 | 0 | -2.955797 | -3.756951 | -0.866030 |
| 37 | 6 | 0 | -3.629428 | -0.683700 | 0.903979  |
| 38 | 6 | 0 | -3.458141 | -1.988660 | 1.535610  |

|    |   |   |           |           |           |
|----|---|---|-----------|-----------|-----------|
| 39 | 6 | 0 | -2.211712 | -2.611794 | 1.756699  |
| 40 | 1 | 0 | -1.318234 | -2.116472 | 1.439955  |
| 41 | 6 | 0 | -2.116940 | -3.836839 | 2.373728  |
| 42 | 1 | 0 | -1.145869 | -4.277282 | 2.532615  |
| 43 | 6 | 0 | -3.262239 | -4.512529 | 2.801251  |
| 44 | 1 | 0 | -3.180505 | -5.476881 | 3.276052  |
| 45 | 6 | 0 | -4.487388 | -3.931381 | 2.611955  |
| 46 | 1 | 0 | -5.385536 | -4.429476 | 2.943037  |
| 47 | 6 | 0 | -4.609850 | -2.675130 | 1.995872  |
| 48 | 6 | 0 | -5.905331 | -2.087947 | 1.856064  |
| 49 | 1 | 0 | -6.759441 | -2.642302 | 2.212354  |
| 50 | 6 | 0 | -6.055181 | -0.869603 | 1.311297  |
| 51 | 1 | 0 | -7.031966 | -0.422269 | 1.217671  |
| 52 | 6 | 0 | -4.929012 | -0.130711 | 0.831731  |
| 53 | 6 | 0 | -5.141053 | 1.127876  | 0.258787  |
| 54 | 1 | 0 | -6.154211 | 1.484368  | 0.167796  |
| 55 | 6 | 0 | -4.111462 | 1.899483  | -0.222761 |
| 56 | 6 | 0 | -4.434640 | 3.196085  | -0.866652 |
| 57 | 6 | 0 | -5.292430 | 4.098212  | -0.241409 |
| 58 | 1 | 0 | -5.660335 | 3.875664  | 0.746942  |
| 59 | 6 | 0 | -5.650160 | 5.284292  | -0.860245 |
| 60 | 1 | 0 | -6.309818 | 5.972286  | -0.355834 |
| 61 | 6 | 0 | -5.156716 | 5.589126  | -2.118654 |
| 62 | 1 | 0 | -5.434936 | 6.511734  | -2.602503 |
| 63 | 6 | 0 | -4.305115 | 4.697593  | -2.753040 |
| 64 | 1 | 0 | -3.923976 | 4.920184  | -3.736805 |
| 65 | 6 | 0 | -3.947828 | 3.512110  | -2.133598 |
| 66 | 1 | 0 | -3.301675 | 2.815802  | -2.640995 |
| 67 | 6 | 0 | -1.265550 | 3.408281  | 0.092571  |
| 68 | 6 | 0 | -2.016739 | 3.997123  | 1.231745  |
| 69 | 6 | 0 | -2.307510 | 5.360202  | 1.237553  |

|     |   |   |           |           |           |
|-----|---|---|-----------|-----------|-----------|
| 70  | 1 | 0 | -2.058840 | 5.954007  | 0.373558  |
| 71  | 6 | 0 | -2.941395 | 5.949631  | 2.317933  |
| 72  | 1 | 0 | -3.165319 | 7.004022  | 2.294725  |
| 73  | 6 | 0 | -3.297130 | 5.186536  | 3.418304  |
| 74  | 1 | 0 | -3.792634 | 5.643212  | 4.259861  |
| 75  | 6 | 0 | -3.016639 | 3.829106  | 3.425612  |
| 76  | 1 | 0 | -3.291141 | 3.224280  | 4.274972  |
| 77  | 6 | 0 | -2.383860 | 3.240959  | 2.343572  |
| 78  | 1 | 0 | -2.182823 | 2.182985  | 2.361635  |
| 79  | 6 | 0 | -0.133611 | 4.068787  | -0.338764 |
| 80  | 1 | 0 | 0.158850  | 4.986186  | 0.146110  |
| 81  | 6 | 0 | 0.661777  | 3.588597  | -1.387872 |
| 82  | 6 | 0 | 1.824233  | 4.325951  | -1.779036 |
| 83  | 1 | 0 | 2.035053  | 5.251839  | -1.267657 |
| 84  | 6 | 0 | 2.633944  | 3.875981  | -2.752482 |
| 85  | 1 | 0 | 3.510285  | 4.435133  | -3.041578 |
| 86  | 6 | 0 | 2.343488  | 2.663046  | -3.451730 |
| 87  | 6 | 0 | 3.189062  | 2.243980  | -4.491981 |
| 88  | 1 | 0 | 4.058854  | 2.840621  | -4.719885 |
| 89  | 6 | 0 | 2.915050  | 1.114114  | -5.215326 |
| 90  | 1 | 0 | 3.570785  | 0.801885  | -6.011716 |
| 91  | 6 | 0 | 1.764414  | 0.380165  | -4.918544 |
| 92  | 1 | 0 | 1.521495  | -0.495307 | -5.499072 |
| 93  | 6 | 0 | 0.926386  | 0.762739  | -3.899315 |
| 94  | 1 | 0 | 0.038578  | 0.196991  | -3.703823 |
| 95  | 6 | 0 | 1.196254  | 1.903822  | -3.115560 |
| 96  | 6 | 0 | 0.351834  | 2.361749  | -2.018236 |
| 97  | 6 | 0 | 1.880569  | 0.868069  | 2.342180  |
| 98  | 1 | 0 | 1.484097  | 1.550487  | 3.087141  |
| 99  | 7 | 0 | 0.974046  | 1.012501  | 1.160678  |
| 100 | 1 | 0 | 0.016067  | 0.703134  | 1.347838  |

|     |   |   |          |           |           |
|-----|---|---|----------|-----------|-----------|
| 101 | 6 | 0 | 3.275818 | 1.320511  | 1.979508  |
| 102 | 6 | 0 | 4.040940 | 1.942720  | 2.958375  |
| 103 | 1 | 0 | 3.626634 | 2.091916  | 3.944125  |
| 104 | 6 | 0 | 5.331476 | 2.372779  | 2.701311  |
| 105 | 6 | 0 | 6.168680 | 3.021958  | 3.764826  |
| 106 | 1 | 0 | 5.655025 | 3.010231  | 4.721204  |
| 107 | 1 | 0 | 6.396493 | 4.057765  | 3.522084  |
| 108 | 1 | 0 | 7.119329 | 2.508381  | 3.877203  |
| 109 | 6 | 0 | 5.849058 | 2.179703  | 1.420138  |
| 110 | 8 | 0 | 7.134137 | 2.584609  | 1.176607  |
| 111 | 6 | 0 | 7.256267 | 3.845223  | 0.554252  |
| 112 | 1 | 0 | 8.317300 | 4.044282  | 0.460782  |
| 113 | 1 | 0 | 6.794644 | 4.627942  | 1.153855  |
| 114 | 1 | 0 | 6.802774 | 3.846260  | -0.434511 |
| 115 | 6 | 0 | 5.116585 | 1.545455  | 0.422549  |
| 116 | 6 | 0 | 5.693129 | 1.313404  | -0.944644 |
| 117 | 1 | 0 | 5.320115 | 0.385874  | -1.367885 |
| 118 | 1 | 0 | 6.775969 | 1.266553  | -0.906024 |
| 119 | 1 | 0 | 5.413488 | 2.112420  | -1.630045 |
| 120 | 6 | 0 | 3.826019 | 1.119489  | 0.722566  |
| 121 | 1 | 0 | 3.277177 | 0.613486  | -0.056417 |
| 122 | 6 | 0 | 1.743232 | -0.540793 | 2.875855  |
| 123 | 6 | 0 | 2.373134 | -1.613920 | 2.263538  |
| 124 | 1 | 0 | 3.016927 | -1.449330 | 1.415628  |
| 125 | 6 | 0 | 2.169303 | -2.914018 | 2.705252  |
| 126 | 6 | 0 | 2.828478 | -4.073537 | 2.014571  |
| 127 | 1 | 0 | 2.175528 | -4.940162 | 2.003227  |
| 128 | 1 | 0 | 3.750430 | -4.365566 | 2.515904  |
| 129 | 1 | 0 | 3.084559 | -3.819006 | 0.991131  |
| 130 | 6 | 0 | 1.316989 | -3.114220 | 3.789912  |
| 131 | 8 | 0 | 1.041543 | -4.388018 | 4.209577  |

|     |   |   |           |           |          |
|-----|---|---|-----------|-----------|----------|
| 132 | 6 | 0 | 1.968881  | -4.942176 | 5.118178 |
| 133 | 1 | 0 | 1.596361  | -5.925128 | 5.380542 |
| 134 | 1 | 0 | 2.049061  | -4.335258 | 6.018182 |
| 135 | 1 | 0 | 2.955265  | -5.040722 | 4.670803 |
| 136 | 6 | 0 | 0.664565  | -2.058453 | 4.421627 |
| 137 | 6 | 0 | -0.298009 | -2.321029 | 5.542527 |
| 138 | 1 | 0 | -0.699125 | -1.390010 | 5.931254 |
| 139 | 1 | 0 | 0.171507  | -2.853865 | 6.365605 |
| 140 | 1 | 0 | -1.128029 | -2.930944 | 5.195568 |
| 141 | 6 | 0 | 0.896116  | -0.774712 | 3.950060 |
| 142 | 1 | 0 | 0.390773  | 0.053142  | 4.425304 |
| 143 | 1 | 0 | 0.937910  | 1.968328  | 0.810969 |
| 144 | 1 | 0 | 1.214804  | 0.384189  | 0.373231 |

---

## H. References:

- (1) Bao, J. M.; Wulff, W. D.; Dominy, J. B.; Fumo, M. J.; Grant, E. B.; Rob, A. C.; Whitcomb, M. C.; Yeung, S. M.; Ostrander, R. L.; Rheingold, A. L. *J. Am. Chem. Soc.* **1996**, *118*, 3392.
- (2) Mukherjee, M.; Gupta, A. K.; Lu, Z.; Zhang, Y.; Wulff, W. D. *J. Org. Chem.* **2010**, *75*, 5643.
- (3) Lu, Z.; Zhang, Y.; Wulff, W. D. *J. Am. Chem. Soc.* **2007**, *129*, 7185.
- (4) Zhang, Y.; Desai, A.; Lu, A.; Hu, G.; Ding, Z.; Wulff, W. D. *Chem. –Eur. J.* **2008**, *14*, 3785.
- (5) Deng, L.; Jacobsen, E. N. *J. Org. Chem.* **1992**, *57*, 4320.
- (6) Yao, W.; Wang, J. *Org. Lett.* **2003**, *5*, 1527.
- (7) Mahmood, S. J.; Hossain, M. M. *J. Org. Chem.* **1998**, *63*, 3333.
- (8) Bolvig, S.; Hansen, P. E. *Magn. Reson. Chem.* **1996**, *34*, 467.
- (9) Gaussian 03, Revision D.01; M. J. Frisch, G. W. T., H. B. Schlegel, G. E. Scuseria, M. A. Robb, J. R. C., J. A. Montgomery, Jr., T. Vreven, K. N. Kudin, J. C. B., J. M. Millam, S. S. Iyengar, J. Tomasi, V. Barone, B. M., M. Cossi, G. Scalmani, N. Rega, G. A. Petersson, H. N., M. Hada, M. Ehara, K. Toyota, R. Fukuda, J. H., M. Ishida, T. Nakajima, Y. Honda, O. Kitao, H. Nakai, M. K., X. Li, J. E. Knox, H. P. Hratchian, J. B. Cross, V. Bakken, C. A., J. Jaramillo, R. Gomperts, R. E. Stratmann, O. Yazyev, A. J. A., R. Cammi, C. Pomelli, J. W. Ochterski, P. Y. Ayala, K. M., G. A. Voth, P. Salvador, J. J. Dannenberg, ; V. G. Zakrzewski, S. D., A. D. Daniels, M. C. Strain, O. Farkas, D. K. M., A. D. Rabuck, K. Raghavachari, J. B. Foresman, J. V. O., Q. Cui, A. G. Baboul, S. Clifford, J. Cioslowski, B. B. S., G. Liu, A. Liashenko, P. Piskorz, I. Komaromi, R. L. M., D. J. Fox, T. Keith, M. A. Al-Laham, C. Y. Peng, A. N., M. Challacombe, P. M. W. Gill, ; B. Johnson, W. C., M. W. Wong, C. Gonzalez, and J. A. Pople, Gaussian, Inc., Wallingford CT, 2004.

- (10) Becke, A. D. *Phys. Rev. A* **1988**, 38, 3098.
- (11) Lee, C. Y., W.; Parr, R. G. *Phys. Rev. B* **1988**, 37, 785.
- (12) Becke, A. D. *J. Chem. Phys.* **1993**, 98, 1372.
- (13) Zhao, Y.; Truhlar, D. G. *J. Chem. Theory Comput.* **2005**, 1, 415.
- (14) Yu, W.; Liang, L.; Lin, Z.; Ling, S.; Haranczyk, M.; Gutowski, M. *J. Comput. Chem.* **2009**, 30, 589.

I.  $^1\text{H}$  and  $^{13}\text{C}$  NMR of **1a**, **1a'**, **5a**, **5a'**, **6** and **12**:

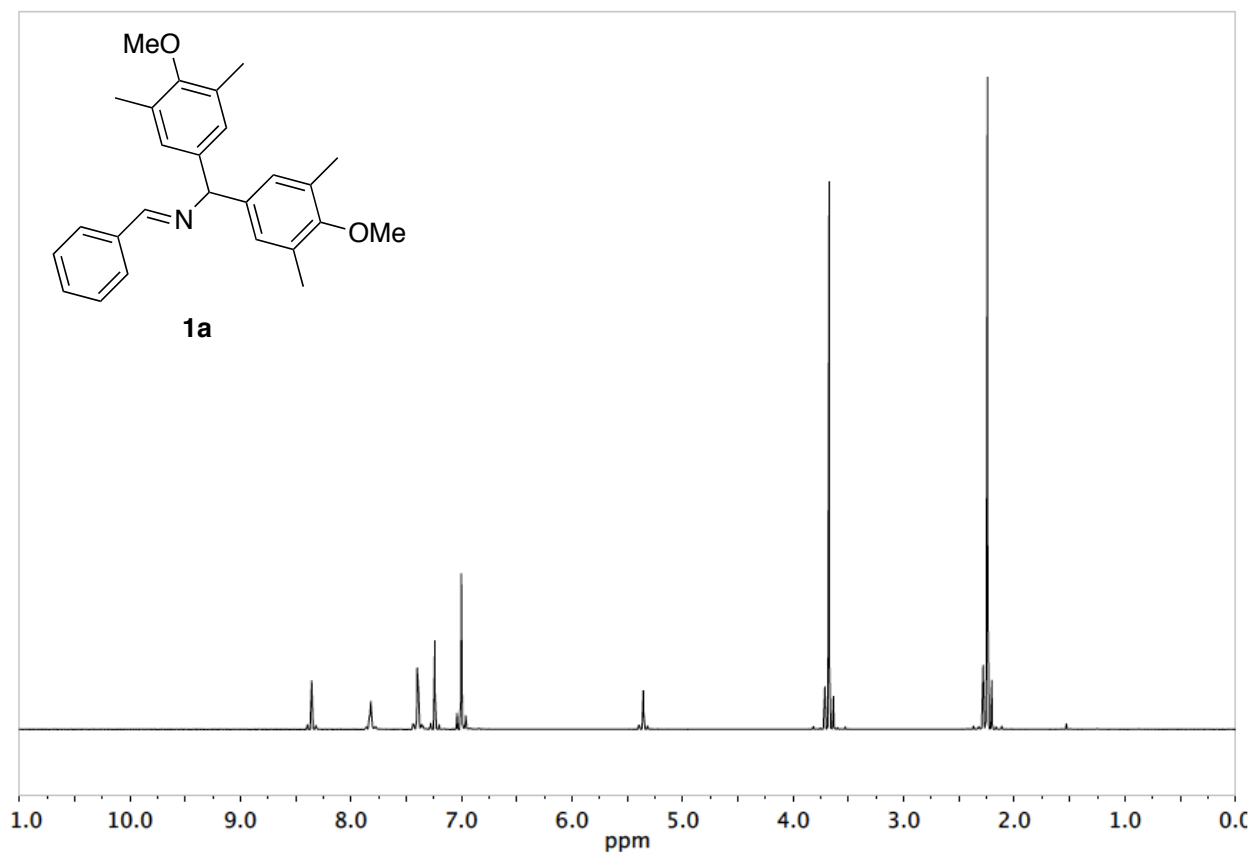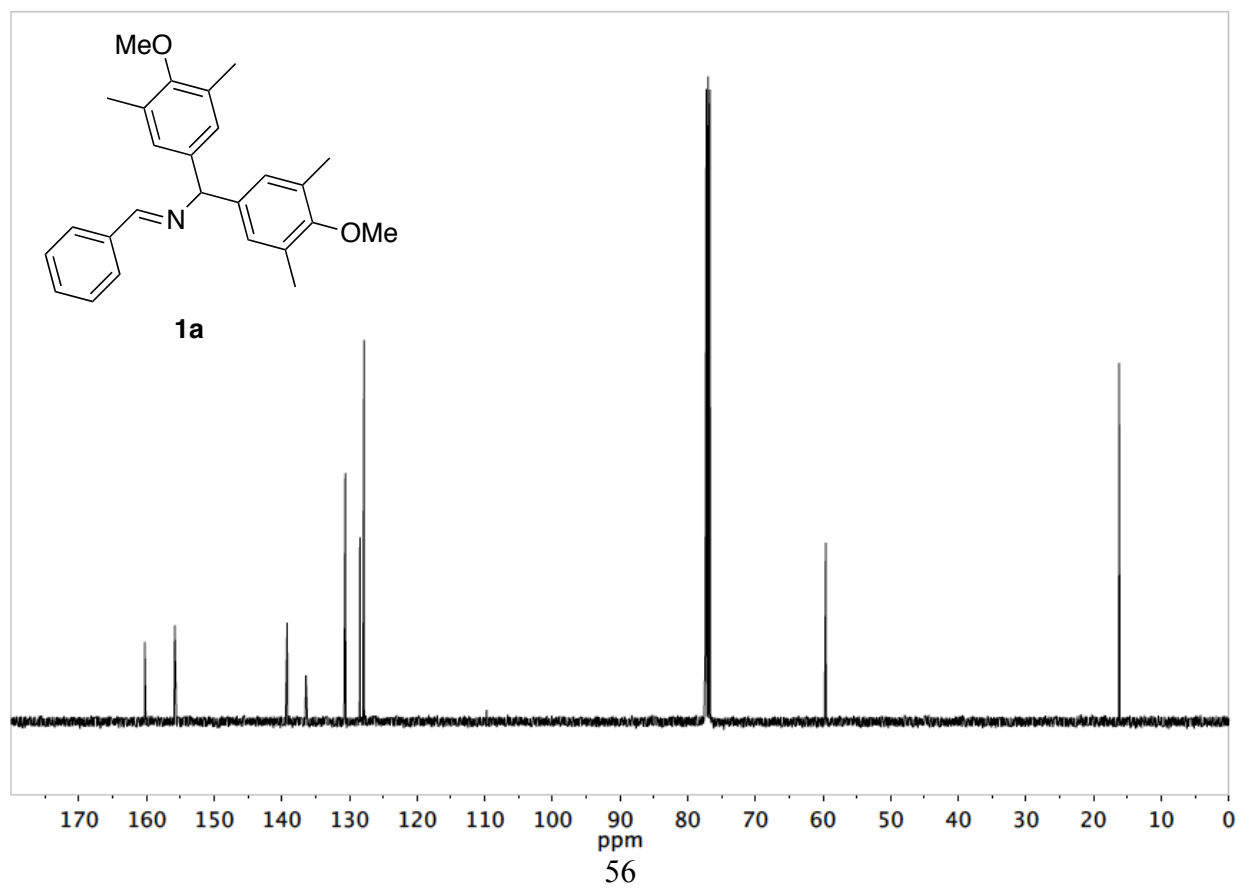



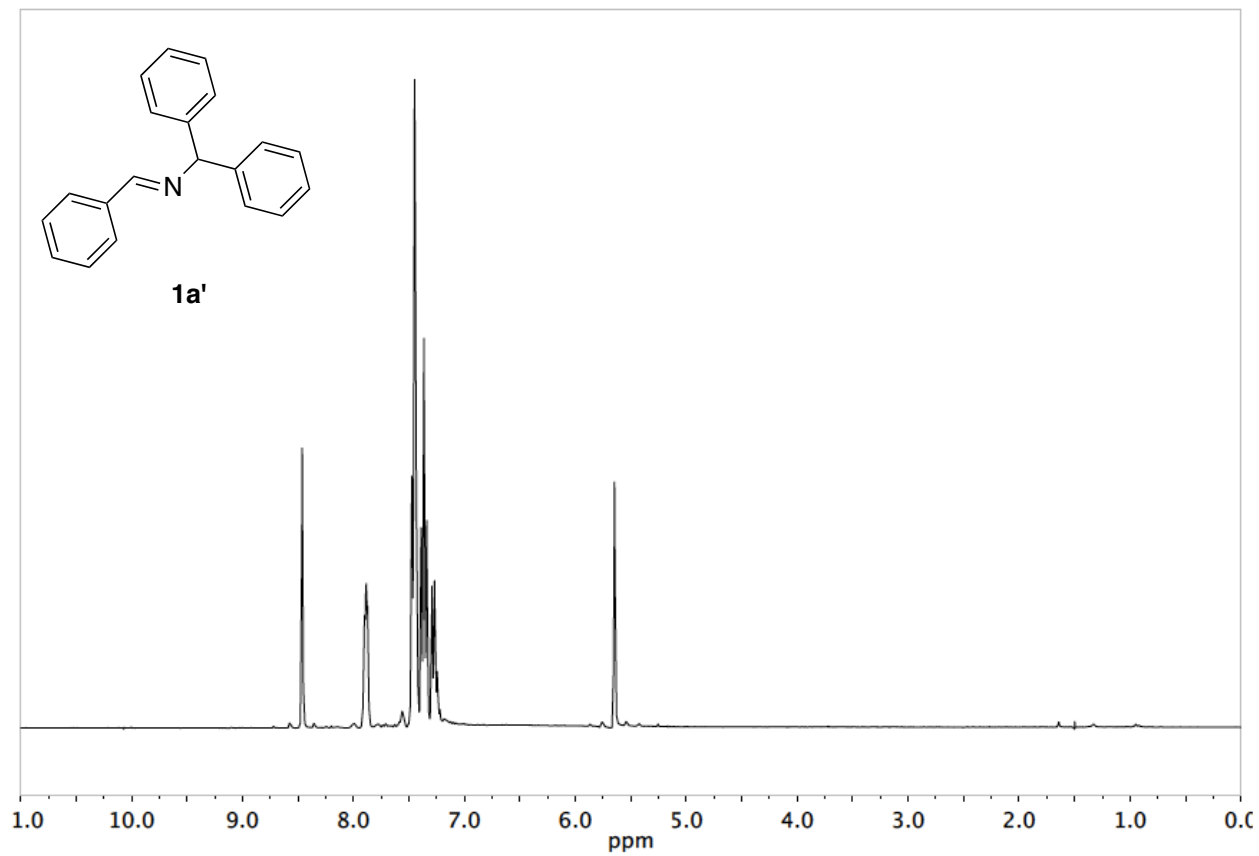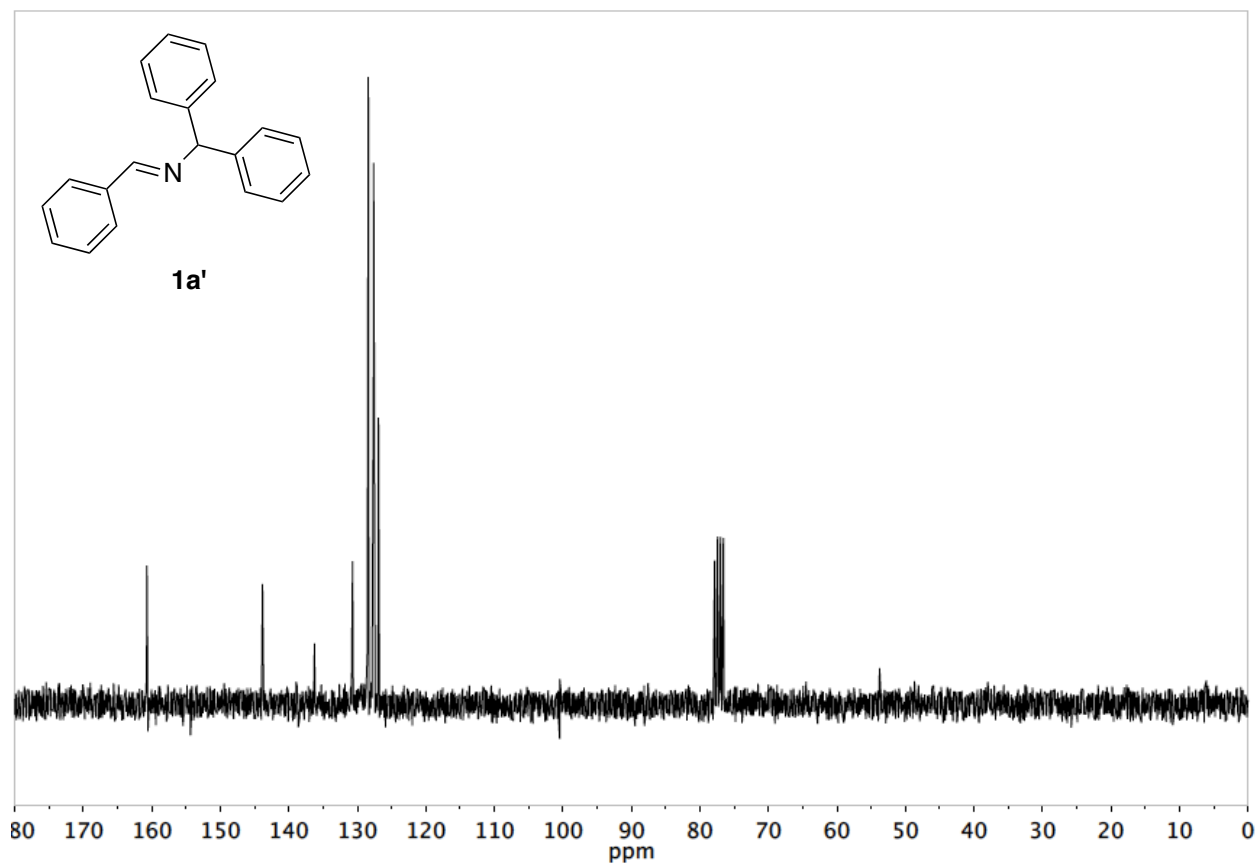

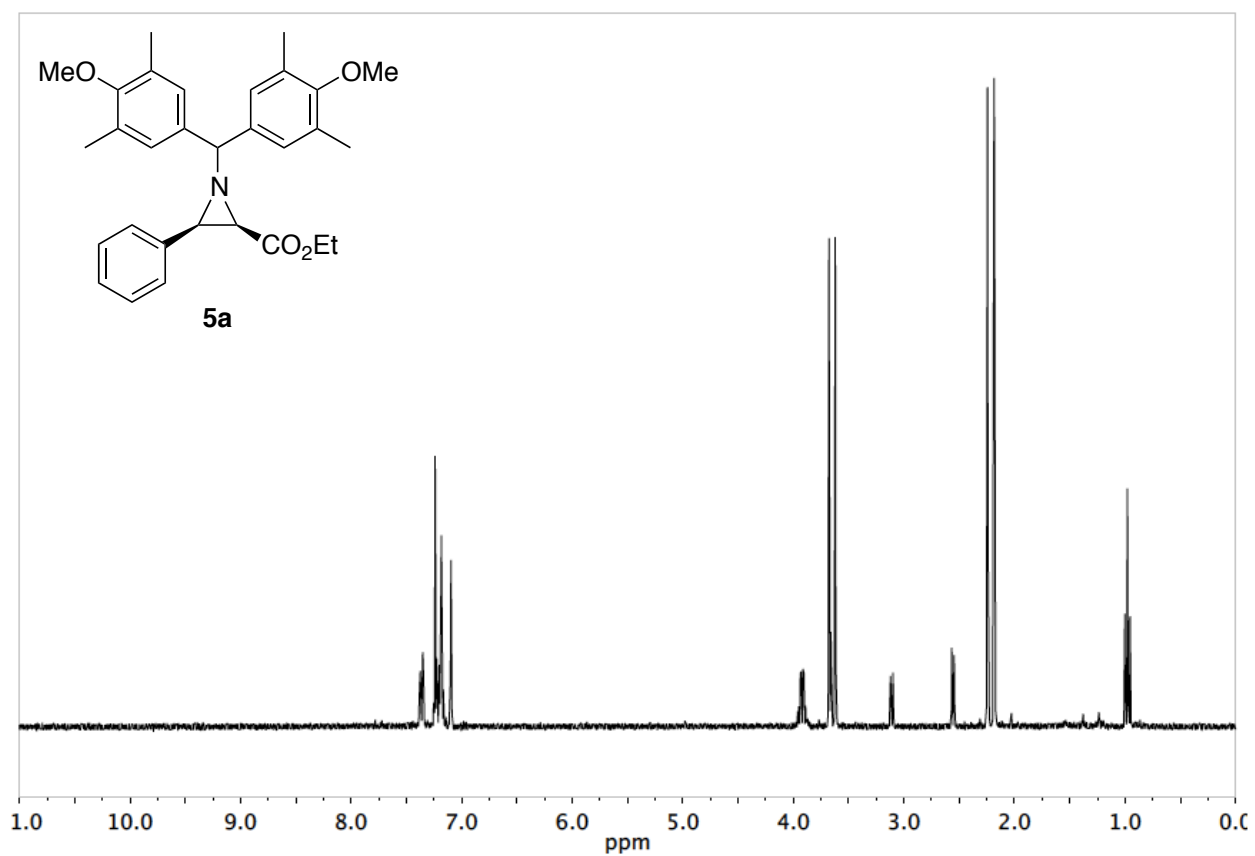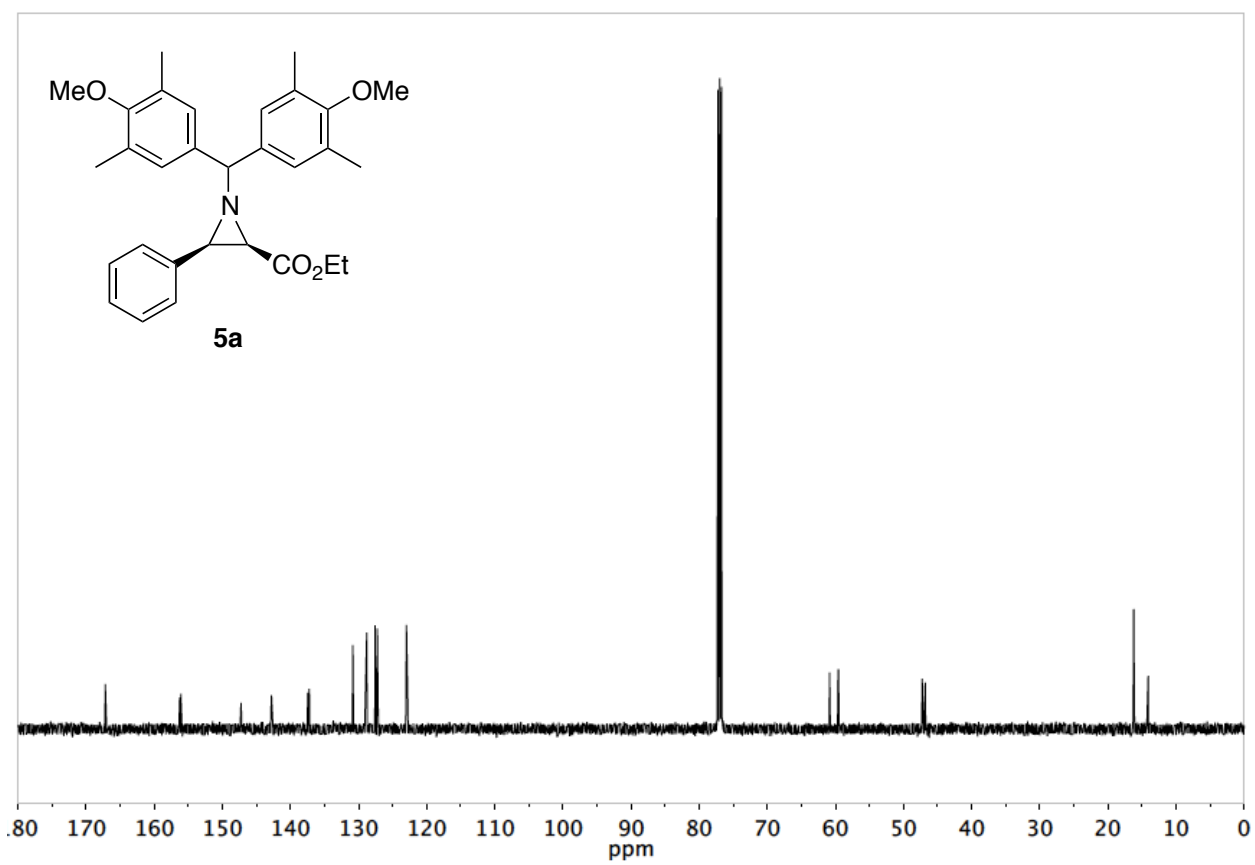

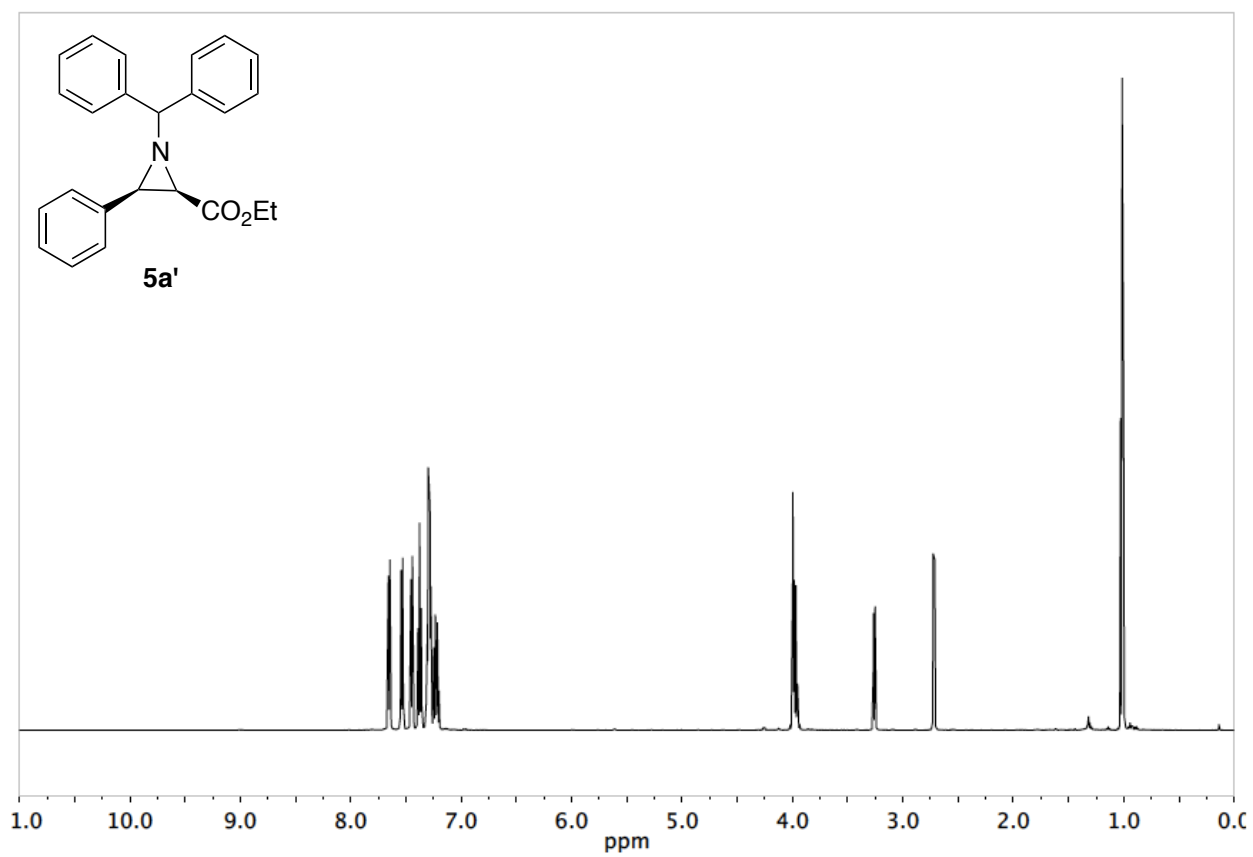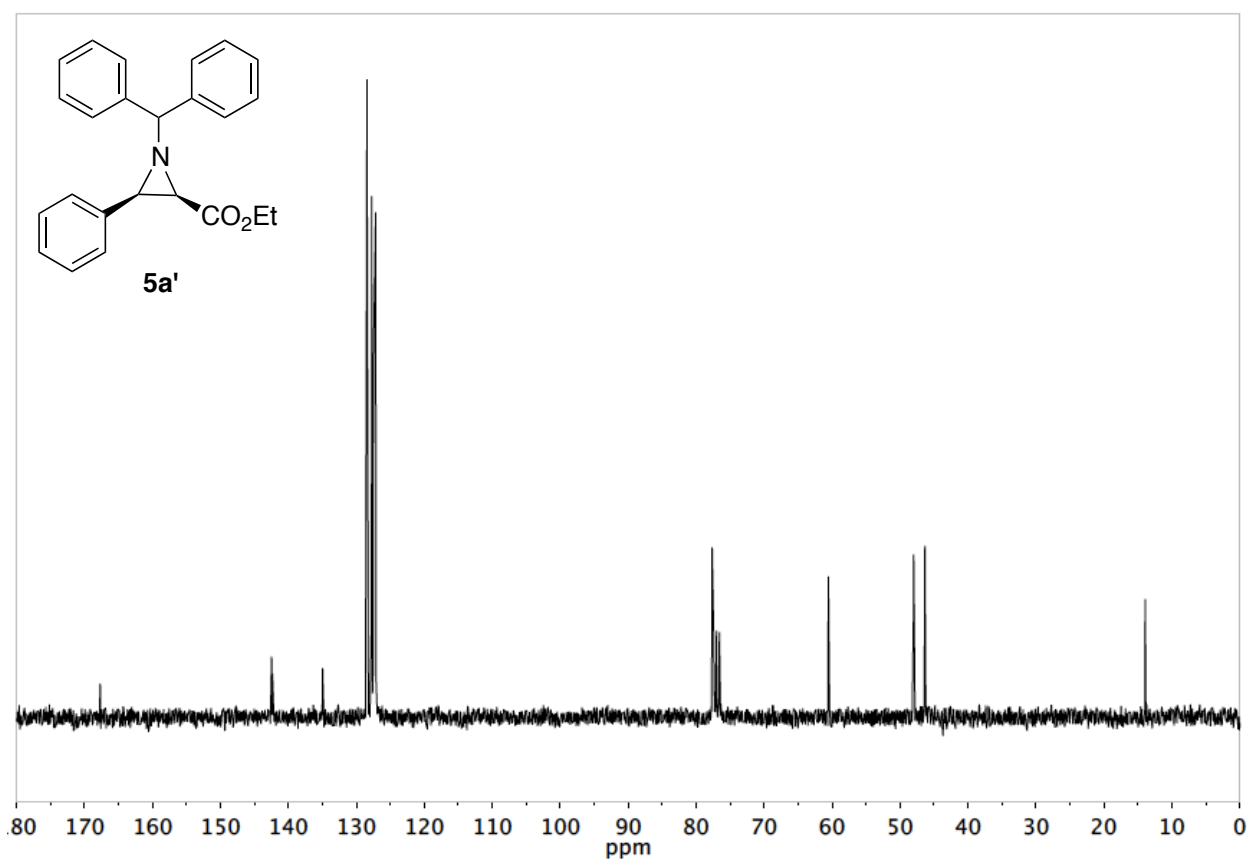

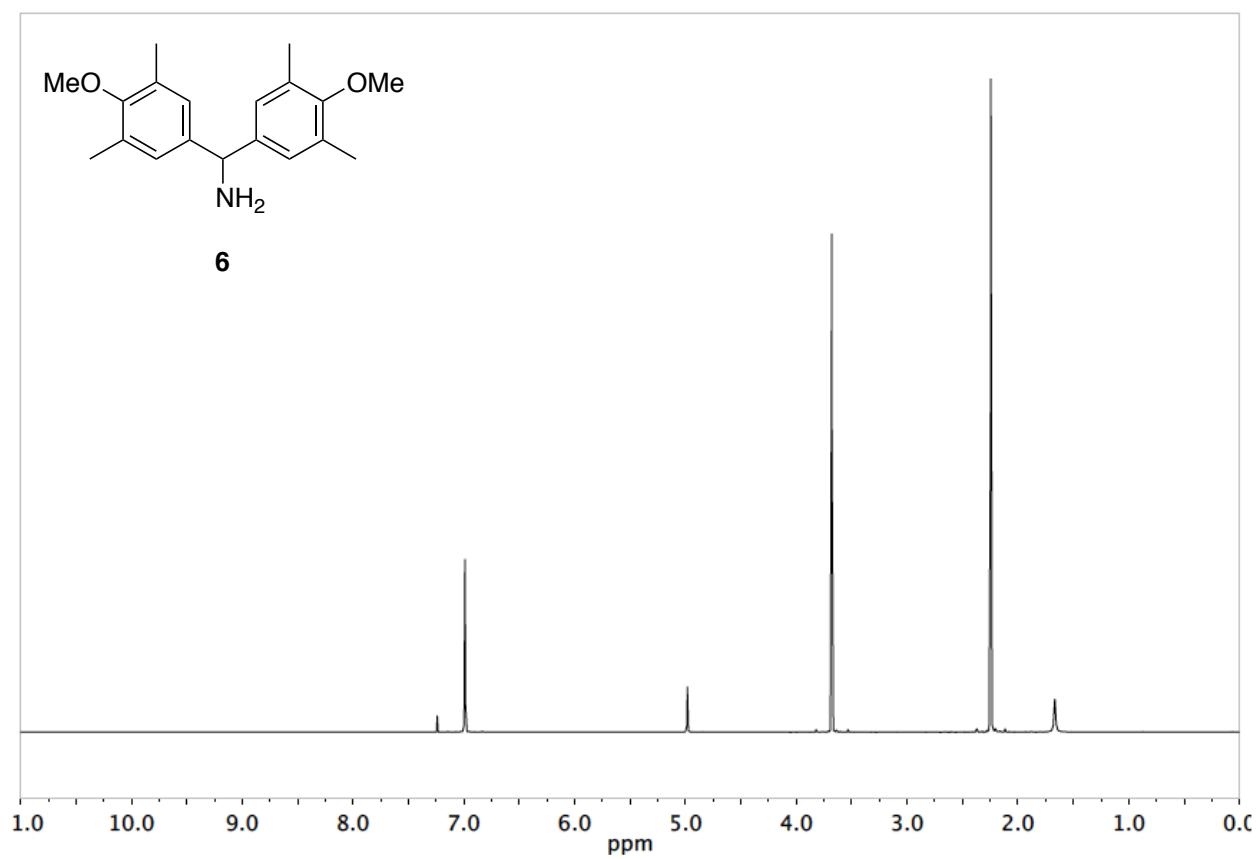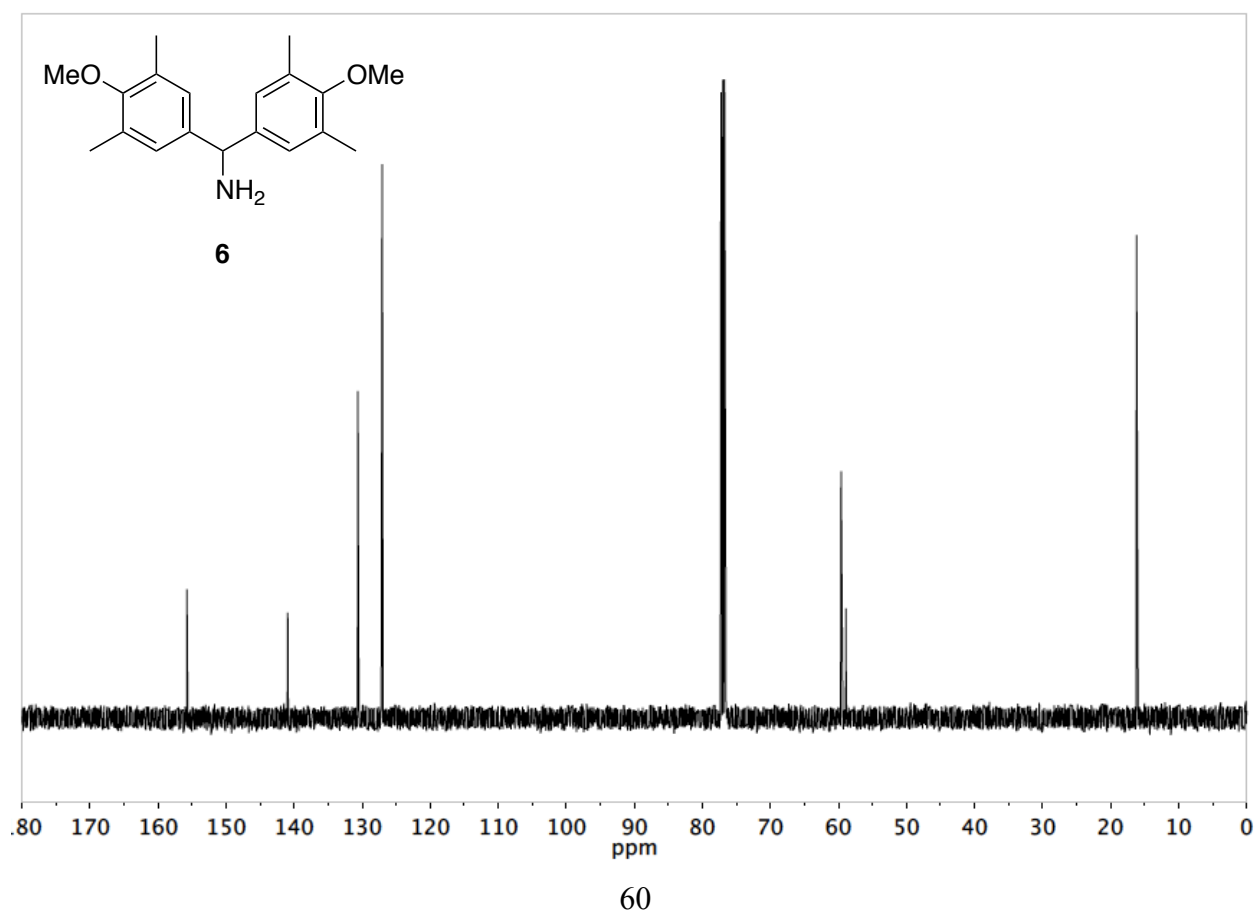

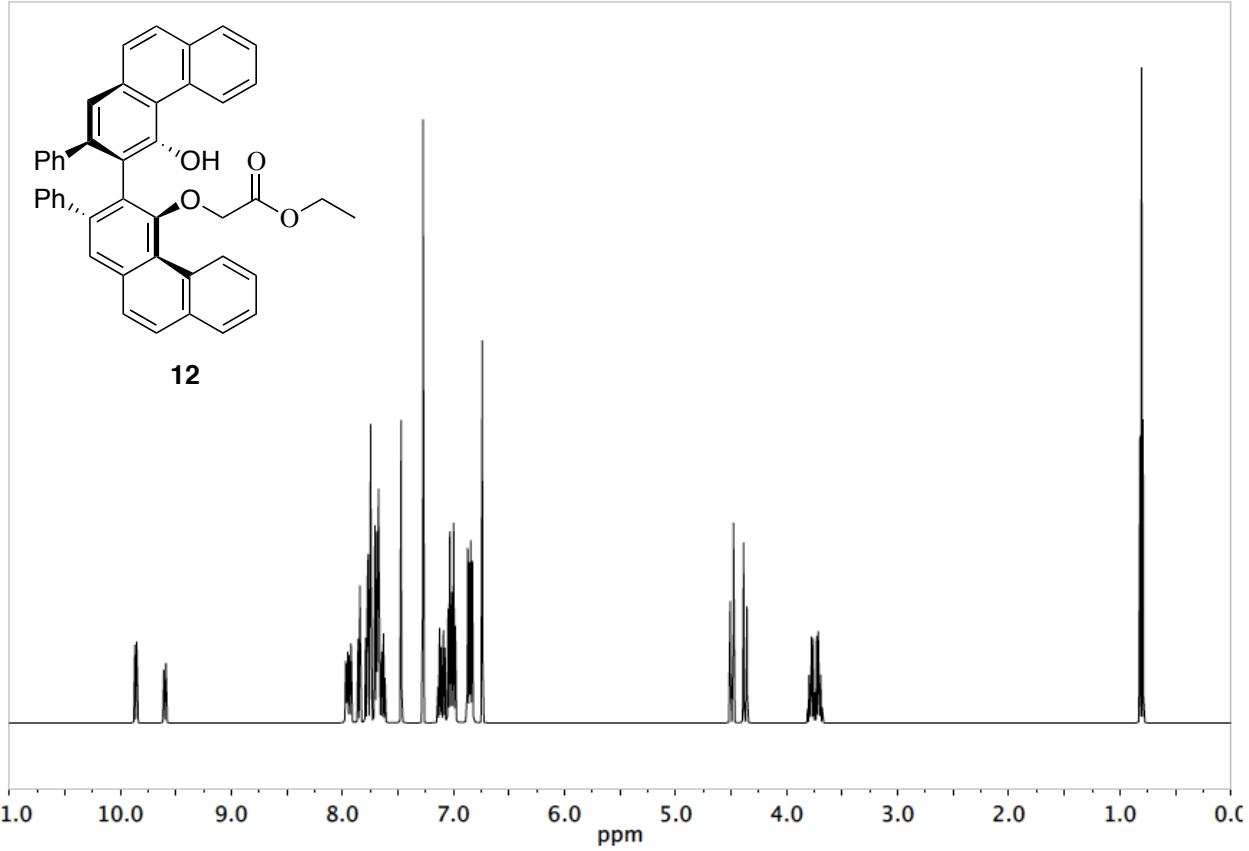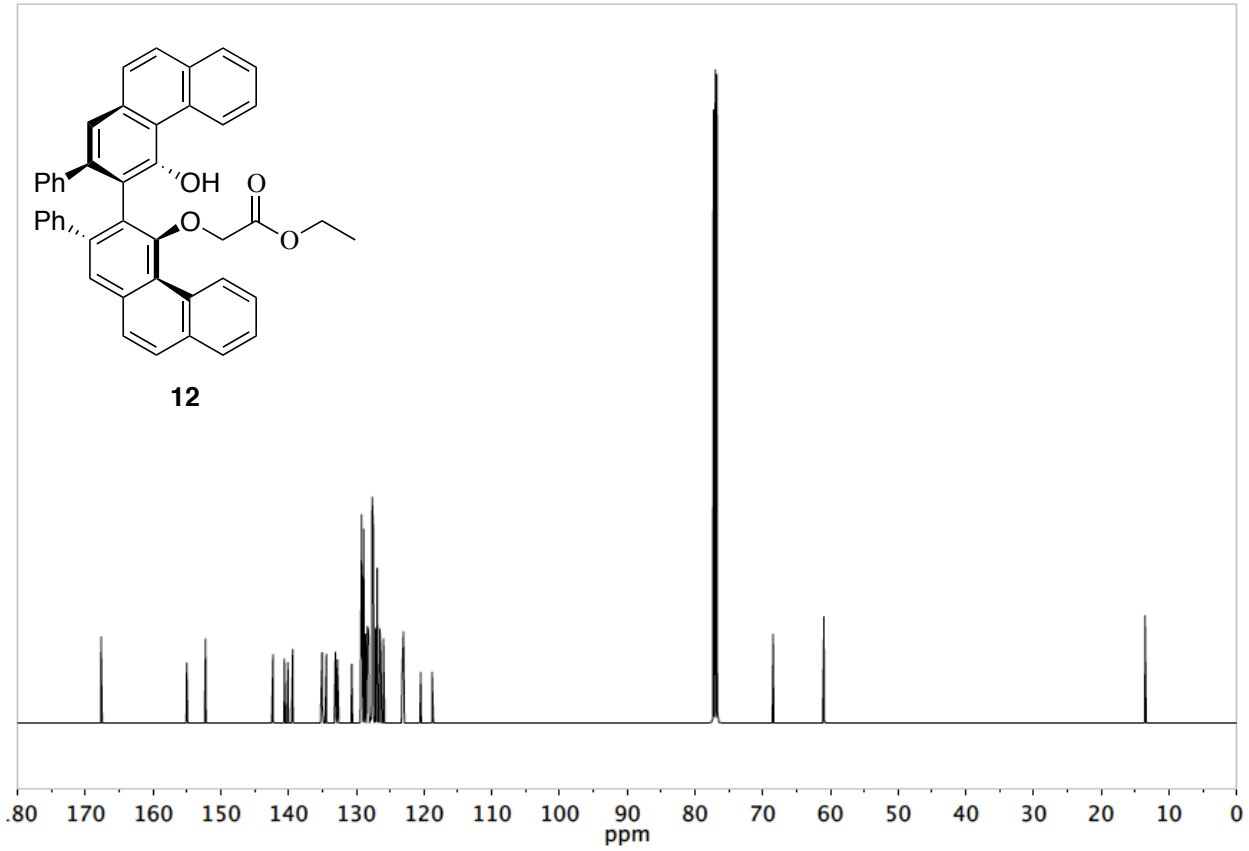

Supplement: NIHMS405462-supplement-3_si_003.pdf [file NIHMS405462-supplement-3_si_003.pdf]
